# Supplementary material for: Diverse patterns of antibody variable gene repertoire disruption in patients with amyloid light chain (AL) amyloidosis
Source: PubMed Central journal article supplement (PMC7340310; doi:10.1371/journal.pone.0235713), 2020-07-07
Supplement: pone.0235713.s001.pdf [file pone.0235713.s001.pdf]

Table S1. Detailed results of antibody gene repertoire sequence analysis experiments for bone marrow aspirate specimens from seven patients with AL amyloidosis

| Patient                    | Light chain                                         |                                                        |                                           |                           |                                       | Heavy chain                                       |                                                      |                                           |                        |                                        |                         |
|----------------------------|-----------------------------------------------------|--------------------------------------------------------|-------------------------------------------|---------------------------|---------------------------------------|---------------------------------------------------|------------------------------------------------------|-------------------------------------------|------------------------|----------------------------------------|-------------------------|
|                            | Sequences obtained                                  |                                                        | Genetic features of the dominant sequence |                           |                                       | Sequences obtained                                |                                                      | Genetic features of the dominant sequence |                        |                                        |                         |
|                            | Sequence reads for each of 1-3 technical replicates | Unique clonotypes for each of 1-3 technical replicates | V <sub>K</sub> or L gene*                 | J <sub>K</sub> or L gene* | LCDR3 (amino acids)*                  | Sequence reads for each of 3 technical replicates | Unique clonotypes for each of 3 technical replicates | V <sub>H</sub> gene*                      | J <sub>H</sub> gene*   | HCDR3 (amino acids)*                   |                         |
| AM1                        | 1,963<br>2,296<br>1,953                             | 1,006<br>1,139<br>1,029                                | <i>IGLV3-21</i><br>-<br>-                 | <i>IGLJ3</i><br>-<br>-    | QVWDRSSDRPV<br>-----<br>-----         | 351<br>391<br>357                                 | 340<br>366<br>334                                    | <i>IGHV4-39</i><br>-<br>-                 | <i>IGHJ6</i><br>-<br>- | VRHGVPSAPYYYYMDI<br>-----<br>-----     |                         |
| AM2<br><i>Time-point 1</i> | 5,754<br>4,755                                      | 3,575<br>2,946                                         | <i>IGLV3-25</i><br>-                      | <i>IGLJ2</i><br>-         | <b>QSADSSGTYEVI</b><br>-----<br>----- | 1,225<br>1,372<br>1,260                           | 1,071<br>1,185<br>1,082                              | <i>IGHV5-51</i><br>-<br>-                 | <i>IGHJ4</i><br>-<br>- | <b>ARRRDGYNFDY</b><br>-----<br>-----   |                         |
|                            | Time-point 2                                        | 1,590<br>843<br>1,018                                  | 857<br>476<br>591                         | -<br>-<br>-               | -<br>-<br>-                           | -----<br>-----<br>-----                           | 470<br>601<br>640                                    | 288<br>322<br>344                         | -<br>-<br>-            | -<br>-<br>-                            | -----<br>-----<br>----- |
|                            |                                                     | Time-point 3                                           | 82<br>958<br>977                          | 176<br>309<br>299         | -<br>-<br>-                           | -<br>-<br>-                                       | -----<br>-----<br>-----                              | 353<br>456<br>497                         | 185<br>241<br>240      | -<br>-<br>-                            | -<br>-<br>-             |
| AM3                        | 2,020<br>2,457<br>2,250                             | 1,489<br>1,727<br>1,647                                | <i>IGLV1-47</i><br>-<br>-                 | <i>IGLJ1</i><br>-<br>-    | AAWDGSLSGYV<br>-----<br>-----         | 288<br>1,060<br>1,069                             | 226<br>931<br>979                                    | <i>IGHV3-23</i><br>-<br>-                 | <i>IGHJ3</i><br>-<br>- | AKDISYDDILPGYPADAFDI<br>-----<br>----- |                         |
| AM4                        | 994<br>788<br>989                                   | 817<br>659<br>807                                      | <i>IGLV2-14</i><br>-<br>-                 | <i>IGLJ1</i><br>-<br>-    | SSFTSSSSYV<br>-----<br>-----          | 614<br>837<br>819                                 | 269<br>300<br>291                                    | <i>IGHV3-23</i><br>-<br>-                 | <i>IGHJ6</i><br>-<br>- | AKRPPYSIYGMDV<br>-----<br>-----        |                         |
| AM5                        | 577                                                 | 266                                                    | <i>IGLV2-14</i>                           | <i>IGLJ1</i>              | SSYTIINTLV                            | 154<br>191<br>113                                 | 151<br>187<br>110                                    | <i>IGHV6-1</i><br>-<br>-                  | <i>IGHJ3</i><br>-<br>- | ARTHDDFWSGAFDI<br>-----<br>-----       |                         |
| AM6                        | 1,316                                               | 919                                                    | <i>IGKV3-20</i>                           | <i>IGKJ4</i>              | QQYGTSPILT                            | 2,491<br>2,609<br>2,770                           | 1,960<br>2,072<br>2,199                              | <i>IGHV3-23</i><br>-<br>-                 | <i>IGHJ4</i><br>-<br>- | TRKGGYFDF<br>-----<br>-----            |                         |
| AM7                        | 475                                                 | 223                                                    | <i>IGLV6-57</i>                           | <i>IGLJ3</i>              | QSYQGSSGV                             | 828<br>791<br>843                                 | 735<br>702<br>755                                    | <i>IGHV4-59</i><br>-<br>-                 | <i>IGHJ4</i><br>-<br>- | ARDKYSRGGEYVN<br>-----<br>-----        |                         |

\* The – symbol indicates the genetic feature is identical to that of the sequence above.

**Bolded features** show consistency of the dominant clone within one individual over a time of 3 years.
