# Supplementary material for: Diverse patterns of antibody variable gene repertoire disruption in patients with amyloid light chain (AL) amyloidosis
Source: PubMed Central journal article supplement (PMC7340310; doi:10.1371/journal.pone.0235713), 2020-07-07
Supplement: pone.0235713.s002.pdf [file pone.0235713.s002.pdf]

| <b>Table S2. Primers used for next generation sequencing</b> |                                                                                  |                                                        |
|--------------------------------------------------------------|----------------------------------------------------------------------------------|--------------------------------------------------------|
| <b>Primer</b>                                                | <b>Application</b>                                                               | <b>Sequence</b>                                        |
| <i>First-strand cDNA synthesis</i>                           |                                                                                  |                                                        |
| SmartNNNext                                                  | 5' – template-switch oligo with sequencing illumina adaptor.<br>U = dU, rG-riboG | AGATGUGTAUAAGAGACAGNNNNUNNNNUNNNNUCTT(rG) <sub>4</sub> |
| <i>Human IGH cDNA synthesis primer mix</i>                   |                                                                                  |                                                        |
| hIGG_r1                                                      | Primer for cDNA synthesis, human IgG heavy-chain mRNA                            | GAAGTAGTCCTTGACCAGGCA                                  |
| hIGM_r1                                                      | Primer for cDNA synthesis, human IgM heavy-chain mRNA                            | GTGATGGAGTCGGGAAGGAAG                                  |
| hIGA_r1                                                      | Primer for cDNA synthesis, human IgA heavy-chain mRNA                            | GCGACGACCACGTTCCCATCT                                  |
| hIGD_r1                                                      | Primer for cDNA synthesis, human IgD heavy-chain mRNA                            | GGACCACAGGGCTGTTATC                                    |
| hIGE_r1                                                      | Primer for cDNA synthesis, human IgE heavy-chain mRNA                            | AGTCACGGAGGTGGCATTG                                    |
| <i>Human IGL cDNA synthesis primer mix</i>                   |                                                                                  |                                                        |
| hIGLC_r1                                                     | Primer for cDNA synthesis, human IgL light-chain mRNA                            | GCTCCCGGTTAGAAGT                                       |
| hIGKC_r1                                                     | Primer for cDNA synthesis, human IgK light-chain mRNA                            | GCGTTATCCACCTTCC                                       |
| <i>First PCR amplification</i>                               |                                                                                  |                                                        |
| Common primer                                                | Step-out primer, anneals on the switch adaptor                                   | AGATGTGTATAAGAGACAG                                    |
| <i>Human IGH reverse primer mix</i>                          |                                                                                  |                                                        |
| Common-hIGGE_r2                                              | Nested primer with sequencing illumina adaptor, human IgG/IgE heavy-chain cDNA   | AGATGTGTATAAGAGACAGARGGGGAAGACSGATG                    |
| Common-hIGA_r2                                               | Nested primer with sequencing illumina adaptor, human IgA heavy-chain cDNA       | AGATGTGTATAAGAGACAGCAGCGGGAAGACCTTG                    |
| Common-hIGM_r2                                               | Nested primer with sequencing illumina adaptor, human IgM heavy-chain cDNA       | AGATGTGTATAAGAGACAGAGGGGGAAAAGGGTTG                    |
| Common-hIGD_r2                                               | Nested primer with sequencing illumina adaptor, human IgD heavy-chain cDNA       | AGATGTGTATAAGAGACAGATATGATGGGGAACAC                    |
| <i>Human IGL reverse primer mix</i>                          |                                                                                  |                                                        |
| Common-hIGL_r2                                               | Nested primer with sequencing illumina adaptor, human IgL heavy-chain cDNA       | AGATGTGTATAAGAGACAGGYGGGAACAGAGTGAC                    |
| Common-hIGK_r2                                               | Nested primer with sequencing illumina adaptor, human IgK heavy-chain cDNA       | AGATGTGTATAAGAGACAGGATGGTGCAGCCACAG                    |
| <i>Second PCR amplification</i>                              |                                                                                  |                                                        |
| F-common                                                     | Step-out primer with sequencing and P7 illumina adapters                         | TCGTCGGCAGCGTCAGATGTGTATAAGAGACAG                      |
| R- common                                                    | Step-out primer with sequencing and P5 illumina adapters                         | GTCTCGTGGGCTCGGAGATGTGTATAAGAGACAG                     |
| <i>Third PCR amplification</i>                               |                                                                                  |                                                        |
| Fc_i7                                                        | Step-out primer with index 1 illumina adapter                                    | CAAGCAGAAGACGGCATAACGAGAT[i7]GTCTCGTGGGCTCGG           |
| Fc_i5                                                        | Step-out primer with index 2 illumina adapter                                    | AATGATACGGCGACCACCGAGATCTACAC[i5]TCGTCGGCAGCGTC        |
