# Supplementary material for: Diverse patterns of antibody variable gene repertoire disruption in patients with amyloid light chain (AL) amyloidosis
Source: PubMed Central journal article supplement (PMC7340310; doi:10.1371/journal.pone.0235713), 2020-07-07
Supplement: pone.0235713.s003.pdf [file pone.0235713.s003.pdf]

|                           |    |     |    |    |    |    |    |    |     |   |   |   |
|---------------------------|----|-----|----|----|----|----|----|----|-----|---|---|---|
| 5b42930250f5f91012e71b12  | S  | T   | A  | T  | T  | L  | L  | R  | L   | R | R |   |
| 5b42930250f5f91012e71e14  | S  | S   | T  | A  | T  | T  | L  | L  | L   | R | R |   |
| 5b42930250f5f91012e72040  | S  | T   | A  | T  | T  | L  | L  | W  | R   | R | R |   |
| 5b4292ee50f5f91012e70035  | S  | T   | A  | T  | T  | L  | L  | LA | W   | R | R |   |
| 5b42930250f5f91012e71ef6  | S  | T   | A  | T  | T  | L  | L  | A  | L   | R | R |   |
| 5b42930250f5f91012e71e7f  | S  | T   | A  | T  | T  | L  | L  | L  | L   | R | R |   |
| 5b42930250f5f91012e7212e  | S  | T   | A  | T  | T  | L  | L  | L  | G   | R | R |   |
| 5b4292ee50f5f91012e6ffeef | S  | T   | A  | T  | T  | L  | L  | L  | L   | R | R |   |
| 5b42931550f5f91012e74c2b  | S  | T   | A  | T  | T  | L  | L  | L  | Y   | R | R |   |
| 5b42930250f5f91012e720b7  | S  | T   | A  | T  | T  | L  | L  | L  | L   | R | R |   |
| 5b42930250f5f91012e71c1c  | S  | T   | A  | T  | T  | L  | L  | L  | L   | R | R |   |
| 5b4292ee50f5f91012e70289  | S  | T   | A  | T  | T  | L  | L  | L  | L   | R | R |   |
| 5b4292ee50f5f91012e6fc95  | S  | T   | A  | T  | T  | L  | L  | L  | L   | R | R |   |
| 5b42930250f5f91012e71ccc  | S  | T   | A  | T  | T  | L  | L  | L  | D   | R | R |   |
| 5b42930250f5f91012e71e9f  | S  | D   | T  | A  | T  | T  | L  | L  | L   | R | R |   |
| 5b42931550f5f91012e74f6b  | S  | T   | A  | T  | T  | L  | L  | L  | L   | R | R |   |
| 5b4292ee50f5f91012e6fdf1  | S  | T   | A  | T  | T  | L  | L  | L  | L   | R | R |   |
| 5b4292ee50f5f91012e6fcd1  | S  | T   | A  | T  | T  | L  | L  | L  | L   | R | R |   |
| 5b4292ee50f5f91012e70311  | S  | T   | A  | T  | T  | L  | L  | L  | L   | R | R |   |
| 5b4292ee50f5f91012e700df  | S  | T   | A  | T  | T  | L  | L  | L  | L   | R | R |   |
| 5b4292ee50f5f91012e6fd55  | A  | K   | DD | ET | E  | L  | L  | L  | L   | R | R |   |
| 5b42930250f5f91012e71fa4  | S  | T   | A  | T  | T  | L  | L  | V  | L   | R | R |   |
| 5b42931550f5f91012e74dcf  | S  | T   | A  | L  | T  | T  | L  | L  | L   | R | R |   |
| 5b42931550f5f91012e74d68  | S  | P   | T  | A  | T  | T  | L  | L  | N   | L | R | R |
| 5b42930250f5f91012e71b0b  | S  | T   | A  | T  | T  | L  | L  | L  | L   | R | R |   |
| 5b42930250f5f91012e71fd1  | S  | T   | A  | T  | T  | L  | L  | L  | L   | R | R |   |
| 5b42931550f5f91012e74e14  | S  | H   | T  | A  | T  | T  | L  | L  | L   | R | R |   |
| 5b42931550f5f91012e74962  | S  | T   | A  | T  | T  | L  | L  | L  | A   | R | R |   |
| 5b42931550f5f91012e74c30  | E  | S   | T  | A  | T  | T  | L  | L  | L   | R | R |   |
| 5b42931550f5f91012e75098  | S  | T   | A  | T  | T  | L  | L  | L  | T   | R | R |   |
| 5b42930250f5f91012e72026  | S  | G   | T  | A  | T  | T  | L  | L  | L   | R | R |   |
| 5b42930250f5f91012e71eec  | S  | TNA | T  | T  | L  | L  | L  | L  | L   | R | R |   |
| 5b42931550f5f91012e750ac  | S  | T   | A  | T  | T  | L  | L  | L  | L   | R | R |   |
| 5b4292ee50f5f91012e6fbb7  | S  | T   | A  | T  | T  | L  | L  | L  | R   | R | R |   |
| 5b42931550f5f91012e74f31  | S  | T   | A  | T  | T  | L  | L  | L  | RQS | R | R |   |
| 5b4292ee50f5f91012e701b0  | S  | T   | A  | T  | T  | L  | L  | LA | L   | R | R |   |
| 5b4292ee50f5f91012e7030b  | S  | T   | AR | T  | T  | L  | L  | L  | L   | R | R |   |
| 5b42930250f5f91012e71a30  | S  | T   | A  | T  | T  | L  | L  | L  | L   | R | R |   |
| 5b42931550f5f91012e74ea2  | S  | T   | A  | T  | T  | L  | L  | L  | L   | R | R |   |
| 5b4292ee50f5f91012e6fef5  | S  | T   | A  | T  | T  | L  | L  | L  | G   | R | R |   |
| 5b42931550f5f91012e750b7  | S  | T   | A  | T  | T  | L  | L  | L  | R   | R | R |   |
| 5b42930250f5f91012e71ba8  | S  | H   | T  | A  | T  | T  | L  | L  | L   | R | R |   |
| 5b42931550f5f91012e74bf8  | S  | T   | A  | T  | T  | L  | L  | L  | L   | R | R |   |
| 5b4292ee50f5f91012e6fbb8  | T  | A   | T  | T  | L  | L  | L  | L  | L   | R | R |   |
| 5b42930250f5f91012e71a7a  | E  | S   | T  | A  | T  | T  | L  | L  | L   | R | R |   |
| 5b42930250f5f91012e71e26  | S  | T   | A  | T  | T  | L  | L  | L  | L   | R | R |   |
| 5b42931550f5f91012e74b6d  | S  | T   | A  | T  | T  | L  | L  | S  | L   | R | R |   |
| 5b42930250f5f91012e71bf5  | S  | T   | A  | T  | T  | L  | L  | L  | E   | R | R |   |
| 5b42930250f5f91012e71bf9  | S  | T   | A  | T  | T  | L  | L  | I  | L   | R | R |   |
| 5b4292ee50f5f91012e6fdb7  | S  | T   | A  | T  | T  | L  | L  | L  | L   | R | R |   |
| 5b4292ee50f5f91012e6fc77  | S  | T   | A  | T  | T  | L  | L  | G  | L   | R | R |   |
| 5b4292ee50f5f91012e70234  | E  | D   | D  | IN | RA | L  | L  | L  | G   | R | R |   |
| 5b42930250f5f91012e71ff5  | S  | T   | A  | T  | P  | T  | L  | L  | L   | R | R |   |
| 5b42931550f5f91012e74e8b  | S  | T   | A  | T  | T  | L  | L  | L  | L   | R | R |   |
| 5b42931550f5f91012e74af7  | S  | T   | A  | T  | T  | L  | L  | L  | L   | R | R |   |
| 5b42930250f5f91012e71c5f  | S  | T   | A  | T  | P  | T  | L  | L  | L   | R | R |   |
| 5b4292ee50f5f91012e7006a  | T  | A   | T  | T  | L  | L  | L  | L  | L   | R | R |   |
| 5b42930250f5f91012e71db1  | S  | T   | A  | T  | T  | L  | L  | L  | S   | R | R |   |
| 5b42930250f5f91012e72325  | S  | T   | A  | T  | T  | L  | L  | L  | L   | R | R |   |
| 5b42930250f5f91012e71cd6  | S  | T   | A  | T  | T  | L  | L  | L  | L   | R | R |   |
| 5b42930250f5f91012e72120  | S  | T   | A  | V  | T  | T  | L  | L  | L   | R | R |   |
| 5b4292ee50f5f91012e7011d  | S  | T   | A  | T  | T  | L  | L  | L  | L   | R | R |   |
| 5b4292ee50f5f91012e700ae  | S  | D   | T  | A  | T  | K  | L  | L  | L   | R | R |   |
| 5b4292ee50f5f91012e700d4  | S  | T   | A  | T  | T  | L  | L  | L  | L   | R | R |   |
| 5b42931550f5f91012e7494c  | S  | T   | A  | H  | T  | L  | L  | L  | L   | R | R |   |
| 5b42931550f5f91012e74bf2  | S  | T   | A  | T  | T  | L  | L  | L  | L   | R | R |   |
| 5b4292ee50f5f91012e6ffde  | S  | T   | A  | T  | T  | L  | L  | H  | L   | R | R |   |
| 5b42930250f5f91012e71d8c  | S  | T   | A  | T  | T  | L  | L  | L  | L   | R | R |   |
| 5b42930250f5f91012e71d33  | S  | T   | A  | T  | T  | L  | L  | L  | L   | R | R |   |
| 5b42931550f5f91012e749a8  | K  | S   | Q  | L  | L  | L  | L  | L  | L   | R | R |   |
| 5b42930250f5f91012e721c2  | M  | S   | T  | A  | T  | T  | L  | L  | L   | R | R |   |
| 5b42930250f5f91012e71a94  | S  | T   | A  | T  | S  | SL | L  | L  | L   | R | R |   |
| 5b4292ee50f5f91012e6ff15  | T  | T   | A  | T  | T  | L  | L  | L  | L   | R | R |   |
| 5b4292ee50f5f91012e6fbf1  | S  | T   | A  | T  | T  | L  | L  | T  | L   | R | R |   |
| 5b42931550f5f91012e7507e  | S  | T   | A  | T  | T  | L  | L  | L  | L   | R | R |   |
| 5b4292ee50f5f91012e702fc  | S  | T   | A  | T  | T  | L  | L  | L  | L   | R | R |   |
| 5b4292ee50f5f91012e700cb  | S  | T   | AY | T  | R  | T  | L  | L  | A   | R | R |   |
| 5b42930250f5f91012e71c8f  | S  | T   | A  | T  | T  | L  | L  | E  | L   | R | R |   |
| 5b42930250f5f91012e71dfd  | S  | T   | A  | T  | T  | L  | L  | L  | L   | R | R |   |
| 5b42931550f5f91012e74cf4  | S  | T   | A  | T  | T  | L  | L  | L  | L   | R | R |   |
| 5b42930250f5f91012e71a9b  | S  | T   | TA | T  | T  | L  | L  | L  | L   | R | R |   |
| 5b42930250f5f91012e71ad4  | S  | T   | A  | T  | T  | L  | L  | L  | L   | R | R |   |
| 5b4292ee50f5f91012e6fc99  | S  | T   | A  | T  | T  | L  | L  | L  | L   | R | R |   |
| 5b42930250f5f91012e71e0a  | S  | T   | A  | T  | T  | L  | L  | L  | T   | R | R |   |
| 5b4292ee50f5f91012e702d7  | S  | T   | A  | T  | T  | L  | L  | L  | L   | R | R |   |
| 5b4292ee50f5f91012e6fe7e  | S  | T   | A  | T  | TT | L  | L  | L  | L   | R | R |   |
| 5b42931550f5f91012e74f0f  | S  | T   | A  | T  | T  | L  | L  | LA | L   | R | R |   |
| 5b42931550f5f91012e74c9f  | S  | T   | A  | T  | T  | L  | L  | L  | L   | R | R |   |
| 5b4292ee50f5f91012e702fd  | VS | T   | A  | T  | T  | L  | L  | L  | L   | R | R |   |
| 5b4292ee50f5f91012e70251  | S  | T   | A  | T  | T  | L  | L  | L  | E   | R | R |   |
| 5b4292ee50f5f91012e6fdf0  | S  | V   | T  | A  | T  | T  | L  | L  | L   | R | R |   |
| 5b4292ee50f5f91012e701ca  | S  | T   | A  | T  | T  | L  | L  | W  | L   | R | R |   |
| 5b42931550f5f91012e74cac  | S  | T   | A  | T  | T  | L  | L  | L  | L   | R | R |   |
| 5b42930250f5f91012e72172  | S  | T   | A  | T  | T  | L  | L  | L  | L   | R | R |   |
| 5b4292ee50f5f91012e70216  | S  | T   | A  | T  | T  | L  | L  | L  | L   | R | R |   |
| 5b42931550f5f91012e74d54  | S  | T   | A  | T  | T  | L  | L  | L  | L   | R | R |   |
| 5b42930250f5f91012e71c17  | S  | G   | T  | S  | T  | T  | L  | L  | L   | R | R |   |
| 5b4292ee50f5f91012e6fe45  | S  | T   | A  | T  | T  | L  | L  | L  | L   | R | R |   |
| 5b4292ee50f5f91012e6fc1e  | S  | T   | A  | T  | T  | L  | L  | L  | L   | R | R |   |
| 5b42931550f5f91012e7496e  | S  | T   | A  | T  | L  | T  | L  | L  | L   | R | R |   |
| 5b42930250f5f91012e71b46  | S  | T   | A  | T  | T  | L  | L  | L  | L   | R | R |   |
| 5b42931550f5f91012e74fa7  | S  | T   | A  | T  | T  | L  | L  | L  | G   | R | R |   |
| 5b4292ee50f5f91012e6ff6b  | S  | T   | A  | P  | T  | L  | L  | H  | L   | R | R |   |
| 5b4292ee50f5f91012e6fe99  | T  | AD  | GL | H  | A  | F  | NT | E  | K   | R | R |   |
| 5b42930250f5f91012e720cc  | S  | T   | A  | T  | T  | L  | L  | T  | L   | R | R |   |
| 5b4292ee50f5f91012e6fcd0  | S  | T   | A  | T  | T  | L  | L  | L  | L   | R | R |   |

|                           |    |      |     |     |   |     |   |     |    |    |       |      |
|---------------------------|----|------|-----|-----|---|-----|---|-----|----|----|-------|------|
| 5b42931550f5f91012e7497a  | S  | T.A  | T   | T   | L | L   | L | L   | L  | D  | R     | R    |
| 5b4292ee50f5f91012e6fda0  | S  | T.A  | T   | T   | L | L   | L | L   | L  | R  | R     | R    |
| 5b4292ee50f5f91012e70118  | S  | T.A  | T   | T   | L | L   | L | L   | L  | R  | R     | R    |
| 5b42930250f5f91012e71ec3  | S  | K.A  | T   | T   | L | L   | L | L   | L  | R  | R     | R    |
| 5b42931550f5f91012e74a83  | S  | T.A  | T   | T   | L | L   | L | L   | L  | R  | R     | SDRP |
| 5b4292ee50f5f91012e6ff1f  | S  | T.A  | T   | T   | L | L   | L | L   | L  | R  | R     | R    |
| 5b42930250f5f91012e722dd  | S  | T.A  | T   | T   | L | L   | L | L   | L  | R  | R     | R    |
| 5b4292ee50f5f91012e7018f  | S  | T.A  | T   | T   | L | L   | L | L   | L  | R  | R     | R    |
| 5b42930250f5f91012e72016  | S  | T.A  | T   | T   | L | L   | L | L   | L  | S  | R     | R    |
| 5b4292ee50f5f91012e6ff67  | S  | T.A  | T   | T   | K | L   | L | L   | L  | R  | R     | R    |
| 5b42930250f5f91012e71eac  | S  | T.A  | T   | T   | D | L   | L | L   | L  | R  | R     | R    |
| 5b42930250f5f91012e71e81  | S  | T.A  | T   | T   | L | L   | L | L   | L  | R  | R     | R    |
| 5b42930250f5f91012e71cf8  | P  | A    | V   | S   | K | ARD | T | L   | L  | L  | R     | R    |
| 5b42931550f5f91012e750cd  | S  | T.AW | T   | T   | L | L   | L | L   | L  | R  | R     | R    |
| 5b42930250f5f91012e71a25  | S  | T.A  | T   | T   | L | L   | L | L   | L  | ST | R     | R    |
| 5b42930250f5f91012e71b7f  | S  | T.A  | T   | T   | L | L   | L | L   | L  | R  | R     | R    |
| 5b42931550f5f91012e74f2a  | S  | T.A  | H   | T   | T | L   | L | L   | LA | PH | N.A.R | R    |
| 5b42930250f5f91012e71d8d  | S  | S    | T.A | T   | T | L   | L | L   | L  | R  | R     | R    |
| 5b42931550f5f91012e74bc2  | G  | S    | T.A | T   | T | L   | L | L   | L  | R  | R     | R    |
| 5b4292ee50f5f91012e6ffdf  | S  | T.A  | T   | T   | L | L   | L | L   | L  | M  | R     | R    |
| 5b42930250f5f91012e71f09  | AS | T.A  | T   | T   | L | L   | L | L   | L  | R  | R     | R    |
| 5b42930250f5f91012e72186  | S  | T.A  | T   | RT  | L | L   | L | L   | L  | A  | R     | R    |
| 5b42930250f5f91012e71c9c  | S  | T.A  | T   | T   | L | L   | L | L   | L  | R  | R     | R    |
| 5b42930250f5f91012e71ce8  | S  | T.A  | T   | T   | L | L   | L | L   | L  | R  | R     | R    |
| 5b4292ee50f5f91012e6ff69  | S  | T.A  | T   | T   | L | L   | L | L   | L  | C  | R     | R    |
| 5b4292ee50f5f91012e6feb6  | F  | K    | S   | D   | Y | L   | M | F.N | P  | R  | R     | R    |
| 5b4292ee50f5f91012e6fe70  | S  | T.A  | T   | T   | A | L   | L | L   | L  | R  | R     | R    |
| 5b4292ee50f5f91012e6fd3c  | S  | T.A  | T   | T   | L | L   | L | L   | L  | R  | R     | R    |
| 5b4292ee50f5f91012e6fc7e  | S  | M.A  | T   | T   | L | L   | L | L   | L  | R  | R     | R    |
| 5b4292ee50f5f91012e6fec6  | S  | T.A  | T   | T   | L | L   | L | L   | L  | R  | R     | R    |
| 5b42930250f5f91012e722b5  | S  | T.A  | T   | T   | L | L   | L | L   | L  | I  | R     | R    |
| 5b4292ee50f5f91012e700c6  | S  | T.A  | T   | T   | L | L   | L | L   | L  | R  | R     | R    |
| 5b42930250f5f91012e720df  | S  | T.A  | T   | T   | L | L   | L | L   | L  | R  | R     | R    |
| 5b4292ee50f5f91012e701da  | S  | T.A  | T   | P   | T | L   | L | L   | L  | R  | R     | R    |
| 5b42930250f5f91012e7205a  | S  | T.A  | T   | TS  | L | L   | L | L   | L  | R  | R     | R    |
| 5b42931550f5f91012e74f2c  | S  | T.A  | T   | T   | L | L   | L | L   | L  | R  | R     | R    |
| 5b42931550f5f91012e74950  | S  | T.A  | T   | T   | T | L   | L | L   | L  | R  | R     | R    |
| 5b42930250f5f91012e72137  | S  | T.A  | T   | T   | L | L   | L | L   | L  | N  | R     | R    |
| 5b42930250f5f91012e71d5e  | S  | T.A  | T   | T   | L | L   | L | L   | L  | R  | R     | R    |
| 5b42930250f5f91012e71f4b  | S  | T.A  | TR  | T   | L | L   | L | L   | L  | R  | R     | R    |
| 5b42931550f5f91012e74ae6  | S  | T.A  | T   | T   | L | L   | L | L   | L  | R  | R     | R    |
| 5b4292ee50f5f91012e6fe33  | S  | TRA  | T   | T   | L | L   | L | L   | L  | R  | R     | R    |
| 5b42930250f5f91012e71e21  | S  | T.A  | T   | T   | L | L   | L | L   | L  | G  | R     | R    |
| 5b4292ee50f5f91012e6ffb2  | S  | T.A  | T   | T   | L | L   | L | L   | L  | T  | R     | R    |
| 5b42930250f5f91012e71c0e  | S  | T.A  | T   | T   | L | L   | L | L   | L  | R  | R     | R    |
| 5b42931550f5f91012e74e4f  | S  | M.A  | T   | T   | L | L   | L | L   | L  | R  | R     | R    |
| 5b42930250f5f91012e71c21  | S  | T.A  | T   | T   | L | L   | L | L   | L  | G  | R     | R    |
| 5b42930250f5f91012e722fd  | S  | T.A  | T   | T   | L | L   | L | L   | L  | R  | R     | R    |
| 5b4292ee50f5f91012e6fba0  | S  | V    | T.A | T   | T | L   | L | L   | L  | R  | R     | R    |
| 5b42930250f5f91012e72304  | S  | T.A  | T   | T   | L | L   | L | L   | L  | R  | R     | R    |
| 5b42930250f5f91012e71ce5  | S  | T.AY | T   | T   | L | L   | L | L   | L  | R  | R     | R    |
| 5b4292ee50f5f91012e6ffb0  | S  | T    | TG  | LK  | A | M   | T | A   | L  | K  | A     | T    |
| 5b4292ee50f5f91012e70146  | S  | T.A  | T   | T   | I | L   | L | L   | L  | R  | R     | R    |
| 5b42931550f5f91012e74a30  | S  | T.A  | T   | T   | L | L   | L | L   | L  | G  | R     | R    |
| 5b4292ee50f5f91012e6fe63  | S  | L    | D   | VVT | E | I   | L | L   | L  | R  | R     | R    |
| 5b42930250f5f91012e71a70  | S  | T.A  | T   | T   | L | L   | L | L   | L  | R  | R     | R    |
| 5b42930250f5f91012e72087  | S  | DT   | A   | T   | T | L   | L | L   | L  | R  | R     | R    |
| 5b4292ee50f5f91012e6ff4c  | S  | T.A  | T   | T   | L | L   | L | L   | L  | R  | R     | R    |
| 5b4292ee50f5f91012e6fd3f  | E  | R    | T   | T   | L | L   | L | L   | L  | R  | R     | R    |
| 5b4292ee50f5f91012e70208  | S  | T.A  | T   | T   | L | L   | L | L   | L  | S  | R     | R    |
| 5b42930250f5f91012e722a9  | S  | T.A  | T   | T   | P | L   | L | L   | L  | R  | R     | R    |
| 5b4292ee50f5f91012e6fbeb  | S  | T    | TG  | PK  | A | L   | L | L   | L  | R  | R     | R    |
| 5b42931550f5f91012e74ffdf | S  | T.A  | T   | T   | L | L   | L | L   | L  | D  | R     | R    |
| 5b42930250f5f91012e71f32  | S  | A    | T.A | T   | T | L   | L | L   | L  | R  | R     | R    |
| 5b42930250f5f91012e7222a  | S  | T.A  | T   | T   | L | L   | L | L   | L  | I  | R     | R    |
| 5b42930250f5f91012e72108  | S  | T.A  | T   | T   | L | L   | L | L   | L  | R  | R     | R    |
| 5b42930250f5f91012e71d0d  | S  | T.A  | T   | T   | L | L   | L | L   | L  | C  | R     | R    |
| 5b42931550f5f91012e74c74  | S  | T.A  | TT  | T   | L | L   | L | L   | L  | A  | R     | R    |
| 5b42931550f5f91012e749af  | S  | T.A  | T   | T   | L | L   | L | L   | L  | GQ | R     | R    |
| 5b42930250f5f91012e72155  | S  | T.S  | T   | T   | L | L   | L | L   | L  | R  | R     | R    |
| 5b42930250f5f91012e71a71  | S  | T.A  | T   | T   | L | L   | L | L   | L  | R  | R     | R    |
| 5b42930250f5f91012e71a84  | S  | T.A  | T   | T   | L | L   | L | L   | L  | A  | R     | R    |
| 5b42931550f5f91012e7506f  | S  | T.A  | T   | T   | V | L   | L | L   | L  | R  | R     | R    |
| 5b42930250f5f91012e721d9  | S  | T.A  | T   | T   | L | L   | L | L   | L  | R  | R     | R    |
| 5b4292ee50f5f91012e6fd43  | A  | T.A  | DD  | ETE | L | E   | L | L   | L  | R  | R     | R    |
| 5b4292ee50f5f91012e6fedd  | S  | K    | T.A | T   | T | L   | L | L   | L  | R  | R     | R    |
| 5b42930250f5f91012e71f55  | S  | T.A  | T   | T   | L | L   | L | L   | L  | V  | R     | R    |
| 5b4292ee50f5f91012e6fc26  | V  | T    | E   | S   | T | T   | L | L   | L  | R  | R     | R    |
| 5b42930250f5f91012e7220a  | S  | T.A  | T   | T   | L | L   | L | L   | L  | G  | R     | R    |
| 5b42930250f5f91012e71fd4  | S  | T.A  | T   | T   | L | L   | L | L   | L  | R  | R     | R    |
| 5b42930250f5f91012e71cb6  | S  | T.A  | T   | T   | L | L   | L | L   | L  | R  | R     | R    |
| 5b42931550f5f91012e74e72  | S  | T.A  | T   | T   | L | L   | L | L   | L  | R  | R     | R    |
| 5b42931550f5f91012e74b0e  | S  | L    | T.A | T   | T | L   | L | L   | L  | P  | R     | R    |
| 5b42930250f5f91012e720c7  | S  | T.A  | T   | T   | L | L   | L | L   | L  | A  | R     | R    |
| 5b42930250f5f91012e71ddf  | S  | M    | T.A | T   | T | L   | L | L   | L  | R  | R     | R    |
| 5b4292ee50f5f91012e6fdce  | S  | T.A  | W   | T   | T | L   | L | L   | L  | R  | R     | R    |
| 5b4292ee50f5f91012e702a6  | QS | T.A  | T   | T   | L | L   | L | L   | L  | R  | R     | R    |
| 5b42931550f5f91012e74c98  | S  | T.A  | T   | T   | L | L   | L | L   | L  | R  | R     | R    |
| 5b4292ee50f5f91012e6ff4a  | S  | T.A  | T   | T   | L | L   | L | L   | L  | A  | A     | R    |
| 5b4292ee50f5f91012e701e2  | S  | T.A  | T   | T   | L | L   | L | L   | L  | S  | R     | R    |
| 5b42930250f5f91012e71e45  | S  | T.A  | T   | T   | L | L   | L | L   | L  | N  | R     | R    |
| 5b42930250f5f91012e71ea4  | S  | P    | S   | L   | T | T   | L | L   | L  | R  | R     | R    |
| 5b4292ee50f5f91012e70115  | S  | T.A  | T   | T   | L | L   | L | L   | L  | T  | R     | R    |
| 5b4292ee50f5f91012e6fcce  | S  | T.A  | T   | T   | L | L   | L | L   | L  | D  | R     | R    |
| 5b4292ee50f5f91012e6ffcb  | S  | T.A  | T   | T   | L | L   | L | L   | L  | R  | R     | R    |
| 5b42931550f5f91012e74c7a  | R  | TM   | D   | R   | N | A   | A | A   | G  | R  | R     | R    |
| 5b42931550f5f91012e74947  | S  | T.A  | T   | T   | E | L   | L | L   | L  | R  | R     | R    |
| 5b42931550f5f91012e749cb  | S  | T.A  | T   | T   | L | L   | L | L   | L  | R  | R     | R    |
| 5b42930250f5f91012e7220d  | S  | T.A  | T   | T   | L | L   | L | L   | L  | H  | R     | R    |
| 5b42930250f5f91012e721c7  | S  | TMA  | T   | T   | L | L   | L | L   | L  | R  | R     | R    |
| 5b4292ee50f5f91012e700ec  | S  | T.A  | T   | T   | L | L   | L | L   | L  | S  | R     | R    |
| 5b42931550f5f91012e74d56  | S  | T.A  | T   | T   | L | L   | L | L   | L  | A  | R     | R    |
| 5b42931550f5f91012e74b01  | F  | S    | T.A | T   | T | L   | L | L   | L  | D  | R     | R    |
| 5b42930250f5f91012e721fa  | S  | T.A  | T   | T   | L | L   | L | L   | L  | R  | R     | R    |
| 5b42931550f5f91012e74997  | P  | S    | T.A | T   | T | L   | L | L   | L  | R  | R     | R    |
| 5b42931550f5f91012e7494e  | S  | A    | T   | T   | L | L   | L | L   | L  | R  | R     | R    |

|                          |    |     |      |    |    |     |   |
|--------------------------|----|-----|------|----|----|-----|---|
| 5b42931550f5f91012e74be7 | S  | T   | T    | L  | L  | R   | R |
| 5b4292ee50f5f91012e70064 | S  | T   | T    | L  | R  | R   | R |
| 5b42930250f5f91012e71d29 | S  | A   | T    | L  | L  | R   | R |
| 5b42930250f5f91012e71e68 | S  | T   | N    | L  | L  | R   | R |
| 5b42931550f5f91012e74a05 | S  | T   | T    | L  | L  | R   | R |
| 5b4292ee50f5f91012e701d9 | S  | T   | T    | L  | L  | R   | R |
| 5b42930250f5f91012e72188 | S  | T   | R    | L  | L  | R   | R |
| 5b42930250f5f91012e71fa0 | S  | T   | T    | L  | T  | R   | R |
| 5b4292ee50f5f91012e6ffa3 | S  | T   | T    | L  | L  | R   | R |
| 5b42931550f5f91012e74afd | S  | T   | T    | L  | L  | R   | R |
| 5b4292ee50f5f91012e6fcf3 | S  | T   | T    | L  | R  | R   | R |
| 5b42930250f5f91012e71a2d | S  | T   | T    | L  | L  | R   | R |
| 5b4292ee50f5f91012e7001c | S  | A   | T    | L  | L  | R   | R |
| 5b4292ee50f5f91012e702aa | S  | T   | T    | L  | L  | R   | R |
| 5b4292ee50f5f91012e6fe4d | S  | T   | T    | L  | L  | R   | R |
| 5b4292ee50f5f91012e6ff43 | S  | T   | T    | L  | E  | R   | R |
| 5b42930250f5f91012e71b64 | S  | T   | Y    | T  | L  | R   | R |
| 5b42930250f5f91012e71eda | S  | T   | G    | T  | L  | R   | R |
| 5b42931550f5f91012e74fe9 | S  | T   | T    | L  | L  | R   | R |
| 5b42930250f5f91012e71bcd | S  | T   | T    | L  | L  | R   | R |
| 5b42930250f5f91012e71c2b | S  | T   | T    | L  | L  | R   | R |
| 5b42930250f5f91012e71f17 | S  | T   | T    | L  | L  | R   | R |
| 5b42931550f5f91012e74e40 | S  | T   | T    | L  | E  | S   | R |
| 5b42930250f5f91012e722e2 | S  | T   | T    | L  | L  | V   | R |
| 5b4292ee50f5f91012e6ff08 | S  | T   | T    | L  | G  | L   | R |
| 5b42930250f5f91012e71a73 | S  | T   | V    | T  | L  | L   | R |
| 5b4292ee50f5f91012e6fd6e | S  | T   | H    | L  | L  | R   | R |
| 5b42930250f5f91012e71d81 | S  | T   | T    | L  | V  | R   | R |
| 5b42930250f5f91012e71cc6 | S  | T   | T    | L  | A  | R   | R |
| 5b42931550f5f91012e74db1 | S  | P   | T    | L  | L  | R   | R |
| 5b42930250f5f91012e72160 | S  | T   | T    | L  | L  | R   | R |
| 5b42930250f5f91012e7213a | S  | T   | T    | L  | L  | R   | R |
| 5b4292ee50f5f91012e6fd32 | S  | T   | P    | L  | L  | R   | R |
| 5b42930250f5f91012e722cb | S  | T   | T    | L  | S  | R   | R |
| 5b4292ee50f5f91012e70050 | S  | T   | T    | L  | A  | L   | R |
| 5b42930250f5f91012e722d5 | S  | L   | T    | L  | L  | R   | R |
| 5b4292ee50f5f91012e6fbb1 | S  | T   | T    | L  | L  | R   | R |
| 5b42930250f5f91012e71ae3 | S  | T   | T    | L  | L  | Y   | R |
| 5b4292ee50f5f91012e6ff17 | S  | T   | T    | L  | L  | R   | R |
| 5b42931550f5f91012e74ee1 | S  | T   | L    | T  | L  | L   | R |
| 5b42931550f5f91012e74930 | S  | T   | T    | L  | N  | L   | R |
| 5b4292ee50f5f91012e6fef1 | S  | S   | T    | T  | L  | L   | R |
| 5b42931550f5f91012e750dd | A  | DD  | ETE  | E  | L  | R   | R |
| 5b42931550f5f91012e74cc7 | V  | T   | E    | S  | K  | N   | S |
| 5b4292ee50f5f91012e70318 | VS | G   | R    | K  | H  | D   | L |
| 5b42931550f5f91012e74a8e | S  | T   | T    | L  | P  | L   | R |
| 5b42930250f5f91012e71a49 | S  | TLA | T    | P  | L  | R   | R |
| 5b42930250f5f91012e722c2 | S  | P   | A    | T  | L  | L   | R |
| 5b42930250f5f91012e72287 | PP | S   | TLA  | T  | L  | L   | R |
| 5b42930250f5f91012e721bb | S  | M   | T    | L  | L  | R   | R |
| 5b4292ee50f5f91012e6fd59 | S  | T   | T    | L  | L  | R   | R |
| 5b42930250f5f91012e72176 | S  | T   | M    | T  | L  | L   | R |
| 5b42931550f5f91012e74988 | S  | T   | T    | L  | G  | L   | T |
| 5b42930250f5f91012e720d2 | S  | T   | T    | L  | L  | D   | R |
| 5b42931550f5f91012e74b66 | S  | T   | T    | L  | S  | L   | R |
| 5b42930250f5f91012e71f02 | S  | T   | T    | L  | L  | R   | R |
| 5b42930250f5f91012e72260 | S  | E   | T    | T  | L  | L   | R |
| 5b4292ee50f5f91012e6fb99 | S  | T   | T    | L  | L  | R   | R |
| 5b42931550f5f91012e7493b | S  | T   | T    | L  | WA | L   | R |
| 5b4292ee50f5f91012e6fd8b | S  | T   | T    | L  | H  | L   | R |
| 5b42930250f5f91012e720fb | S  | TLA | T    | L  | S  | L   | R |
| 5b42931550f5f91012e74d7c | P  | A   | V    | S  | K  | ARD | L |
| 5b42931550f5f91012e74ca8 | S  | T   | A    | T  | QP | L   | R |
| 5b42931550f5f91012e74c9c | A  | T   | T    | L  | L  | R   | R |
| 5b42930250f5f91012e71d76 | S  | Q   | T    | L  | L  | R   | R |
| 5b42931550f5f91012e74b60 | S  | T   | A    | A  | T  | L   | R |
| 5b42930250f5f91012e7220c | S  | S   | E    | DK | RQ | L   | R |
| 5b42931550f5f91012e74b64 | S  | D   | ENEV | S  | L  | R   | R |
| 5b4292ee50f5f91012e6ff92 | S  | T   | T    | L  | L  | R   | R |
| 5b42931550f5f91012e74960 | S  | A   | T    | T  | L  | L   | R |
| 5b42930250f5f91012e71fcf | S  | P   | A    | T  | L  | L   | R |
| 5b42930250f5f91012e71cd8 | S  | T   | T    | L  | L  | S   | R |
| 5b42931550f5f91012e749a5 | S  | D   | T    | R  | L  | L   | R |
| 5b42931550f5f91012e74c09 | S  | T   | F    | A  | T  | L   | R |
| 5b42930250f5f91012e71ea5 | S  | T   | AR   | T  | L  | L   | R |
| 5b42930250f5f91012e71c33 | S  | T   | T    | T  | L  | D   | R |
| 5b42930250f5f91012e72090 | S  | T   | T    | T  | L  | L   | R |
| 5b42930250f5f91012e71f65 | S  | T   | T    | T  | L  | L   | R |
| 5b42930250f5f91012e71b11 | S  | T   | T    | T  | L  | L   | R |
| 5b42930250f5f91012e71a88 | S  | T   | T    | T  | L  | L   | R |
| 5b4292ee50f5f91012e70330 | S  | KK  | T    | T  | L  | L   | R |
| 5b42930250f5f91012e71eb4 | S  | T   | T    | L  | L  | N   | R |
| 5b42930250f5f91012e71b1f | S  | T   | AD   | GL | H  | A   | F |
| 5b4292ee50f5f91012e6fe23 | S  | A   | T    | MA | T  | L   | L |
| 5b42930250f5f91012e720ec | S  | T   | T    | T  | L  | A   | L |
| 5b42930250f5f91012e71a47 | S  | T   | T    | T  | L  | R   | R |
| 5b42930250f5f91012e71e71 | S  | T   | T    | PT | L  | L   | R |
| 5b42930250f5f91012e71ff6 | P  | S   | T    | D  | T  | L   | R |
| 5b42931550f5f91012e74ee9 | S  | T   | T    | T  | L  | L   | P |
| 5b42930250f5f91012e71cf2 | S  | T   | T    | T  | L  | L   | R |
| 5b42931550f5f91012e74b3a | S  | T   | T    | C  | T  | L   | R |
| 5b4292ee50f5f91012e70076 | S  | T   | T    | T  | L  | V   | T |
| 5b4292ee50f5f91012e6fbed | S  | T   | T    | T  | L  | L   | R |
| 5b42930250f5f91012e71d19 | S  | T   | T    | T  | L  | S   | R |
| 5b42930250f5f91012e71d3e | S  | T   | T    | T  | L  | E   | L |
| 5b42930250f5f91012e72109 | S  | T   | TLA  | T  | T  | L   | R |
| 5b4292ee50f5f91012e700a3 | S  | T   | T    | T  | E  | L   | R |
| 5b42931550f5f91012e74f4f | S  | S   | A    | T  | T  | L   | L |
| 5b4292ee50f5f91012e6fcd3 | S  | T   | T    | D  | T  | L   | L |
| 5b42930250f5f91012e72190 | S  | T   | T    | T  | T  | L   | R |
| 5b42930250f5f91012e722f7 | P  | S   | T    | T  | T  | L   | R |
| 5b4292ee50f5f91012e7007f | S  | T   | T    | K  | T  | L   | R |
| 5b4292ee50f5f91012e701d9 | H  | S   | T    | T  | T  | L   | L |
| 5b42930250f5f91012e71bfb | S  | T   | T    | T  | L  | P   | R |
| 5b4292ee50f5f91012e6fd11 | I  | S   | T    | T  | T  | L   | R |
| 5b42930250f5f91012e722c6 | S  | TLA | S    | T  | T  | L   | R |



|                           |       |     |    |    |    |    |   |   |     |      |   |   |
|---------------------------|-------|-----|----|----|----|----|---|---|-----|------|---|---|
| 5b4292ee50f5f91012e7033a  | S     | T   | A  | T  | T  | L  | L | L | L   | V    | R | R |
| 5b42931550f5f91012e74a0b  | SP    | G   | T  | A  | T  | T  | L | L | L   |      | R | R |
| 5b4292ee50f5f91012e6fef7  | S     | T   | A  | T  | T  | L  | L | L | L   | A    | R | R |
| 5b4292ee50f5f91012e6fcc4  | S     | T   | A  | T  | T  | LM | L | L | L   |      | R | R |
| 5b4292ee50f5f91012e70328  | S     | TSA | T  | T  | T  | L  | L | L | L   |      | R | R |
| 5b42931550f5f91012e75048  | S     | T   | A  | TR | T  | L  | L | L | L   |      | R | R |
| 5b4292ee50f5f91012e70093  | -GV   | S   | T  | A  | T  | T  | L | L | L   |      | R | R |
| 5b4292ee50f5f91012e6fbbb  | S     | T   | A  | T  | T  | D  | L | L | L   |      | R | R |
| 5b42930250f5f91012e71a86  | S     | T   | A  | H  | T  | T  | L | L | L   |      | R | R |
| 5b42930250f5f91012e71df3  | S     | T   | A  | T  | T  | L  | L | L | L   |      | R | R |
| 5b42930250f5f91012e71d64  | D     | S   | T  | A  | T  | T  | L | L | L   |      | R | R |
| 5b42931550f5f91012e74959  | I     | S   | T  | A  | T  | T  | L | L | S   | L    | R | R |
| 5b42930250f5f91012e7214e  | S     | T   | A  | T  | T  | T  | L | L | L   |      | R | R |
| 5b4292ee50f5f91012e6fd1a  | S     | T   | A  | T  | T  | T  | L | L | L   |      | R | R |
| 5b42930250f5f91012e71e11  | S     | T   | A  | T  | T  | LR | L | L | L   |      | R | R |
| 5b42930250f5f91012e71dba  | S     | R   | T  | A  | T  | T  | L | L | L   |      | R | R |
| 5b4292ee50f5f91012e6ff3f  | S     | T   | A  | T  | T  | L  | L | L | N   | L    | R | R |
| 5b42931550f5f91012e74fd3  | S     | T   | A  | T  | T  | L  | L | L | A   |      | R | R |
| 5b42930250f5f91012e71b80  | S     | T   | A  | T  | T  | L  | L | L | S   |      | R | R |
| 5b42930250f5f91012e72257  | S     | T   | A  | TT | T  | L  | L | L | L   |      | R | R |
| 5b42930250f5f91012e71a29  | S     | T   | A  | T  | T  | T  | L | L | L   |      | R | R |
| 5b4292ee50f5f91012e6fcc81 | S     | T   | A  | T  | T  | L  | L | L | L   |      | R | R |
| 5b42930250f5f91012e720f6  | S     | T   | A  | T  | T  | L  | L | L | L   |      | R | R |
| 5b42930250f5f91012e71d7b  | S     | T   | A  | T  | T  | L  | L | L | L   |      | R | R |
| 5b42930250f5f91012e71e38  | F     | S   | T  | A  | T  | T  | L | L | L   |      | R | R |
| 5b42931550f5f91012e74e01  | S     | T   | A  | T  | T  | T  | L | L | L   |      | R | R |
| 5b42931550f5f91012e74d0a  | S     | T   | A  | T  | T  | L  | L | L | LMV |      | R | R |
| 5b4292ee50f5f91012e6ffd5  | S     | T   | A  | T  | T  | L  | L | L | L   | S    | R | R |
| 5b4292ee50f5f91012e6ffe2d | S     | T   | A  | T  | T  | L  | L | L | L   |      | R | R |
| 5b42930250f5f91012e72281  | S     | T   | A  | T  | T  | L  | L | L | L   |      | R | R |
| 5b4292ee50f5f91012e7031b  | S     | T   | A  | T  | T  | L  | L | L | L   | T    | R | R |
| 5b42930250f5f91012e71a58  | S     | T   | A  | T  | T  | L  | L | L | L   |      | R | R |
| 5b4292ee50f5f91012e7004c  | S     | T   | A  | R  | T  | T  | L | L | L   |      | R | R |
| 5b4292ee50f5f91012e6fbc5  | S     | T   | A  | T  | T  | L  | L | L | L   |      | R | R |
| 5b4292ee50f5f91012e6fe16  | S     | T   | A  | T  | T  | L  | L | L | E   | L    | R | R |
| 5b42930250f5f91012e72105  | S     | T   | A  | T  | T  | L  | L | L | L   |      | R | R |
| 5b4292ee50f5f91012e6fe34  | H     | S   | G  | T  | A  | T  | T | L | L   | L    | R | R |
| 5b4292ee50f5f91012e6fe06  | S     | P   | T  | A  | T  | T  | L | L | G   | L    | R | R |
| 5b42930250f5f91012e7212b  | S     | T   | A  | T  | T  | L  | L | L | V   |      | R | R |
| 5b4292ee50f5f91012e7009a  | S     | T   | A  | T  | T  | L  | L | L | L   |      | R | R |
| 5b42930250f5f91012e722ae  | T     | LE  | T  | A  | T  | T  | L | L | L   |      | R | R |
| 5b4292ee50f5f91012e7010b  | S     | T   | A  | T  | T  | L  | L | L | LA  |      | R | R |
| 5b42931550f5f91012e74b86  | S     | T   | A  | T  | T  | L  | L | L | L   |      | R | R |
| 5b42931550f5f91012e74fed  | S     | T   | A  | T  | T  | L  | L | L | L   |      | R | R |
| 5b42931550f5f91012e74a0e  | S     | T   | A  | T  | T  | L  | L | L | L   |      | R | R |
| 5b4292ee50f5f91012e6ffbb  | S     | T   | A  | T  | T  | L  | L | L | L   |      | R | R |
| 5b42930250f5f91012e71afe  | P     | S   | T  | A  | T  | T  | L | L | L   |      | R | R |
| 5b42930250f5f91012e71ff0  | S     | T   | A  | YT | T  | L  | L | L | LL  |      | R | R |
| 5b4292ee50f5f91012e7024c  | S     | T   | A  | T  | T  | L  | L | L | L   | P    | R | R |
| 5b42930250f5f91012e71f2f  | S     | T   | A  | T  | T  | L  | L | L | L   |      | R | R |
| 5b4292ee50f5f91012e6fe7f  | S     | T   | A  | V  | T  | T  | L | L | L   |      | R | R |
| 5b4292ee50f5f91012e6ffff  | R     | S   | T  | A  | T  | T  | L | L | L   |      | R | R |
| 5b42930250f5f91012e72056  | S     | T   | LA | T  | T  | L  | L | L | L   |      | R | R |
| 5b42930250f5f91012e72107  | S     | T   | A  | T  | T  | L  | L | L | L   |      | R | R |
| 5b42930250f5f91012e71d1f  | S     | T   | A  | T  | T  | L  | L | L | L   |      | R | R |
| 5b42931550f5f91012e74c65  | ----- | AT  | T  | T  | L  | L  | L | L | L   |      | R | R |
| 5b4292ee50f5f91012e7026a  | S     | T   | A  | TT | T  | L  | L | L | L   |      | R | R |
| 5b42931550f5f91012e74c7d  | S     | L   | T  | A  | T  | T  | L | L | G   | L    | R | R |
| 5b42930250f5f91012e71bbc  | S     | T   | A  | T  | T  | L  | L | L | L   | H    | R | R |
| 5b4292ee50f5f91012e6fcc98 | S     | L   | T  | A  | T  | T  | L | L | L   |      | R | R |
| 5b42930250f5f91012e720ab  | S     | T   | A  | T  | T  | L  | L | L | L   |      | R | R |
| 5b42930250f5f91012e71cbe  | S     | T   | A  | T  | T  | L  | L | L | L   |      | R | R |
| 5b4292ee50f5f91012e6ff0f  | S     | TF  | N  | N  | T  | I  | F | R | L   |      | R | R |
| 5b42931550f5f91012e74fca  | S     | T   | A  | T  | M  | L  | L | L | L   |      | R | R |
| 5b42930250f5f91012e71bb8  | P     | S   | T  | A  | T  | T  | L | L | L   |      | R | R |
| 5b4292ee50f5f91012e6fcc83 | S     | T   | A  | T  | T  | P  | L | L | L   | H    | R | R |
| 5b4292ee50f5f91012e6fcc9  | S     | T   | A  | T  | T  | L  | L | L | L   |      | R | R |
| 5b42931550f5f91012e750be  | S     | T   | A  | T  | T  | L  | L | L | L   |      | R | R |
| 5b42931550f5f91012e74cad  | S     | T   | A  | T  | T  | L  | L | L | L   | I    | R | R |
| 5b42930250f5f91012e721aa  | S     | T   | A  | T  | T  | L  | L | L | L   |      | R | R |
| 5b42930250f5f91012e71f88  | S     | T   | A  | T  | T  | L  | L | L | L   | A    | R | R |
| 5b42931550f5f91012e74bfb  | S     | T   | A  | T  | T  | L  | L | L | C   |      | R | R |
| 5b4292ee50f5f91012e6fbfb  | S     | T   | A  | T  | T  | L  | L | L | L   | R    | R | R |
| 5b4292ee50f5f91012e6fbfe  | S     | T   | S  | T  | T  | L  | L | L | L   |      | R | R |
| 5b42931550f5f91012e74961  | S     | T   | A  | T  | T  | L  | L | L | LA  |      | R | R |
| 5b42931550f5f91012e74b0f  | S     | T   | A  | T  | T  | LV | L | L | G   |      | R | R |
| 5b42931550f5f91012e74bab  | S     | T   | A  | T  | T  | L  | L | L | K   | L    | R | R |
| 5b42931550f5f91012e74fd3  | S     | T   | A  | T  | T  | L  | L | L | L   |      | R | R |
| 5b4292ee50f5f91012e70194  | S     | T   | A  | T  | T  | L  | L | L | L   |      | R | R |
| 5b42931550f5f91012e74938  | S     | T   | A  | T  | T  | L  | L | L | L   |      | R | R |
| 5b4292ee50f5f91012e6fba8  | S     | T   | A  | T  | T  | L  | L | L | L   |      | R | R |
| 5b42930250f5f91012e71c0a  | S     | T   | A  | T  | T  | L  | L | L | L   |      | R | R |
| 5b4292ee50f5f91012e6fde9  | S     | T   | A  | T  | T  | L  | L | L | H   | L    | R | R |
| 5b4292ee50f5f91012e6fcc88 | S     | T   | A  | D  | T  | T  | L | L | L   |      | R | R |
| 5b42930250f5f91012e71a85  | S     | T   | A  | T  | T  | L  | L | L | L   |      | R | R |
| 5b42931550f5f91012e74d27  | S     | T   | A  | T  | T  | L  | L | L | L   | R    | R | R |
| 5b42930250f5f91012e71db3  | S     | T   | A  | T  | ET | L  | L | L | L   |      | R | R |
| 5b42931550f5f91012e74a19  | S     | T   | A  | T  | T  | L  | L | L | L   |      | R | R |
| 5b4292ee50f5f91012e700bf  | S     | T   | A  | T  | T  | L  | L | L | L   |      | R | R |
| 5b42930250f5f91012e71cb0  | S     | T   | A  | T  | T  | L  | L | L | L   |      | R | R |
| 5b42931550f5f91012e74e06  | S     | T   | A  | T  | T  | L  | L | L | R   | L    | R | R |
| 5b42930250f5f91012e71f38  | S     | T   | A  | T  | T  | L  | L | L | L   |      | R | R |
| 5b42931550f5f91012e74b2d  | S     | T   | A  | T  | T  | L  | L | L | L   |      | R | R |
| 5b42930250f5f91012e7222d  | S     | T   | A  | T  | T  | L  | L | L | L   | G    | R | R |
| 5b42930250f5f91012e720e0  | S     | T   | A  | S  | T  | T  | L | L | L   |      | R | R |
| 5b42931550f5f91012e74eeef | S     | S   | T  | A  | T  | T  | L | L | L   |      | R | R |
| 5b42931550f5f91012e7493e  | S     | S   | T  | A  | T  | T  | L | L | L   | RQSL | R | R |
| 5b42930250f5f91012e71d43  | S     | T   | A  | T  | T  | L  | L | L | L   |      | R | R |
| 5b4292ee50f5f91012e70201  | S     | T   | A  | AT | T  | T  | L | L | L   |      | R | R |
| 5b4292ee50f5f91012e70295  | S     | T   | TA | T  | T  | L  | L | L | L   | V    | R | R |
| 5b4292ee50f5f91012e70299  | S     | P   | T  | A  | T  | T  | L | L | L   |      | R | R |
| 5b4292ee50f5f91012e7013b  | S     | T   | A  | T  | H  | T  | L | L | L   |      | R | R |
| 5b4292ee50f5f91012e70139  | S     | T   | A  | T  | T  | L  | L | L | L   | I    | R | R |
| 5b42930250f5f91012e71f78  | T     | TG  | LK | A  | M  | T  | A | K | A   | T    | R | R |
| 5b42930250f5f91012e7221e  | S     | L   | T  | A  | T  | T  | L | L | L   |      | R | R |
| 5b42931550f5f91012e74d2b  | S     | L   | T  | A  | T  | T  | L | L | E   | N    | R | R |

5b4292ee50f5f91012e6fba4 S . T . A . T . T . H . L . L . L . R . R .  
5b42930250f5f91012e71c30 S . T . A . T . T . L . L . L . H . L . R . R .  
5b4292ee50f5f91012e6fd9b S . T . A . T . T . RT . L . L . L . R . R .  
5b42931550f5f91012e74d26 F . S . T . A . TR . T . L . L . L . R . R .  
5b42931550f5f91012e75069 S . T . A . T . T . L . L . L . A . K . R . R .  
5b42930250f5f91012e71ae4 S . TT . A . T . T . L . L . L . R . R .  
5b42930250f5f91012e71ee6 S . T . A . T . T . L . L . L . T . R . R .  
5b42931550f5f91012e74df3 S . M . T . A . T . T . L . L . L . R . R .  
5b42930250f5f91012e71fcb S . T . A . T . T . C . T . L . L . L . R . R .  
5b42931550f5f91012e74e5b S . T . A . T . T . S . CL . L . L . R . R .  
5b42931550f5f91012e74c29 S . T . A . T . T . L . L . L . R . R .  
5b42930250f5f91012e71ee3 S . T . A . T . T . L . L . L . R . R .  
5b42930250f5f91012e71efe S . T . A . T . T . T . L . L . L . I . R . R .  
5b42930250f5f91012e71ce6 S . T . A . D . T . T . L . L . L . A . R . R .  
5b42930250f5f91012e71f9e S . K . S . T . Q . L . L . L . R . R .  
5b42931550f5f91012e74ab7 S . T . A . T . T . T . L . L . L . R . R .  
5b42930250f5f91012e721b6 S . T . A . T . R . T . L . L . L . R . R .  
5b42930250f5f91012e71fc8 S . T . A . T . T . T . L . L . L . R . R . L .  
5b4292ee50f5f91012e7025c S . T . A . T . T . L . L . L . H . R . R .  
5b42931550f5f91012e7494a S . T . AR . T . T . LR . L . L . R . R .  
5b4292ee50f5f91012e6ffec S . T . A . K . YT . T . L . L . L . R . R .  
5b42930250f5f91012e71bc4 S . T . AY . T . T . L . L . L . R . R .  
5b42930250f5f91012e71d23 S . T . A . T . T . L . L . S . R . R .  
5b42930250f5f91012e7203a E . S . T . A . T . T . L . L . L . R . R .  
5b4292ee50f5f91012e700fb S . T . A . F . T . T . L . L . L . R . R .  
5b42930250f5f91012e72182 S . T . A . T . T . T . L . L . L . R . R .  
5b42930250f5f91012e721cd S . T . A . T . T . L . L . L . A . R . R .  
5b4292ee50f5f91012e70323 S . R . TM . D . R . N . L . A . A . VG . R . R .  
5b42930250f5f91012e72125 S . T . A . T . T . T . L . L . L . R . R .  
5b42931550f5f91012e74a29 S . T . A . T . T . T . L . L . L . R . R .  
5b4292ee50f5f91012e6fec0 Y . T . A . T . T . L . L . L . R . R .  
5b42930250f5f91012e71ae0 S . T . A . E . T . T . L . L . L . R . R .  
5b4292ee50f5f91012e7002e S . T . P . T . T . L . L . L . R . R .  
5b4292ee50f5f91012e6fdb9 S . T . A . T . T . L . L . L . G . R . R .  
5b4292ee50f5f91012e6ff0a S . T . A . T . T . L . L . L . D . R . R .  
5b42930250f5f91012e71b1d S . T . A . PT . T . L . L . L . R . R .  
5b4292ee50f5f91012e6ff0b S . T . T . A . T . T . L . L . L . R . R .  
5b42931550f5f91012e7507f S . T . A . T . T . L . L . L . Y . R . R .  
5b42930250f5f91012e722a4 S . T . A . T . T . T . L . L . L . Q . R . R .  
5b42930250f5f91012e7227f S . T . A . T . T . L . L . L . R . R .  
5b42931550f5f91012e74f57 S . T . A . T . T . L . L . L . R . R .  
5b42930250f5f91012e72234 S . T . A . T . T . L . L . L . G . G . R . R .  
5b42931550f5f91012e74dfb S . T . AF . T . T . L . L . L . R . R .  
5b4292ee50f5f91012e6ffc3c -L . T . A . T . T . L . L . L . R . R .  
5b42931550f5f91012e749d5 SL . T . A . T . T . L . L . L . R . R .  
5b42930250f5f91012e72123 S . T . A . T . T . L . L . L . E . R . R .  
5b4292ee50f5f91012e6fc3b S . T . A . T . T . D . L . A . L . R . R .  
5b4292ee50f5f91012e70121 S . T . A . T . T . L . L . L . R . R .  
5b42930250f5f91012e71b2b S . T . A . S . T . T . L . L . L . R . R .  
5b42930250f5f91012e72086 S . T . A . T . T . T . L . L . T . R . R .  
5b4292ee50f5f91012e6fc74 S . T . A . T . T . T . L . L . L . R . R .  
5b4292ee50f5f91012e6fbbba S . T . A . T . T . L . L . L . I . R . R .  
5b4292ee50f5f91012e6fddb S . T . A . T . T . S . L . L . L . R . R .  
5b42930250f5f91012e71ee5 S . T . A . T . T . L . L . L . R . R .  
5b4292ee50f5f91012e6ffcc S . T . A . YT . T . L . L . L . R . R .  
5b42930250f5f91012e71b8e S . T . A . T . T . P . L . L . L . R . R .  
5b4292ee50f5f91012e6fc1a M . S . T . A . T . T . L . L . L . R . R .  
5b4292ee50f5f91012e70237 S . T . A . T . T . L . L . F . L . R . R .  
5b4292ee50f5f91012e6ff70 S . L . T . A . T . T . L . L . L . R . R .  
5b42930250f5f91012e72201 S . L . T . A . PT . T . L . L . L . R . R .  
5b4292ee50f5f91012e6fdef S . T . A . T . T . L . L . L . P . R . R .  
5b4292ee50f5f91012e6fe21 S . T . A . T . T . L . L . L . R . R .  
5b42930250f5f91012e71c5b S . T . A . T . T . T . L . L . L . R . R .  
5b42931550f5f91012e749ef S . T . A . N . T . T . L . L . L . R . R .  
5b42930250f5f91012e71a90 S . T . A . T . T . L . L . L . R . R .  
5b42930250f5f91012e7221c S . T . A . T . T . L . L . L . A . G . R . R .  
5b4292ee50f5f91012e6fbb3 S . T . A . T . T . L . L . L . T . R . R .  
5b4292ee50f5f91012e6fc17 S . T . A . T . T . L . V . L . R . R .  
5b42931550f5f91012e74ebd S . T . A . T . T . L . L . L . R . R .  
5b4292ee50f5f91012e6fd74 S . T . A . T . T . L . L . L . R . R .  
5b4292ee50f5f91012e6fdf8 S . P . T . LA . T . T . L . L . L . R . R .  
5b42930250f5f91012e7219f I . S . T . A . T . T . L . L . L . R . R .  
5b42930250f5f91012e71b7a S . T . A . T . T . L . L . L . R . R .  
5b42931550f5f91012e74bbd S . T . A . T . T . L . L . L . R . R .  
5b4292ee50f5f91012e6fffa S . T . A . T . T . L . L . L . R . R .  
5b4292ee50f5f91012e6fcdb S . T . A . T . T . T . L . L . L . R . R .  
5b42931550f5f91012e74e47 S . T . A . T . T . L . L . L . S . R . R .  
5b42930250f5f91012e71a45 V . S . T . S . RQ . G . D . S . H . NNR . L . R . R .  
5b4292ee50f5f91012e700d9 S . T . A . E . TN . R . V . N . L . R . R .  
5b4292ee50f5f91012e7011e S . Q . T . A . T . T . L . L . L . R . R .  
5b4292ee50f5f91012e6fe52 S . T . A . T . T . L . L . L . W . R . R .  
5b42931550f5f91012e74e44 S . T . A . T . T . L . L . L . R . R .  
5b4292ee50f5f91012e6fee6 S . T . A . T . T . L . LP . L . R . R .  
5b4292ee50f5f91012e70091 T . TG . LK . A . M . T . A . K . A . T . R . R .  
5b42930250f5f91012e72030 S . T . A . T . T . L . L . L . R . R .  
5b42931550f5f91012e74bd0 S . T . A . T . T . L . L . L . DQA - DRP . R . R .  
5b42930250f5f91012e71a8d S . T . A . T . T . S . LL . L . L . R . R .  
5b42931550f5f91012e7492b S . T . A . T . T . L . L . L . R . R .  
5b42930250f5f91012e7215f S . T . A . T . T . L . L . DW . R . R .  
5b4292ee50f5f91012e6fe1f S . T . A . T . T . L . L . K . R . R .  
5b42930250f5f91012e72193 S . T . A . T . T . L . L . L . R . R .  
5b42930250f5f91012e721a7 S . S . T . A . T . T . L . L . L . R . R .  
5b42931550f5f91012e74982 S . SA . T . A . T . T . L . L . L . R . R .  
5b42931550f5f91012e74b4f S . T . A . T . T . L . L . R . R .  
5b42930250f5f91012e71bc9 TS . T . A . T . T . L . L . L . R . R .  
5b4292ee50f5f91012e70343 S . E . K . AE . N . E . L . L . R . R .  
5b42930250f5f91012e72047 S . A . T . A . T . T . L . L . L . R . R .  
5b42930250f5f91012e7214f S . T . A . T . T . L . L . Y . R . R .  
5b42930250f5f91012e722a3 S . T . A . T . T . L . QL . R . R .  
5b42931550f5f91012e74be0 S . T . A . T . T . L . L . S . R . R .  
5b4292ee50f5f91012e6fd0d S . T . A . T . T . L . L . L . R . R .  
5b4292ee50f5f91012e6fbe5 A . S . T . A . T . T . L . G . L . R . R .  
5b42930250f5f91012e71d2e S . T . A . T . T . L . L . W . R . R .  
5b42931550f5f91012e74db5 S . T . A . T . T . L . A . L . R . R .  
5b42931550f5f91012e74d67 S . T . A . T . LT . L . L . R . R .  
5b4292ee50f5f91012e6ff3d S . T . A . T . T . L . L . D . R . R .

|                           |    |      |        |       |     |     |   |     |
|---------------------------|----|------|--------|-------|-----|-----|---|-----|
| 5b42930250f5f91012e720d6  | S  | T.A  | T      | L     | L   | L   | R | R   |
| 5b4292ee50f5f91012e70065  | L  | T.S  | RR.DAQ | R     | I   | L.H | V | R   |
| 5b4292ee50f5f91012e701b6  | S  | T.A  | R.T    | R     | L   | L   | R | R   |
| 5b42930250f5f91012e721e3  | S  | T.A  | T      | T     | L   | N   | L | R   |
| 5b4292ee50f5f91012e6fbb0  | A  | K    | RS     | R     |     |     |   | R   |
| 5b42930250f5f91012e722d4  | S  | T.A  | T      | T     | L   |     | T | R   |
| 5b42930250f5f91012e71d99  | C  | T.A  | T      | T     | L   |     |   | R   |
| 5b42930250f5f91012e72102  | S  | T.A  | T      | T     | L   |     |   | R   |
| 5b4292ee50f5f91012e70257  | S  | T.A  | T      | T     | L   |     |   | R   |
| 5b4292ee50f5f91012e6fdf4  | S  | R    | T      | T     | L   |     |   | R   |
| 5b4292ee50f5f91012e7032e  | S  | T.A  | T      | T     | L.L |     |   | R   |
| 5b4292ee50f5f91012e6fc71  | S  | T.A  | T      | T     | L   | A   |   | R   |
| 5b42930250f5f91012e71ac8  | S  | T.A  | T      | T     | L   |     |   | D   |
| 5b4292ee50f5f91012e6fe6c  | S  | T.A  | T      | T     | L   |     |   | R   |
| 5b42931550f5f91012e74bf4  | S  | T.A  | T      | T     | L   |     |   | R   |
| 5b42930250f5f91012e71b20  | A  | S    | T.A    | T     | T   | L   |   | R   |
| 5b4292ee50f5f91012e7006c  |    |      |        |       |     |     |   | R   |
| 5b4292ee50f5f91012e700a0  | P  | S    | T.A    | T     | T   | L   |   | R   |
| 5b4292ee50f5f91012e6fe64  | S  | T.A  | T      | T     | L   | G   |   | R   |
| 5b42930250f5f91012e71f41  | S  | T.A  | T      | T     | L   |     |   | R   |
| 5b42930250f5f91012e72271  | S  | T.A  | T      | T     | L   |     |   | R   |
| 5b42930250f5f91012e71cdf  | S  | T.A  | T      | T     | L   |     |   | R   |
| 5b4292ee50f5f91012e70142  | S  | T.A  | T      | T     | L   |     |   | R   |
| 5b42931550f5f91012e74ab2  | S  | T.AG | T      | T     | L   |     |   | R   |
| 5b4292ee50f5f91012e6ff14  | SP | T.A  | T      | T     | L   |     |   | R   |
| 5b42930250f5f91012e71cd9  | A  | K    | G.S    | K.G.Q | R   |     |   | R   |
| 5b4292ee50f5f91012e6feba  |    |      |        |       |     | P   |   | R   |
| 5b42930250f5f91012e71be1  | S  | T.A  | R      | T     | L   |     |   | R   |
| 5b4292ee50f5f91012e6ff44  | S  | T.A  | T      | T     | L   | LTI |   | R   |
| 5b4292ee50f5f91012e6fe49  | T  | LE   | T.A    | T     | T   | L   |   | R   |
| 5b42930250f5f91012e72282  | S  | T.V  | T      | T     | L   |     |   | R   |
| 5b42930250f5f91012e71c7f  | S  | T.A  | T      | T     | L   |     |   | R   |
| 5b42930250f5f91012e71fbc  | S  | T.A  | T      | T     | L.F |     |   | R   |
| 5b4292ee50f5f91012e6fddc  | S  | T.A  | T      | T     | L   |     |   | R   |
| 5b42931550f5f91012e74f98  | S  | T.A  | T      | T     | L   |     |   | R   |
| 5b42930250f5f91012e71b51  | K  | S    | T      | T     | L   |     |   | R   |
| 5b42930250f5f91012e71a57  | TF | N.N  |        | I     | F.R | N   |   | R   |
| 5b42930250f5f91012e71d55  | K  | S    | Q      | L     | L   |     |   | R   |
| 5b4292ee50f5f91012e6ffc0a | S  | T.P  | T      | T     | L   |     |   | R   |
| 5b42930250f5f91012e7217e  | S  | T.A  | T      | T     | L   |     |   | R   |
| 5b42930250f5f91012e720b4  | S  | T.A  | T      | T     | L   | H   |   | R   |
| 5b4292ee50f5f91012e702ed  | S  | T.A  | T      | M     | L   |     |   | R   |
| 5b42931550f5f91012e750f2  | A  | S    | R      | T     | L   |     |   | R   |
| 5b42931550f5f91012e74b55  |    |      |        |       |     |     |   | R   |
| 5b4292ee50f5f91012e6fd6a  | S  | T.A  | T      | T     | L   |     |   | R   |
| 5b42930250f5f91012e71d3c  | S  | T.A  | TR     | T     | L   |     |   | R   |
| 5b42930250f5f91012e722e0  | S  | T.A  | T      | T     | L   |     |   | R   |
| 5b42930250f5f91012e71aea  | S  | T.A  | T      | T     | L   | S   |   | R   |
| 5b42931550f5f91012e74caa  |    |      |        |       |     |     |   | R   |
| 5b42930250f5f91012e72144  | S  | T.A  | T      | T     | L   |     |   | R   |
| 5b4292ee50f5f91012e70315  | S  | T.A  | T      | T     | L   |     |   | R   |
| 5b4292ee50f5f91012e701e7  | S  | T.A  | T      | T     | L   | T   |   | R   |
| 5b42930250f5f91012e720f7  | S  | TSA  | T      | T     | L   | A   |   | R   |
| 5b4292ee50f5f91012e6fe09  | S  | T.A  | T      | T     | L   |     |   | R   |
| 5b42931550f5f91012e74a8d  | S  | T.A  | T      | T     | L   |     |   | R   |
| 5b42930250f5f91012e7204b  | S  | T.A  | T      | T     | L   |     |   | R   |
| 5b4292ee50f5f91012e6fd36  | S  | T.A  | Y      | T     | L   |     |   | R   |
| 5b42931550f5f91012e74b70  | P  | S    | P      | T.A   | T   | T   | L | R   |
| 5b4292ee50f5f91012e6fcd4  |    |      |        |       |     |     |   | R   |
| 5b42930250f5f91012e721c1  | S  | T.A  | W      | T     | T   | L   |   | R   |
| 5b42931550f5f91012e74c50  | S  | T.A  | T      | T     | L   |     |   | R   |
| 5b42930250f5f91012e71a5e  | T  | T    | TG.LK  | A     | M   | T.A | L | K.A |
| 5b4292ee50f5f91012e7021b  | R  | D    | G      | T     | L   |     |   | R   |
| 5b42931550f5f91012e74c7b  | S  | T.A  | TR     | T     | L   |     |   | R   |
| 5b42930250f5f91012e71fe0  | S  | T.D  | T      | T     | L   |     |   | R   |
| 5b42931550f5f91012e74d29  | S  | T.A  | T      | T     | L   |     |   | R   |
| 5b42931550f5f91012e749d1  | S  | T.A  | T      | T     | L   |     |   | R   |
| 5b4292ee50f5f91012e70098  | S  | T.A  | T      | T     | L   |     | N | R   |
| 5b42931550f5f91012e74c18  | A  | SV   | E.DQV  | R.NL  | T   | L   |   | R   |
| 5b42930250f5f91012e71afc  |    |      |        |       |     | H   |   | R   |
| 5b4292ee50f5f91012e6fcc   | A  | S    | R      |       | V   | L   |   | R   |
| 5b42930250f5f91012e71a93  | S  | T.A  | T      | T     | L   |     |   | R   |
| 5b42931550f5f91012e74be3  | S  | T.A  | TV     | T     | L   |     |   | R   |
| 5b42931550f5f91012e749c8  | S  | T.A  | T      | T     | CL  | L   |   | R   |
| 5b42930250f5f91012e71e6a  | S  | T.A  | T      | T     | L   |     |   | R   |
| 5b42930250f5f91012e71ac2  | S  | T.A  | TI     | T     | L   |     |   | R   |
| 5b42930250f5f91012e71cde  | S  | T.A  | T      | T     | L   | LY  |   | R   |
| 5b42931550f5f91012e74d1a  | K  | FE   | R      | L     | T   |     |   | R   |
| 5b42930250f5f91012e7218d  | S  | T.A  | T      | T     | L   |     | G | R   |
| 5b42931550f5f91012e74c1b  | S  | T.A  | T      | T     | L   |     |   | R   |
| 5b4292ee50f5f91012e6feed  | S  | P    | T.A    | T     | T   | L   |   | R   |
| 5b4292ee50f5f91012e6fd16  | S  | T.A  | T      | T     | L   |     |   | R   |
| 5b42930250f5f91012e71aaf  | S  | T.A  | T      | T     | L   |     |   | R   |
| 5b42930250f5f91012e71dd9  | S  | T.A  | T      | T     | L   |     | W | R   |
| 5b4292ee50f5f91012e6ff94  | S  | T.A  | E.D    | AA    | H   | R   |   | R   |
| 5b42930250f5f91012e71ee8  | S  | T.A  | T      | T     | L   | L   |   | R   |
| 5b42930250f5f91012e72185  | S  | T.A  | T      | T     | L   |     |   | R   |
| 5b42930250f5f91012e71d3f  | S  | T.A  | T      | T     | L   | A   |   | R   |
| 5b4292ee50f5f91012e700e9  | S  | T.A  | T      | T     | L   |     |   | R   |
| 5b4292ee50f5f91012e6fd40  | D  | R    | N      |       | F.N | L   |   | R   |
| 5b4292ee50f5f91012e6ff20  | L  | S    | G      | T.A   | PT  | T   | L | R   |
| 5b42930250f5f91012e7212a  | S  | T.A  | T      | T     | L   | Y   |   | R   |
| 5b42931550f5f91012e750a1  |    |      |        |       |     |     |   | R   |
| 5b42931550f5f91012e74c96  | S  | T.A  | T      | T     | L   |     |   | R   |
| 5b42931550f5f91012e74ddc  | S  | T.A  | T      | T     | L   | R   |   | R   |
| 5b42931550f5f91012e7500c  | S  | T.A  | T      | T     | P   | L   |   | R   |
| 5b42930250f5f91012e71f0e  | S  | T.A  | T      | T     | L   |     |   | R   |
| 5b4292ee50f5f91012e6fe5f  | S  | T.A  | T      | KT    | L   |     |   | R   |
| 5b4292ee50f5f91012e7018e  | T  | LE   | D      | R     | I   | L   |   | R   |
| 5b42930250f5f91012e72272  | S  | T.A  | T      | T     | L   |     |   | R   |
| 5b42931550f5f91012e74fbc  | S  | G    | I      |       | F.Y |     |   | R   |
| 5b42931550f5f91012e74ac1  | S  | T.A  | T      | T     | L   |     |   | R   |
| 5b42930250f5f91012e71e49  | S  | T.A  | T      | T     | L   |     |   | R   |
| 5b4292ee50f5f91012e702b2  | S  | T.A  | T      | T     | L   |     |   | R   |
| 5b42930250f5f91012e71e46  | S  | T.A  | T      | T     | L   | A   |   | R   |
| 5b4292ee50f5f91012e6ffce  | R  | T    | T      | T     | L   |     |   | R   |

|                          |    |     |     |    |    |    |   |    |
|--------------------------|----|-----|-----|----|----|----|---|----|
| 5b4292ee50f5f91012e6fd67 | S  | T   | T   | L  | L  | L  | R | R  |
| 5b42931550f5f91012e74dae | S  | T   | T   | L  | P  | L  | R | R  |
| 5b4292ee50f5f91012e6fcfa | S  | T   | T   | L  | L  | Y  | R | R  |
| 5b4292ee50f5f91012e6ff40 | S  | T   | T   | L  | L  | G  | R | R  |
| 5b42930250f5f91012e71b2f | S  | T   | T   | L  | L  | V  | R | R  |
| 5b42931550f5f91012e74929 | S  | T   | T   | L  | L  | G  | R | R  |
| 5b4292ee50f5f91012e6fc82 | S  | T   | T   | L  | L  | V  | R | R  |
| 5b4292ee50f5f91012e6fdfa | R  | S   | T   | T  | L  | L  | R | R  |
| 5b4292ee50f5f91012e6fdc9 | S  | T   | T   | L  | L  | Y  | R | R  |
| 5b42930250f5f91012e72225 | S  | T   | T   | L  | L  | Y  | R | R  |
| 5b42930250f5f91012e71cad | S  | P   | T   | T  | L  | L  | R | R  |
| 5b42930250f5f91012e71f87 | S  | T   | T   | L  | L  | V  | R | R  |
| 5b42931550f5f91012e75079 | S  | T   | T   | L  | L  | A  | R | R  |
| 5b42931550f5f91012e749c2 | S  | T   | T   | L  | L  | N  | R | R  |
| 5b4292ee50f5f91012e7026d | S  | T   | T   | L  | L  | L  | R | R  |
| 5b42931550f5f91012e74bf7 | S  | T   | T   | L  | L  | Q  | R | R  |
| 5b4292ee50f5f91012e6fef9 | R  | T   | T   | L  | L  | L  | R | R  |
| 5b4292ee50f5f91012e7033d | S  | T   | T   | L  | TQ | L  | R | R  |
| 5b42930250f5f91012e71ddf | S  | T   | T   | L  | L  | L  | R | R  |
| 5b42931550f5f91012e74a7a | S  | T   | T   | L  | L  | L  | R | R  |
| 5b42930250f5f91012e72022 | S  | T   | T   | L  | L  | L  | R | R  |
| 5b42931550f5f91012e75052 | F  | T   | T   | L  | L  | L  | R | R  |
| 5b42930250f5f91012e722cc | S  | T   | T   | L  | L  | L  | R | R  |
| 5b42931550f5f91012e74cbc | S  | A   | T   | T  | L  | Y  | R | R  |
| 5b4292ee50f5f91012e6ff4f | S  | T   | T   | L  | L  | L  | R | R  |
| 5b42931550f5f91012e74da1 | S  | T   | T   | L  | L  | L  | R | R  |
| 5b42930250f5f91012e71df5 | S  | T   | T   | L  | L  | L  | R | R  |
| 5b42931550f5f91012e74d42 | S  | T   | T   | L  | L  | P  | R | R  |
| 5b4292ee50f5f91012e6ff1c | S  | S   | R   | T  | L  | V  | R | R  |
| 5b42930250f5f91012e71ff6 | S  | T   | T   | L  | L  | W  | R | R  |
| 5b4292ee50f5f91012e6fc7a | S  | T   | T   | L  | L  | A  | R | R  |
| 5b42930250f5f91012e7217b | S  | TFA | T   | L  | L  | L  | R | R  |
| 5b4292ee50f5f91012e6fda1 | S  | T   | T   | L  | L  | L  | R | R  |
| 5b42930250f5f91012e71f90 | S  | T   | T   | LL | L  | L  | R | R  |
| 5b4292ee50f5f91012e6fc87 | S  | M   | T   | T  | S  | L  | R | R  |
| 5b42931550f5f91012e749d2 | S  | T   | T   | L  | L  | L  | R | R  |
| 5b4292ee50f5f91012e70272 | S  | T   | T   | L  | L  | A  | R | R  |
| 5b42930250f5f91012e71bbb | SS | T   | T   | L  | L  | L  | R | R  |
| 5b4292ee50f5f91012e701b9 | S  | T   | T   | L  | L  | L  | R | R  |
| 5b42930250f5f91012e72018 | S  | T   | T   | L  | G  | L  | R | R  |
| 5b4292ee50f5f91012e6fc9f | S  | T   | AY  | T  | R  | T  | R | R  |
| 5b42931550f5f91012e74f2b | S  | P   | A   | T  | T  | L  | R | R  |
| 5b42930250f5f91012e71dbf | S  | T   | C   | T  | L  | L  | R | R  |
| 5b42930250f5f91012e71c5d | S  | T   | T   | L  | L  | L  | R | R  |
| 5b42931550f5f91012e74d4d | S  | T   | T   | L  | L  | L  | R | R  |
| 5b42930250f5f91012e71a39 | S  | T   | T   | L  | L  | L  | R | R  |
| 5b42930250f5f91012e72041 | S  | T   | A   | H  | T  | L  | R | R  |
| 5b42930250f5f91012e71ed1 | S  | T   | T   | L  | G  | L  | R | R  |
| 5b42930250f5f91012e71b6a | S  | T   | T   | L  | L  | L  | R | R  |
| 5b42930250f5f91012e71f93 | S  | T   | T   | L  | L  | L  | R | R  |
| 5b42930250f5f91012e71ff9 | S  | T   | T   | L  | L  | A  | S | R  |
| 5b42930250f5f91012e71fb9 | S  | T   | T   | L  | L  | S  | R | R  |
| 5b42930250f5f91012e71f57 | S  | T   | A   | I  | T  | L  | R | R  |
| 5b42930250f5f91012e71fb7 | S  | T   | T   | L  | L  | L  | R | R  |
| 5b42930250f5f91012e722f2 | S  | T   | T   | L  | L  | A  | R | R  |
| 5b42930250f5f91012e720f8 | S  | T   | AF  | T  | T  | L  | R | R  |
| 5b42930250f5f91012e71f47 | S  | T   | T   | L  | L  | L  | R | R  |
| 5b4292ee50f5f91012e6feee | S  | T   | T   | H  | T  | L  | R | R  |
| 5b42931550f5f91012e74b9d | S  | T   | T   | L  | L  | L  | R | R  |
| 5b42930250f5f91012e722c0 | S  | T   | T   | L  | L  | QL | R | R  |
| 5b4292ee50f5f91012e70060 | S  | T   | T   | L  | L  | L  | R | R  |
| 5b4292ee50f5f91012e700d2 | S  | T   | T   | S  | L  | L  | R | R  |
| 5b4292ee50f5f91012e6ff60 | S  | T   | T   | L  | L  | A  | I | R  |
| 5b42931550f5f91012e74a5b | H  | S   | P   | A  | T  | T  | R | R  |
| 5b4292ee50f5f91012e701e6 | S  | T   | T   | L  | L  | L  | R | R  |
| 5b42930250f5f91012e71e19 | S  | T   | T   | L  | L  | L  | R | R  |
| 5b42931550f5f91012e74d5e | S  | T   | T   | L  | L  | L  | R | R  |
| 5b42930250f5f91012e71d65 | S  | T   | T   | L  | L  | I  | R | R  |
| 5b42930250f5f91012e71f85 | S  | T   | T   | L  | L  | Y  | R | R  |
| 5b42930250f5f91012e71ebc | S  | T   | T   | L  | L  | L  | R | R  |
| 5b42931550f5f91012e74def | S  | P   | T   | T  | L  | L  | R | R  |
| 5b42931550f5f91012e75061 | S  | T   | PT  | T  | L  | L  | R | R  |
| 5b42931550f5f91012e75060 | S  | T   | T   | L  | L  | A  | R | R  |
| 5b42931550f5f91012e750f5 | S  | T   | AR  | T  | T  | L  | R | R  |
| 5b42930250f5f91012e71a38 | S  | T   | T   | L  | A  | L  | R | R  |
| 5b42931550f5f91012e74ee8 | S  | T   | T   | L  | L  | L  | R | R  |
| 5b4292ee50f5f91012e70339 | S  | L   | T   | T  | L  | L  | R | R  |
| 5b4292ee50f5f91012e6ffe2 | S  | T   | T   | L  | A  | L  | R | R  |
| 5b42930250f5f91012e721f0 | S  | T   | T   | L  | L  | L  | R | R  |
| 5b4292ee50f5f91012e70079 | S  | T   | AD  | GL | H  | A  | F | NT |
| 5b4292ee50f5f91012e6fba7 | S  | T   | T   | L  | L  | L  | R | R  |
| 5b42930250f5f91012e71c26 | S  | T   | A   | R  | T  | L  | R | R  |
| 5b4292ee50f5f91012e700a7 | S  | T   | T   | L  | L  | L  | R | R  |
| 5b42931550f5f91012e74bfd | S  | T   | T   | L  | L  | L  | R | R  |
| 5b42930250f5f91012e71c60 | S  | T   | T   | L  | L  | L  | R | R  |
| 5b42931550f5f91012e749d4 | S  | T   | T   | L  | L  | W  | R | R  |
| 5b42930250f5f91012e72048 | S  | R   | T   | T  | L  | L  | R | R  |
| 5b4292ee50f5f91012e700f3 | S  | TTA | T   | T  | L  | L  | R | R  |
| 5b4292ee50f5f91012e6ff5b | S  | T   | T   | L  | L  | L  | R | R  |
| 5b42930250f5f91012e72080 | S  | T   | T   | L  | L  | N  | R | R  |
| 5b4292ee50f5f91012e6fbaa | LS | T   | T   | L  | L  | L  | R | R  |
| 5b42931550f5f91012e75094 | P  | S   | T   | T  | L  | L  | R | R  |
| 5b4292ee50f5f91012e7013c | S  | T   | T   | L  | L  | K  | R | R  |
| 5b42930250f5f91012e71b9d | S  | T   | T   | L  | L  | I  | R | R  |
| 5b4292ee50f5f91012e6ff65 | S  | T   | AW  | T  | T  | L  | R | R  |
| 5b42930250f5f91012e71db0 | S  | T   | T   | L  | H  | L  | R | R  |
| 5b42930250f5f91012e721ac | S  | T   | T   | L  | V  | L  | R | R  |
| 5b42930250f5f91012e71c95 | S  | T   | T   | L  | L  | L  | R | R  |
| 5b42930250f5f91012e71f34 | S  | T   | T   | L  | L  | L  | R | R  |
| 5b42931550f5f91012e74aec | S  | T   | T   | L  | L  | L  | R | R  |
| 5b42931550f5f91012e74b81 | S  | L   | T   | T  | L  | L  | S | R  |
| 5b4292ee50f5f91012e6ff66 | S  | T   | M   | T  | T  | L  | R | R  |
| 5b42930250f5f91012e71efa | S  | T   | T   | L  | L  | W  | R | R  |
| 5b4292ee50f5f91012e70344 | S  | T   | TLA | T  | T  | L  | R | R  |
| 5b4292ee50f5f91012e701fc | S  | T   | T   | L  | L  | L  | R | R  |
| 5b4292ee50f5f91012e7008e | S  | T   | T   | L  | L  | L  | R | R  |
| 5b42930250f5f91012e7211f | S  | D   | T   | T  | L  | L  | R | R  |

5b4292ee50f5f91012e71f31 S . T . A . . . . . T . T . L . . . . . L . . . . . R . . R .  
5b42930250f5f91012e71f31 S . . . . . T . A . E . . . . . T . T . L . . . . . L . R . . . . . R . . R .  
5b4292ee50f5f91012e702ee S . . . . . T . A . . . . . T . T . L . . . . . L . K . . . . . R . . R .  
5b42930250f5f91012e71a5b S . . . . . T . A . . . . . T . T . L . . . . . L . . . . . R . . R .  
5b42930250f5f91012e71c89 S . . . . . T . A . . . . . T . T . L . . . . . L . . . . . R . . R .  
5b4292ee50f5f91012e6fd54 S . . . . . T . A . . . . . T . T . L . . . . . E . . . . . L . . . . . R . . R .  
5b42931550f5f91012e74cf9 S . . . . . E . . . . . D . . . . . T . T . L . . . . . L . . . . . R . . R .  
5b4292ee50f5f91012e6ff8c F . S . . . . . T . A . . . . . T . T . L . . . . . L . . . . . R . . R .  
5b42930250f5f91012e71fcd S . . . . . T . A . . . . . T . T . L . . . . . L . . . . . R . . R .  
5b4292ee50f5f91012e6fd47 S . . . . . T . A . . . . . T . T . L . . . . . S . . . . . P . . . . . R . . R .  
5b4292ee50f5f91012e70327 S . . . . . TLA . . . . . T . T . L . . . . . L . . . . . R . . R .  
5b4292ee50f5f91012e70007 S . . . . . T . A . . . . . T . T . L . . . . . L . . . . . R . . R .  
5b42930250f5f91012e71c5e S . . . . . T . A . . . . . T . T . L . . . . . Q . . . . . L . . . . . R . . R .  
5b42930250f5f91012e71c47 S . . . . . T . A . . . . . T . T . L . . . . . L . . . . . R . . R .  
5b4292ee50f5f91012e70228 S . . . . . T . A . S . . . . . T . T . L . . . . . L . . . . . R . . R .  
5b4292ee50f5f91012e7022a S . . . . . T . A . . . . . T . T . L . . . . . LF . . . . . R . . R .  
5b4292ee50f5f91012e6fdca S . . . . . T . A . . . . . T . T . L . . . . . L . . . . . K . . . . . R . . R .  
5b42930250f5f91012e7210c S . . . . . T . A . . . . . T . T . L . . . . . G . . . . . R . . R .  
5b4292ee50f5f91012e6ffdb S . . . . . T . A . . . . . R . T . . . . . T . T . L . . . . . L . . . . . R . . R .  
5b42930250f5f91012e71d73 S . . . . . T . A . . . . . T . T . L . . . . . L . . . . . R . . R .  
5b42931550f5f91012e74c84 S . . . . . T . A . . . . . T . T . L . . . . . L . . . . . R . . R .  
5b42931550f5f91012e749dd S . . . . . T . A . . . . . T . T . L . . . . . N . . . . . L . . . . . R . . R .  
5b4292ee50f5f91012e6fef8 S . . . . . T . A . . . . . T . T . L . . . . . L . . . . . V . . . . . R . . R .  
5b4292ee50f5f91012e6ff9a S . . . . . PT . A . . . . . T . T . L . . . . . L . . . . . R . . R .  
5b42930250f5f91012e72063 S . . . . . T . A . . . . . T . T . L . . . . . L . . . . . R . . R .  
5b4292ee50f5f91012e6ff56 S . . . . . T . A . . . . . T . T . L . . . . . G . . . . . R . . R .  
5b42930250f5f91012e7209a S . . . . . T . A . . . . . T . T . L . . . . . L . . . . . R . . R .  
5b42930250f5f91012e71f48 S . . . . . T . A . . . . . T . T . L . . . . . L . . . . . T . . . . . R . . R .  
5b42931550f5f91012e74d97 S . . . . . T . A . . . . . T . T . L . . . . . L . . . . . R . . R .  
5b42931550f5f91012e74a53 S . . . . . T . A . . . . . T . T . L . . . . . L . . . . . T . . . . . R . . R .  
5b4292ee50f5f91012e701a5 S . . . . . T . A . . . . . T . T . L . . . . . L . . . . . R . . R .  
5b42930250f5f91012e71fea S . . . . . T . A . . . . . T . Y . . . . . T . T . L . . . . . L . . . . . R . . R .  
5b42931550f5f91012e74ec4 T . LE . . . . . D . R . N . . . . . . . . . . DG . . . . . R . . R .  
5b4292ee50f5f91012e6ff64 S . . . . . T . A . . . . . T . T . L . . . . . Y . . . . . L . . . . . R . . R .  
5b4292ee50f5f91012e7003a V . . . . . T . . . . . E . S . . . . . K . N . . . . . T . T . L . . . . . L . . . . . R . . R .  
5b42931550f5f91012e74bc5 S . . . . . T . A . . . . . T . T . L . . . . . L . C . . . . . R . . R .  
5b42930250f5f91012e72305 S . . . . . S . A . . . . . T . T . L . . . . . L . . . . . R . . R .  
5b42930250f5f91012e7204c S . . . . . T . A . . . . . T . T . L . . . . . L . . . . . K . . . . . R . . R .  
5b42930250f5f91012e71b9f S . . . . . T . A . . . . . T . T . L . . . . . L . F . . . . . R . . R .  
5b42930250f5f91012e71cb3 N . S . . . . . T . A . . . . . T . T . L . . . . . L . . . . . R . . R .  
5b42931550f5f91012e75097 S . . . . . T . A . . . . . T . T . L . . . . . L . . . . . R . . R .  
5b4292ee50f5f91012e70243 S . . . . . T . A . . . . . T . T . L . . . . . TH . . . . . L . . . . . R . . R .  
5b42930250f5f91012e71a55 S . . . . . T . A . . . . . I . . . . . PT . . . . . T . T . L . . . . . L . . . . . R . . R .  
5b42930250f5f91012e71b3a S . . . . . T . A . . . . . T . T . L . . . . . L . . . . . R . . R .  
5b42931550f5f91012e74c56 T . . . . . AD . . . . . GL . . . . . H . A . . . . . L . . . . . L . . . . . R . . R .  
5b4292ee50f5f91012e6fbbe S . . . . . T . A . . . . . T . T . L . . . . . L . . . . . R . . R .  
5b4292ee50f5f91012e70351 S . . . . . T . A . . . . . T . T . L . . . . . L . . . . . R . . R .  
5b4292ee50f5f91012e6fc6f S . . . . . T . A . . . . . T . T . L . . . . . V . . . . . R . . R .  
5b4292ee50f5f91012e6fd7e S . . . . . T . A . . . . . T . T . L . . . . . L . . . . . R . . R .  
5b4292ee50f5f91012e6fdfc S . . . . . T . A . . . . . T . T . L . . . . . L . . . . . R . . R .  
5b42930250f5f91012e71b76 E . . . . . D . Y . G . . . . . L . . . . . I . . . . . R . . R .  
5b42930250f5f91012e71c24 S . . . . . T . A . . . . . T . T . L . . . . . L . . . . . E . . . . . R . . R .  
5b42930250f5f91012e71b09 RS . . . . . T . A . . . . . T . T . L . . . . . L . . . . . R . . R .  
5b42930250f5f91012e71ece S . . . . . T . A . . . . . T . T . L . . . . . L . . . . . R . . R .  
5b42931550f5f91012e74994 S . . . . . T . A . . . . . T . T . L . . . . . G . . . . . R . . R .  
5b42931550f5f91012e74a18 S . . . . . T . A . . . . . T . T . L . . . . . L . . . . . S . . . . . R . . R .  
5b42930250f5f91012e71bd7 S . . . . . T . A . . . . . T . T . L . . . . . L . . . . . N . . . . . R . . R .  
5b42930250f5f91012e71e89 SP . . . . . TLA . . . . . T . T . L . . . . . L . . . . . R . . R .  
5b42930250f5f91012e71c49 S . . . . . T . A . . . . . T . T . L . . . . . L . . . . . S . . . . . R . . R .  
5b4292ee50f5f91012e6fdcf S . . . . . T . A . . . . . T . T . L . . . . . R . . . . . R . . R .  
5b42930250f5f91012e71c5a S . . . . . T . A . . . . . T . T . L . . . . . T . . . . . L . . . . . R . . R .  
5b42930250f5f91012e7203b PH . S . . . . . T . A . . . . . T . T . L . . . . . L . . . . . R . . R .  
5b42930250f5f91012e7202a S . . . . . R . . . . . T . A . . . . . T . T . L . . . . . L . . . . . R . . R .  
5b42930250f5f91012e71e70 S . . . . . T . A . . . . . T . T . L . . . . . F . . . . . R . . R .  
5b4292ee50f5f91012e6fff0 S . . . . . T . A . . . . . T . T . L . . . . . W . Y . . . . . R . . R .  
5b42930250f5f91012e71cc3 S . . . . . TLA . . . . . T . T . L . . . . . L . . . . . R . . R .  
5b42931550f5f91012e74ad9 S . . . . . V . . . . . T . A . . . . . T . T . L . . . . . L . . . . . R . . R .  
5b42930250f5f91012e72033 S . . . . . T . A . . . . . T . T . L . . . . . L . . . . . R . . R .  
5b42930250f5f91012e71eb6 S . . . . . T . A . . . . . T . T . L . . . . . L . . . . . R . . R .  
5b4292ee50f5f91012e70126 S . . . . . T . A . . . . . T . T . L . . . . . L . . . . . R . . R .  
5b4292ee50f5f91012e701c1 S . . . . . T . A . . . . . T . T . L . . . . . L . . . . . R . . R .  
5b42930250f5f91012e71a43 S . . . . . T . A . . . . . T . T . L . . . . . LA . . . . . S . . . . . R . . R .  
5b42930250f5f91012e71a6f S . . . . . T . A . . . . . T . T . L . . . . . GL . . . . . R . . R .  
5b42931550f5f91012e74fd7 S . . . . . T . A . . . . . T . T . L . . . . . L . . . . . R . . R .  
5b42930250f5f91012e71ee0 S . . . . . T . A . . . . . T . T . L . . . . . GL . . . . . R . . R .  
5b4292ee50f5f91012e701ab S . . . . . T . A . . . . . T . T . L . . . . . E . . . . . R . . R .  
5b42930250f5f91012e71ac1 P . S . . . . . T . A . . . . . T . T . L . . . . . G . L . . . . . R . . R .  
5b42930250f5f91012e7208c S . . . . . T . A . . . . . T . T . L . . . . . L . . . . . N . . . . . R . . R .  
5b42930250f5f91012e72065 S . . . . . T . A . . . . . T . T . L . . . . . N . . . . . R . . R .  
5b4292ee50f5f91012e7001d S . . . . . T . A . . . . . T . T . L . . . . . L . . . . . R . . R .  
5b42930250f5f91012e71c01 S . . . . . T . A . . . . . T . G . . . . . T . T . L . . . . . L . . . . . R . . R .  
5b42930250f5f91012e71c4b R . S . . . . . T . A . . . . . T . T . L . . . . . L . . . . . R . . R .  
5b42931550f5f91012e74db7 S . . . . . T . A . . . . . T . T . L . . . . . L . . . . . R . . R .  
5b42930250f5f91012e720d9 S . . . . . T . A . . . . . T . T . L . . . . . L . . . . . T . . . . . R . . R .  
5b4292ee50f5f91012e7026b S . . . . . T . A . . . . . T . T . L . . . . . L . . . . . R . . R .  
5b42930250f5f91012e71b50 S . . . . . T . A . . . . . T . T . L . . . . . L . . . . . R . . R .  
5b42931550f5f91012e74bcf P . S . . . . . P . A . . . . . T . T . L . . . . . L . . . . . R . . R .  
5b4292ee50f5f91012e70265 S . . . . . T . A . . . . . T . T . L . . . . . I . . . . . R . . R .  
5b4292ee50f5f91012e700cc H . . . . . S . . . . . T . A . . . . . T . T . L . . . . . L . . . . . R . . R .
