# Supplementary material for: Diverse patterns of antibody variable gene repertoire disruption in patients with amyloid light chain (AL) amyloidosis
Source: PubMed Central journal article supplement (PMC7340310; doi:10.1371/journal.pone.0235713), 2020-07-07
Supplement: pone.0235713.s005.pdf [file pone.0235713.s005.pdf]

|                          |     |    |     |   |     |   |    |   |      |   |    |   |     |
|--------------------------|-----|----|-----|---|-----|---|----|---|------|---|----|---|-----|
| 5b4292e450f5f91012e6de18 |     | D  | TK  |   | HR  | T | S  |   | A    |   | H  |   | EVI |
| 5b4292e550f5f91012e6e389 |     | D  | TK  |   | HR  | T | S  |   | A    |   | H  |   | EVI |
| 5b4292e450f5f91012e6e0ba | P   | D  | TK  |   | HR  | T | S  |   | A    |   | H  |   | EVI |
| 5b4292e650f5f91012e6e6dc |     | D  | TK  |   | HR  | T | S  |   | A    | T | H  |   | EVI |
| 5b4292e650f5f91012e6ed37 | P   | D  | TK  |   | HR  | T | S  |   | A    |   | H  |   | EVI |
| 5b4292e650f5f91012e6e48a |     | D  | TK  |   | HR  | T | S  |   | A    |   | H  |   | EVI |
| 5b4292e650f5f91012e6e559 |     | D  | TK  |   | HR  | T | SA |   | A    |   | H  |   | EVI |
| 5b4292e450f5f91012e6df6  |     | D  | TK  |   | HR  | T | S  |   | A    |   | H  |   | EVI |
| 5b4292e650f5f91012e6e866 |     | D  | TK  |   | HR  | T | S  |   | A    |   | H  |   | EVI |
| 5b4292e650f5f91012e6e82d |     | D  | TK  |   | HR  | T | S  |   | A    | A | H  |   | EVI |
| 5b4292e450f5f91012e6df77 | P   | D  | TK  |   | HR  | T | S  |   | A    |   | H  |   | EVI |
| 5b4292e650f5f91012e6e8f3 |     | D  | TK  | R | HR  | T | S  |   | A    |   | H  |   | EVI |
| 5b4292e550f5f91012e6e313 |     | D  | TK  |   | HR  | T | S  |   | EIPA |   | H  |   | EVI |
| 5b4292e650f5f91012e6e7af |     | D  | TK  |   | LHR | T | S  |   | A    |   | H  |   | EVI |
| 5b4292e650f5f91012e6e854 |     | D  | TK  |   | HR  | T | S  |   | A    |   | H  |   | EVI |
| 5b4292e450f5f91012e6e02a | N   | D  | TK  |   | HR  | T | S  |   | A    |   | H  |   | EVI |
| 5b4292e650f5f91012e6ea45 |     | D  | TK  |   | HR  | T | S  | R | A    |   | H  |   | EVI |
| 5b4292e550f5f91012e6e33e | S   | D  | TK  |   | HR  | T | S  |   | A    |   | H  |   | EVI |
| 5b4292e650f5f91012e6e6a6 |     | D  | TK  |   | HR  | T | S  |   | A    |   | H  |   | EVI |
| 5b4292e650f5f91012e6e618 |     | D  | TK  |   | HR  | T | S  |   | A    |   | H  |   | EVI |
| 5b4292e450f5f91012e6e0a8 |     | D  | TK  |   | HR  | T | S  |   | A    | V | H  |   | EVI |
| 5b4292e650f5f91012e6e3bb | PR  | D  | TK  |   | HR  | T | S  |   | A    |   | H  |   | EVI |
| 5b4292e650f5f91012e6e4b6 | L   | D  | TK  |   | HR  | T | S  | G | A    |   | H  |   | EVI |
| 5b4292e550f5f91012e6e375 |     | D  | TK  |   | HR  | T | S  |   | A    |   | H  |   | EVI |
| 5b4292e650f5f91012e6e00  |     | D  | TK  |   | HR  | T | S  |   | A    |   | H  |   | EVI |
| 5b4292e650f5f91012e6e625 | L P | D  | TK  |   | HR  | T | S  |   | A    |   | H  |   | EVI |
| 5b4292e650f5f91012e6e60f |     | D  | TK  |   | HR  | T | SD |   | A    |   | H  |   | EVI |
| 5b4292e650f5f91012e6e92b |     | D  | TK  | R | HR  | T | S  |   | A    |   | H  |   | EVI |
| 5b4292e650f5f91012e6e82b |     | D  | TK  |   | HR  | T | S  |   | A    |   | H  |   | EVI |
| 5b4292e550f5f91012e6e38d |     | D  | TK  | G | HR  | T | S  |   | A    |   | H  |   | EVI |
| 5b4292e450f5f91012e6ddf2 |     | D  | TK  |   | HR  | T | Y  |   | A    |   | H  |   | EVI |
| 5b4292e650f5f91012e6e63b |     | D  | TK  | G | HR  | T | S  |   | A    |   | H  |   | EVI |
| 5b4292e650f5f91012e6e816 |     | D  | TK  |   | HR  | T | S  |   | AP   |   | H  |   | EVI |
| 5b4292e650f5f91012e6e437 |     | D  | TK  |   | HR  | T | SS |   | A    |   | H  |   | EVI |
| 5b4292e450f5f91012e6dfE1 |     | D  | TK  | S | HR  | T | S  |   | A    |   | H  |   | EVI |
| 5b4292e650f5f91012e6e5ed |     | D  | TK  |   | HR  | T | S  |   | A    |   | H  |   | EVI |
| 5b4292e450f5f91012e6e09c |     | D  | TK  |   | HR  | A | S  |   | A    |   | H  |   | EVI |
| 5b4292e650f5f91012e6e746 |     | D  | TK  |   | HR  | T | S  |   | A    |   | H  |   | EVI |
| 5b4292e550f5f91012e6e2e0 | P P | D  | TK  |   | HR  | T | S  |   | A    |   | H  |   | EVI |
| 5b4292e650f5f91012e6e95c |     | D  | TK  |   | HR  | T | S  |   | A    |   | H  |   | EVI |
| 5b4292e650f5f91012e6e3e7 |     | D  | TK  |   | HR  | T | S  |   | A    |   | H  |   | EVI |
| 5b4292e450f5f91012e6de46 | LP  | D  | TK  |   | HR  | T | S  |   | A    |   | H  |   | EVI |
| 5b4292e550f5f91012e6e379 |     | D  | TK  |   | HR  | T | S  |   | AA   |   | H  |   | EVI |
| 5b4292e650f5f91012e6e82c | H   | D  | TK  |   | HR  | T | S  |   | A    |   | H  |   | EVI |
| 5b4292e650f5f91012e6e827 |     | D  | TK  |   | HR  | T | S  |   | A    |   | H  |   | EVI |
| 5b4292e650f5f91012e6e8db |     | D  | TK  |   | HR  | T | S  |   | A    |   | H  |   | EVI |
| 5b4292e650f5f91012e6e41d |     | D  | TK  |   | HR  | T | S  |   | A    |   | H  |   | EVI |
| 5b4292e650f5f91012e6e787 |     | D  | TK  |   | HR  | T | S  |   | A    |   | H  |   | EVI |
| 5b4292e450f5f91012e6e0c1 |     | D  | TK  |   | HR  | T | S  |   | A    |   | H  |   | EVI |
| 5b4292e650f5f91012e6e8f9 |     | D  | TK  |   | HR  | T | S  |   | A    |   | H  |   | EVI |
| 5b4292e650f5f91012e6e715 | I   | D  | TK  |   | HR  | T | S  |   | A    | E | H  |   | EVI |
| 5b4292e650f5f91012e6ebd7 |     | D  | TK  |   | HR  | T | S  |   | A    |   | H  |   | EVI |
| 5b4292e650f5f91012e6e46f |     | TK |     |   | HR  | T | S  |   | A    |   | H  |   | EVI |
| 5b4292e450f5f91012e6e050 |     | D  | TK  |   | HR  | T | S  |   | A    | I | H  |   | EVI |
| 5b4292e650f5f91012e6e3da |     | D  | TK  |   | HR  | T | S  |   | A    |   | H  |   | EVI |
| 5b4292e450f5f91012e6dde  |     | D  | TK  |   | HR  | T | S  |   | A    |   | T  | H | EVI |
| 5b4292e650f5f91012e6e4f2 | DF  | TK |     |   | HR  | T | S  |   | A    |   | H  |   | EVI |
| 5b4292e650f5f91012e6e85e |     | TK |     |   | HR  | T | S  |   | A    |   | H  |   | EVI |
| 5b4292e650f5f91012e6e5fa |     | D  | TK  |   | HR  | T | S  |   | V    | A | H  |   | EVI |
| 5b4292e650f5f91012e6e567 |     | D  | TK  |   | HR  | T | S  |   | A    |   | HH |   | EVI |
| 5b4292e650f5f91012e6e5f5 |     | D  | TK  |   | HR  | T | S  |   | KA   |   | H  |   | EVI |
| 5b4292e650f5f91012e6e528 |     | D  | SK  |   | HR  | T | S  |   | A    |   | H  |   | EVI |
| 5b4292e650f5f91012e6e849 |     | D  | TK  |   | HR  | T | S  |   | A    |   | H  |   | EVI |
| 5b4292e450f5f91012e6df03 |     | D  | TK  |   | HR  | T | S  |   | A    |   | H  |   | EVI |
| 5b4292e650f5f91012e6e766 |     | D  | TK  |   | HR  | T | S  |   | A    |   | H  |   | EVI |
| 5b4292e650f5f91012e6ea64 | T   | ED | TK  |   | HR  | T | S  |   | A    |   | H  |   | EVI |
| 5b4292e650f5f91012e6e812 |     | D  | TK  |   | HR  | T | S  | S | A    |   | H  |   | EVI |
| 5b4292e650f5f91012e6e91d | AD  | TK |     |   | HR  | T | S  |   | A    | L | H  |   | EVI |
| 5b4292e450f5f91012e6de9b | DS  | TK |     |   | HR  | T | S  |   | A    |   | H  |   | EVI |
| 5b4292e650f5f91012e6ea98 |     | D  | TK  |   | HR  | T | S  | V | A    |   | H  |   | EVI |
| 5b4292e650f5f91012e6ec5e |     | D  | TK  | K | HR  | T | S  |   | A    |   | H  |   | EVI |
| 5b4292e450f5f91012e6df1c |     | D  | TK  |   | HR  | T | S  |   | A    |   | H  |   | EVI |
| 5b4292e450f5f91012e6ded5 |     | D  | TK  | P | HR  | T | S  |   | A    |   | H  |   | EVI |
| 5b4292e650f5f91012e6e7e2 | GD  | TK |     |   | HR  | T | S  |   | A    |   | H  |   | EVI |
| 5b4292e650f5f91012e6eb6b |     | D  | TK  |   | THR | T | M  | S | A    |   | H  |   | EVI |
| 5b4292e450f5f91012e6df11 |     | D  | TK  |   | HR  | T | S  |   | A    |   | H  |   | EVI |
| 5b4292e650f5f91012e6e781 |     | D  | TK  |   | HR  | T | S  |   | A    |   | H  |   | EVI |
| 5b4292e650f5f91012e6e604 |     | D  | TK  |   | HR  | T | S  |   | A    |   | H  |   | EVI |
| 5b4292e650f5f91012e6eb92 | A   | D  | TK  |   | HR  | T | S  |   | A    |   | H  |   | EVI |
| 5b4292e650f5f91012e6ea05 |     | D  | TK  |   | HR  | T | S  |   | A    |   | H  |   | EVI |
| 5b4292e650f5f91012e6e3a2 | P   | D  | TK  |   | HR  | T | S  |   | A    |   | H  |   | EVI |
| 5b4292e650f5f91012e6ed17 |     | D  | TK  |   | HR  | T | S  | R | A    |   | H  |   | EVI |
| 5b4292e650f5f91012e6e3f4 |     | D  | TK  |   | HR  | T | S  |   | A    |   | H  |   | EVI |
| 5b4292e650f5f91012e6e7d2 |     | D  | TK  |   | HR  | T | S  |   | A    |   | H  |   | EVI |
| 5b4292e450f5f91012e6df7c |     | D  | TK  |   | HR  | T | S  |   | A    |   | H  | V | EVI |
| 5b4292e650f5f91012e6e929 |     | D  | TK  |   | HR  | T | S  |   | AS   |   | H  |   | EVI |
| 5b4292e650f5f91012e6ebc9 |     | D  | TK  |   | HR  | T | S  |   | A    |   | H  | I | EVI |
| 5b4292e650f5f91012e6ed18 |     | D  | TK  |   | HR  | T | S  |   | A    |   | H  |   | EVI |
| 5b4292e650f5f91012e6e869 | P   | D  | TK  |   | HR  | T | S  |   | A    |   | H  |   | EVI |
| 5b4292e650f5f91012e6e5c4 |     | D  | TK  |   | HR  | T | S  |   | A    |   | H  |   | EVI |
| 5b4292e650f5f91012e6e585 |     | D  | TK  |   | HR  | T | S  |   | A    |   | H  | A | EVI |
| 5b4292e650f5f91012e6e56f |     | D  | TK  |   | HR  | T | S  | L | A    |   | H  |   | EVI |
| 5b4292e650f5f91012e6ebd9 | S   | D  | TK  |   | HR  | T | S  |   | A    |   | H  |   | EVI |
| 5b4292e450f5f91012e6e09b |     | D  | TK  |   | HR  | T | S  |   | A    |   | H  |   | EVI |
| 5b4292e650f5f91012e6ead7 |     | D  | TK  |   | HR  | T | S  |   | A    |   | H  |   | EVI |
| 5b4292e650f5f91012e6e44d |     | D  | TK  |   | HR  | T | S  |   | A    |   | H  | I | EVI |
| 5b4292e650f5f91012e6e8ec |     | TK |     |   | HR  | T | S  |   | A    |   | H  |   | EVI |
| 5b4292e450f5f91012e6dde3 |     | D  | TK  |   | HR  | T | S  |   | A    | K | H  |   | EVI |
| 5b4292e650f5f91012e6eada | P   | D  | TK  | T | HR  | T | S  |   | A    |   | H  |   | EVI |
| 5b4292e450f5f91012e6df18 |     | D  | TK  |   | HR  | T | S  |   | A    |   | H  |   | EVI |
| 5b4292e650f5f91012e6ec66 |     | D  | TK  |   | HR  | T | S  |   | A    |   | H  |   | EVI |
| 5b4292e650f5f91012e6e757 |     | D  | TKD |   | HR  | T | S  |   | A    |   | H  |   | EVI |
| 5b4292e650f5f91012e6e42a |     | D  | TK  | K | HR  | T | S  |   | A    |   | H  |   | EVI |
| 5b4292e550f5f91012e6e33f |     | D  | TK  |   | HR  | T | S  |   | A    |   | H  |   | EVI |
| 5b4292e650f5f91012e6e45d |     | D  | TK  |   | HR  | T | S  |   | A    |   | H  |   | EVI |
| 5b4292e450f5f91012e6e0f9 | P   | ND | TK  | G | HR  | T | S  |   | A    |   | H  |   | EVI |

5b4292e650f5f91012e6e8d7 .D. TK. HR. T. S. A. H. EVI  
5b4292e650f5f91012e6e7d5 P. D. TK. HR. T. A. S. A. H. EVI  
5b4292e650f5f91012e6e30e .D. TK. HR. T. S. A. H. EVI  
5b4292e650f5f91012e6e3bd F. D. TK. HR. T. S. A. H. EVI  
5b4292e650f5f91012e6e511 .D. TK. HR. T. S. L. A. H. EVI  
5b4292e650f5f91012e6e8d4 .D. TK. HR. T. S. A. P. H. EVI  
5b4292e650f5f91012e6e5bd .D. TK. HR. T. S. A. H. EVI  
5b4292e450f5f91012e6e0ae .D. TK. HR. T. S. A. H. EVI  
5b4292e650f5f91012e6e92c .D. TK. HR. T. S. A. H. EVI  
5b4292e650f5f91012e6e796 .D. TK. HR. T. R. S. A. H. EVI  
5b4292e650f5f91012e6e466 .D. TK. HR. T. S. A. H. EVI  
5b4292e450f5f91012e6e0a5 .D. TK. HR. T. S. P. A. H. EVI  
5b4292e650f5f91012e6e8e1 P. D. TK. HR. T. S. A. H. EVI  
5b4292e550f5f91012e6e36a N. D. TK. HR. T. S. A. H. EVI  
5b4292e450f5f91012e6df98 .D. TK. HR. T. S. W. A. H. EVI  
5b4292e650f5f91012e6e5ee .D. TK. V. HR. T. S. A. H. EVI  
5b4292e550f5f91012e6e307 .D. TK. HR. T. S. A. H. EVI  
5b4292e450f5f91012e6dde9 .D. TN. HR. T. S. A. H. EVI  
5b4292e650f5f91012e6e5cb L. P. D. TK. HR. T. S. A. H. EVI  
5b4292e450f5f91012e6e0c4 .D. QTK. HR. T. S. A. H. EVI  
5b4292e650f5f91012e6e536 S. D. TK. HR. T. S. A. H. EVI  
5b4292e650f5f91012e6e639 .D. TK. HR. T. S. A. H. EVI  
5b4292e650f5f91012e6ebb7 .D. TK. HR. T. S. A. H. EVI  
5b4292e650f5f91012e6e459 .D. TK. HR. T. S. A. H. EVI  
5b4292e650f5f91012e6e54b .D. TK. HR. T. S. C. A. H. EVI  
5b4292e450f5f91012e6de60 .D. TK. HR. T. S. A. H. EVI  
5b4292e650f5f91012e6ece8 .D. TK. HR. T. S. A. H. EVI  
5b4292e650f5f91012e6e647 P. D. TK. HR. T. S. A. H. EVI  
5b4292e650f5f91012e6e76a .D. TK. R. T. S. A. H. EVI  
5b4292e650f5f91012e6e3d3 A. D. TK. HR. T. S. A. H. EVI  
5b4292e450f5f91012e6de9e .D. TK. P. HR. T. S. A. H. EVI  
5b4292e650f5f91012e6e8cd .D. TK. HR. T. S. A. H. EVI  
5b4292e550f5f91012e6e2ed T. D. TK. HR. T. S. A. H. EVI  
5b4292e550f5f91012e6ef0 .D. TK. L. HR. T. S. A. H. EVI  
5b4292e650f5f91012e6e45e .D. TK. HR. T. S. G. A. H. EVI  
5b4292e450f5f91012e6df81 P. D. TK. S. S. HR. T. S. A. H. EVI  
5b4292e650f5f91012e6e4e0 .D. TK. S. HR. T. S. A. H. EVI  
5b4292e650f5f91012e6e5e1 .D. TK. HR. T. S. L. A. H. EVI  
5b4292e450f5f91012e6de17 DS. TK. HR. T. S. A. H. EVI  
5b4292e450f5f91012e6e024 .D. TK. HR. T. S. A. H. EVI  
5b4292e450f5f91012e6e054 .D. TK. HR. T. S. A. H. EVI  
5b4292e650f5f91012e6e3df .D. TK. HR. T. S. A. H. EVI  
5b4292e650f5f91012e6e630 .D. TK. HR. T. S. A. H. EVI R.  
5b4292e450f5f91012e6e02d .D. TK. W. HR. T. S. A. H. EVI  
5b4292e650f5f91012e6e7a2 G. TK. HR. T. S. A. H. EVI  
5b4292e650f5f91012e6e77a T. D. TK. HR. T. S. A. H. EVI  
5b4292e650f5f91012e6e7a4 .D. TK. S. HR. T. S. A. H. EVI  
5b4292e450f5f91012e6e083 .D. TK. HR. T. S. A. F. H. EVI  
5b4292e650f5f91012e6eb63 P. D. TK. HR. T. S. A. H. EVI  
5b4292e450f5f91012e6dfb6 .D. TK. HR. T. S. E. A. H. EVI  
5b4292e650f5f91012e6e489 .D. TK. HR. T. S. IA. H. EVI  
5b4292e650f5f91012e6e961 P. D. TK. HR. T. S. A. H. EVI  
5b4292e550f5f91012e6e2e1 .D. TK. HR. T. S. A. H. EVI  
5b4292e650f5f91012e6e7de .D. TK. HR. T. S. A. H. EVI  
5b4292e650f5f91012e6e3ef .D. TK. HR. T. S. A. H. EVI  
5b4292e650f5f91012e6eb0c .D. TK. HR. T. S. Y. A. H. EVI  
5b4292e450f5f91012e6de69 H. TK. HR. T. S. A. H. EVI  
5b4292e650f5f91012e6ec2a .D. TK. HR. T. S. A. H. EVI  
5b4292e650f5f91012e6e8ad .D. TK. HR. T. S. A. H. EVI  
5b4292e650f5f91012e6e6a5 .D. TK. HR. T. S. A. H. EVI  
5b4292e550f5f91012e6e314 H. D. TK. HR. T. S. A. H. EVI  
5b4292e650f5f91012e6e8d3 .D. TK. HR. T. S. A. H. EVI  
5b4292e650f5f91012e6e6bc .D. TK. HR. T. S. V. H. EVI  
5b4292e450f5f91012e6df50 .D. TK. HR. T. S. A. H. EVI  
5b4292e450f5f91012e6dffdf .D. TK. Q. HR. T. S. A. H. EVI  
5b4292e450f5f91012e6dff8 .D. TK. H. HR. T. S. A. E. H. EVI  
5b4292e450f5f91012e6de68 A. D. TK. HR. T. S. A. H. EVI  
5b4292e650f5f91012e6e761 .D. TK. HR. T. S. A. H. EVI  
5b4292e450f5f91012e6e10e .D. TK. HR. T. S. A. H. EVI  
5b4292e650f5f91012e6ec1d .D. TK. C. HR. T. S. A. H. EVI  
5b4292e650f5f91012e6e4ed .D. TK. HR. T. S. A. H. EVI  
5b4292e650f5f91012e6e422 N. TK. HR. T. S. A. H. EVI  
5b4292e450f5f91012e6dfd0 .D. TK. V. HR. T. S. A. H. EVI  
5b4292e650f5f91012e6e48d G. D. TK. HR. T. S. A. H. EVI  
5b4292e650f5f91012e6e942 .D. TK. HR. T. S. A. H. EVI  
5b4292e450f5f91012e6e0bc .D. TK. HR. T. S. S. H. EVI  
5b4292e650f5f91012e6eb5b .D. TK. HR. T. S. A. H. EVI  
5b4292e650f5f91012e6e88c .D. TK. HR. T. S. A. H. EVI  
5b4292e650f5f91012e6ecd6 .D. TK. HR. T. S. D. H. EVI  
5b4292e450f5f91012e6e046 .D. TK. HR. T. S. A. S. H. EVI  
5b4292e650f5f91012e6e9b0 .D. TK. HR. T. S. A. H. EVI  
5b4292e650f5f91012e6e7c4 .D. TK. HR. T. F. A. H. EVI  
5b4292e650f5f91012e6e7c0 .D. TE. HR. T. S. A. H. EVI  
5b4292e650f5f91012e6e501 .D. TK. HR. T. S. V. H. EVI  
5b4292e550f5f91012e6e321 .D. TK. HR. T. S. A. H. EVI R.  
5b4292e650f5f91012e6ec32 L. D. TK. HR. T. S. A. H. EVI  
5b4292e450f5f91012e6dfefeb .D. TK. HR. T. S. A. H. EVI  
5b4292e650f5f91012e6ea53 .D. TK. HR. T. S. A. N. H. EVI  
5b4292e650f5f91012e6e3f8 R. D. TK. HR. T. S. A. H. EVI  
5b4292e650f5f91012e6e8f6 .D. T. HR. T. S. A. H. EVI  
5b4292e650f5f91012e6ea37 .D. TK. HR. T. S. A. H. EVI  
5b4292e450f5f91012e6de13 .D. TK. HR. T. S. A. H. EVI  
5b4292e450f5f91012e6debb .D. TK. HR. T. S. A. H. EVI  
5b4292e650f5f91012e6e3d1 .D. TK. HR. T. S. A. H. EVI  
5b4292e550f5f91012e6e30c .D. TK. E. HR. T. S. A. H. EVI  
5b4292e450f5f91012e6e0bf .D. TKS. HR. T. S. A. H. EVI  
5b4292e450f5f91012e6df71 .D. TK. HR. T. S. IA. H. EVI  
5b4292e650f5f91012e6ea69 L. D. TK. HR. T. S. A. H. EVI  
5b4292e450f5f91012e6e077 .D. TK. HR. T. S. A. H. EVI  
5b4292e650f5f91012e6e804 .D. TK. F. HR. T. S. A. H. EVI  
5b4292e650f5f91012e6e7e4 .D. TK. HR. T. S. A. H. EVI  
5b4292e650f5f91012e6e80d .D. TK. HR. T. S. A. H. EVI  
5b4292e650f5f91012e6e51b .D. TK. HR. T. S. A. H. EVI  
5b4292e650f5f91012e6e62b .D. TK. HR. T. S. A. H. EVI  
5b4292e650f5f91012e6e6c2 .D. TK. HR. T. S. A. F. H. EVI  
5b4292e650f5f91012e6e603 .D. TK. HR. T. S. A. R. H. EVI

|                          |               |     |     |     |    |    |    |     |     |
|--------------------------|---------------|-----|-----|-----|----|----|----|-----|-----|
| 5b4292e650f5f91012e6e3e1 | .D.           | TK  | HR. | T   | S  | A  | H  | EVI |     |
| 5b4292e450f5f91012e6df42 | .D.           | TK  | HR. | N   | S  | A  | H  | EVI |     |
| 5b4292e650f5f91012e6e4a0 | .D.           | TK  | HR. | T   | S  | A  | H  | EVI |     |
| 5b4292e650f5f91012e6e5fb | .D.           | TK  | HR. | T   | S  | A  | A  | H   | EVI |
| 5b4292e650f5f91012e6e736 | .D.           | TK  | HR. | T   | S  | A  | A  | H   | EVI |
| 5b4292e650f5f91012e6e59f | .D.           | TK  | HR. | T   | S  | A  | CH | EVI |     |
| 5b4292e650f5f91012e6e39a | .A.           | .D. | TK  | HR. | T  | S  | A  | H   | EVI |
| 5b4292e450f5f91012e6df4d | .D.           | TK  | HR. | T   | S  | A  | H  | EVI |     |
| 5b4292e650f5f91012e6e91b | .D.           | TK  | HR. | TG  | S  | A  | H  | EVI |     |
| 5b4292e650f5f91012e6ec82 | .A.           | .D. | TK  | HR. | T  | S  | A  | H   | EVI |
| 5b4292e650f5f91012e6e877 | .D.           | TK  | HR. | T   | S  | A  | G  | H   | EVI |
| 5b4292e650f5f91012e6e4ee | .D.           | TK  | HR. | T   | S  | A  | H  | EVI |     |
| 5b4292e450f5f91012e6dff2 | .L.           | .D. | TK  | HR. | T  | S  | A  | H   | EVI |
| 5b4292e650f5f91012e6e499 | -----         | .D. | TK  | HR. | T  | S  | A  | H   | EVI |
| 5b4292e650f5f91012e6ebaf | .D.           | TK  | HR. | T   | S  | A  | H  | EVI |     |
| 5b4292e650f5f91012e6e664 | .D.           | TKC | HR. | T   | S  | A  | H  | EVI |     |
| 5b4292e650f5f91012e6e3d5 | .S.           | .D. | TK  | HR. | T  | S  | A  | H   | EVI |
| 5b4292e550f5f91012e6e2df | .D.           | TK  | HR. | T   | S  | A  | I  | H   | EVI |
| 5b4292e650f5f91012e6e86e | .D.           | TK  | HR. | T   | S  | A  | K  | H   | EVI |
| 5b4292e650f5f91012e6e3be | .D.           | TK  | HR. | T   | S  | A  | H  | EVI |     |
| 5b4292e650f5f91012e6ea9b | .D.           | TK  | HR. | T   | S  | A  | H  | EVI |     |
| 5b4292e450f5f91012e6e017 | .D.           | TK  | HR. | T   | S  | A  | E  | H   | EVI |
| 5b4292e650f5f91012e6e652 | .D.           | TK  | HR. | T   | S  | A  | H  | EVI |     |
| 5b4292e650f5f91012e6e85a | .G.           | .D. | TK  | HR. | T  | S  | A  | H   | EVI |
| 5b4292e650f5f91012e6e88d | .D.           | TK  | HR. | T   | S  | A  | H  | EVI |     |
| 5b4292e650f5f91012e6e4cd | .S.           | .D. | TK  | HR. | T  | S  | A  | H   | EVI |
| 5b4292e550f5f91012e6e32c | .LT.R.A.      | .D. | TK  | HR. | T  | S  | A  | H   | EVI |
| 5b4292e650f5f91012e6e8b1 | .P.           | .D. | TK  | HR. | T  | S  | A  | H   | EVI |
| 5b4292e450f5f91012e6dde0 | .D.           | TK  | HR. | T   | S  | A  | H  | EVI |     |
| 5b4292e650f5f91012e6e55d | .F.           | .D. | TK  | HR. | T  | S  | A  | H   | EVI |
| 5b4292e650f5f91012e6e860 | .P.P.         | .D. | TK  | HR. | T  | S  | A  | H   | EVI |
| 5b4292e650f5f91012e6e890 | .D.           | TK  | HR. | T   | S  | A  | H  | EVI |     |
| 5b4292e450f5f91012e6dfc7 | .D.           | TK  | HR. | T   | S  | A  | H  | EVI |     |
| 5b4292e650f5f91012e6e3b4 | .L.           | .V. | TK  | HR. | T  | S  | A  | H   | EVI |
| 5b4292e650f5f91012e6eba6 | .D.           | TK  | HR. | T   | S  | A  | I  | H   | EVI |
| 5b4292e450f5f91012e6e091 | -.D.          | TK  | HR. | T   | S  | A  | H  | EVI |     |
| 5b4292e450f5f91012e6df6e | .D.           | TK  | HR. | T   | S  | A  | H  | EVI |     |
| 5b4292e450f5f91012e6de22 | -----L        | .D. | TK  | HR. | T  | S  | A  | H   | EVI |
| 5b4292e450f5f91012e6ddd9 | .D.           | TK  | HR. | T   | S  | P  | A  | H   | EVI |
| 5b4292e450f5f91012e6df2d | .D.           | TK  | HS  | T   | S  | A  | H  | EVI |     |
| 5b4292e650f5f91012e6e7fc | .G.           | .D. | TK  | HR. | T  | S  | A  | H   | EVI |
| 5b4292e650f5f91012e6e3b8 | .D.           | TK  | HR. | T   | S  | A  | H  | EVI |     |
| 5b4292e450f5f91012e6df12 | .D.           | TK  | HR. | T   | E  | S  | A  | H   | EVI |
| 5b4292e450f5f91012e6df27 | .E.           | TK  | HR. | T   | S  | A  | H  | EVI |     |
| 5b4292e650f5f91012e6e5af | .P.P.         | .D. | TK  | HR. | T  | S  | A  | H   | EVI |
| 5b4292e650f5f91012e6e738 | .P.P.P.P.     | .D. | TK  | HR. | T  | S  | A  | H   | EVI |
| 5b4292e650f5f91012e6e6d2 | .D.           | TK  | HR. | T   | S  | A  | H  | EVI |     |
| 5b4292e650f5f91012e6e65d | .D.           | TK  | HR. | T   | S  | N  | A  | H   | EVI |
| 5b4292e650f5f91012e6e820 | .D.           | AK  | HR. | T   | S  | A  | H  | EVI |     |
| 5b4292e450f5f91012e6ddf5 | .P.A.S.       | .D. | TK  | HR. | T  | S  | A  | H   | EVI |
| 5b4292e650f5f91012e6e808 | .D.           | TK  | HR. | T   | S  | A  | H  | EVI |     |
| 5b4292e550f5f91012e6e360 | .D.           | TK  | HR. | T   | S  | A  | HR | EVI |     |
| 5b4292e650f5f91012e6e8c6 | .D.           | TK  | HR. | T   | S  | A  | V  | H   | EVI |
| 5b4292e650f5f91012e6e5c6 | .D.           | TK  | HR. | T   | S  | G  | A  | H   | EVI |
| 5b4292e650f5f91012e6e9b5 | -.D.          | TK  | HR. | T   | S  | A  | H  | EVI |     |
| 5b4292e650f5f91012e6e8de | .D.           | TK  | HR. | T   | S  | A  | H  | EVI |     |
| 5b4292e650f5f91012e6e6f6 | .D.           | TK  | HR. | T   | S  | A  | H  | EVI |     |
| 5b4292e450f5f91012e6df87 | .P.           | .D. | TK  | HR. | T  | S  | A  | H   | EVI |
| 5b4292e650f5f91012e6e9c0 | .A.A.         | .D. | TK  | HR. | T  | S  | A  | H   | EVI |
| 5b4292e650f5f91012e6e57c | .A.           | .D. | TK  | HR. | T  | S  | A  | H   | EVI |
| 5b4292e650f5f91012e6e602 | .D.           | TK  | HR. | T   | S  | F  | A  | H   | EVI |
| 5b4292e450f5f91012e6de14 | .D.           | TK  | HR. | T   | S  | A  | H  | EVI |     |
| 5b4292e450f5f91012e6df07 | .T.           | .D. | TK  | HR. | T  | S  | A  | H   | EVI |
| 5b4292e650f5f91012e6e402 | .D.           | TK  | HG  | T   | S  | A  | H  | EVI |     |
| 5b4292e450f5f91012e6dee9 | .D.           | TK  | HR. | T   | S  | A  | H  | EVI |     |
| 5b4292e450f5f91012e6de75 | .D.           | TK  | HR. | T   | S  | A  | H  | EVI |     |
| 5b4292e450f5f91012e6de73 | .DV.          | TK  | HR. | T   | S  | A  | H  | EVI |     |
| 5b4292e650f5f91012e6e4b8 | .L.           | .D. | TK  | HR. | T  | S  | A  | H   | EVI |
| 5b4292e450f5f91012e6e00a | .D.           | TK  | HR. | T   | S  | A  | H  | EVI |     |
| 5b4292e650f5f91012e6e92a | .D.           | TK  | HR. | T   | S  | T  | A  | H   | EVI |
| 5b4292e650f5f91012e6e3ea | ---SYELT.R.A. | .D. | TK  | HR. | T  | S  | A  | H   | EVI |
| 5b4292e450f5f91012e6e07f | -----         | .D. | TK  | HR. | T  | S  | A  | H   | EVI |
| 5b4292e650f5f91012e6e530 | .P.A.         | .D. | TK  | HR. | T  | S  | A  | H   | EVI |
| 5b4292e650f5f91012e6e7d1 | .D.           | TK  | HR. | T   | S  | A  | N  | H   | EVI |
| 5b4292e650f5f91012e6ecbc | -----LGA.     | .D. | TK  | HR. | T  | S  | A  | H   | EVI |
| 5b4292e650f5f91012e6e503 | .D.           | TK  | HR. | I   | S  | A  | H  | EVI |     |
| 5b4292e450f5f91012e6dea8 | .D.           | TK  | HR. | T   | LS | A  | H  | EVI |     |
| 5b4292e650f5f91012e6e407 | .D.           | TK  | HR. | T   | S  | Y  | A  | H   | EVI |
| 5b4292e650f5f91012e6e409 | .L.           | .D. | TK  | HR. | T  | S  | A  | H   | EVI |
| 5b4292e650f5f91012e6e7e1 | .D.           | TK  | HR. | T   | S  | A  | H  | EVI |     |
| 5b4292e450f5f91012e6e04b | -----         | .D. | TK  | HR. | T  | S  | A  | H   | EVI |
| 5b4292e650f5f91012e6e5b3 | .T-           | .D. | TK  | HR. | T  | S  | A  | H   | EVI |
| 5b4292e450f5f91012e6dfdd | .D.           | TK  | HR  | T   | S  | A  | H  | EVI |     |
| 5b4292e650f5f91012e6e699 | .V.           | .D. | TK  | HR. | T  | S  | A  | H   | EVI |
| 5b4292e650f5f91012e6e57d | .D.           | TK  | HR. | T   | S  | A  | K  | H   | EVI |
| 5b4292e450f5f91012e6df17 | -----         | .D. | TK  | HR. | T  | S  | A  | H   | EVI |
| 5b4292e650f5f91012e6e481 | .D.           | TK  | HR. | T   | S  | A  | H  | EVI |     |
| 5b4292e650f5f91012e6e6ce | .K.           | .D. | TK  | HR. | T  | S  | A  | H   | EVI |
| 5b4292e550f5f91012e6e380 | .H.           | .D. | TK  | HR. | T  | S  | A  | H   | EVI |
| 5b4292e650f5f91012e6e666 | .D.           | TK  | HR. | T   | S  | D  | A  | H   | EVI |
| 5b4292e650f5f91012e6e552 | .D.           | TK  | HR. | T   | S  | A  | H  | EVI |     |
| 5b4292e650f5f91012e6e64f | .R.           | .D. | TK  | HR. | T  | S  | A  | H   | EVI |
| 5b4292e450f5f91012e6de56 | .D.           | TK  | HR. | TA  | S  | A  | H  | EVI |     |
| 5b4292e450f5f91012e6de1c | .D.           | TKN | HR. | T   | S  | A  | H  | EVI |     |
| 5b4292e450f5f91012e6e020 | .D.           | TK  | HR. | T   | S  | A  | N  | H   | EVI |
| 5b4292e450f5f91012e6ddb  | .D.           | TK  | HR. | T   | S  | AM | A  | H   | EVI |
| 5b4292e450f5f91012e6de4c | .D.           | TK  | HR. | T   | S  | A  | V  | H   | EVI |
| 5b4292e650f5f91012e6e832 | .D.           | TI  | HR. | T   | S  | A  | H  | EVI |     |
| 5b4292e650f5f91012e6e56e | .D.           | TK  | HR. | T   | S  | A  | H  | EVI |     |
| 5b4292e650f5f91012e6e61e | .D.           | TK  | HR. | T   | S  | A  | H  | EVI |     |
| 5b4292e650f5f91012e6e3c0 | .D.           | TK  | HR. | T   | S  | A  | H  | EVI |     |
| 5b4292e650f5f91012e6ec89 | .D.           | TK  | HR. | T   | S  | A  | H  | EVI |     |
| 5b4292e450f5f91012e6df10 | .D.           | TK  | HR. | T   | S  | A  | H  | EVI |     |
| 5b4292e650f5f91012e6eb6f | .D.           | TK  | HR. | T   | S  | A  | H  | EVI |     |
| 5b4292e650f5f91012e6e87c | .A.           | .D. | TKD | HR. | T  | S  | A  | H   | EVI |
| 5b4292e650f5f91012e6e8d8 | .D.           | TK  | HR. | T   | S  | A  | H  | EVI |     |

|                          |     |     |     |      |     |    |   |     |   |   |   |   |   |     |     |     |   |     |
|--------------------------|-----|-----|-----|------|-----|----|---|-----|---|---|---|---|---|-----|-----|-----|---|-----|
| 5b4292e650f5f91012e6e5b4 | .D. | TK  |     | HR.  | T   | S  | . | A   | . | R | . | H | . | EVI |     |     |   |     |
| 5b4292e650f5f91012e6e7d7 | .D. | TK  |     | HR.  | T   | S  | . | A   | . | G | . | H | . | EVI |     |     |   |     |
| 5b4292e650f5f91012e6e483 | .D. | TK  |     | HR.  | T   | S  | . | A   | . |   | . | H | . | EVI |     |     |   |     |
| 5b4292e450f5f91012e6df60 | .D. | TK  | A   | HR.  | T   | S  | . | A   | . | G | . | H | . | EVI |     |     |   |     |
| 5b4292e650f5f91012e6eccb | .D. | TK  |     | HR.  | T   | S  | . | A   | . | K | . | H | . | EVI |     |     |   |     |
| 5b4292e650f5f91012e6e87d | .D. | TK  |     | HR.  | T   | S  | . | A   | . |   | . | H | . | EVI |     |     |   |     |
| 5b4292e450f5f91012e6e0c8 | .D. | TK  |     | HR.  | T   | S  | . | A   | . |   | . | H | . | EVI |     |     |   |     |
| 5b4292e650f5f91012e6e484 | .D. | TK  |     | HR.  | P   | S  | . | A   | . |   | . | H | . | EVI |     |     |   |     |
| 5b4292e650f5f91012e6e7a1 | .D. | TK  |     | HR.  | T   | S  | . | A   | . |   | . | H | . | EVI |     |     |   |     |
| 5b4292e550f5f91012e6e343 | .D. | TK  | H   | HR.  | T   | S  | . | A   | . |   | . | H | . | EVI |     |     |   |     |
| 5b4292e450f5f91012e6dde8 | .D. | TK  |     | HR.  | T   | S  | . | A   | . |   | . | H | . | EVI |     |     |   |     |
| 5b4292e550f5f91012e6e37e | .D. | TK  |     | HR.  | T   | S  | . | A   | . |   | . | H | . | EVI |     |     |   |     |
| 5b4292e650f5f91012e6eb42 | .D. | TK  |     | HR.  | T   | S  | . | AA  | . |   | . | H | . | EVI |     |     |   |     |
| 5b4292e650f5f91012e6e8bd | .D. | TK  |     | HR.  | T   | S  | . | A   | . |   | . | H | . | EVI |     |     |   |     |
| 5b4292e650f5f91012e6e6f3 | .D. | TK  |     | HR.  | T   | S  | . | A   | . |   | . | H | . | EVI |     |     |   |     |
| 5b4292e650f5f91012e6e60c | S   | .D. | TK  |      | HR. | T  | S | .   | A | . |   | H | . | EVI |     |     |   |     |
| 5b4292e650f5f91012e6e6d3 | S   | .D. | TK  |      | HR. | T  | S | .   | A | . |   | H | . | EVI |     |     |   |     |
| 5b4292e450f5f91012e6df45 | P   | .D. | TK  |      | HR. | T  | S | .   | A | . |   | H | . | EVI |     |     |   |     |
| 5b4292e650f5f91012e6e867 |     | .D. | TKH |      | HR. | T  | S | .   | A | . |   | H | . | EVI |     |     |   |     |
| 5b4292e650f5f91012e6e900 |     |     |     | HR.  | T   | S  | . | A   | . |   | . | H | . | EVI |     |     |   |     |
| 5b4292e650f5f91012e6ebfe | .D. | TK  |     | THR. | T   | S  | . | A   | . |   | . | H | . | EVI |     |     |   |     |
| 5b4292e650f5f91012e6e690 | .D. | TK  | M   | HR.  | T   | S  | . | A   | . |   | . | H | . | EVI |     |     |   |     |
| 5b4292e650f5f91012e6e497 | R   | .D. | TK  |      | HR. | T  | S | .   | A | . |   | H | . | EVI |     |     |   |     |
| 5b4292e450f5f91012e6e061 |     | .D. | TK  |      | HR. | T  | S | .   | A | . |   | H | . | EVI |     |     |   |     |
| 5b4292e650f5f91012e6e989 | S   | .D. | TK  |      | HR. | T  | S | .   | A | . |   | H | . | EVI |     |     |   |     |
| 5b4292e650f5f91012e6ec95 |     | .D. | TK  |      | HR. | T  | Y | .   | A | . |   | H | . | EVI |     |     |   |     |
| 5b4292e650f5f91012e6ece9 |     |     |     | S    | .   | A  | . | A   | . |   | . | H | . | EVI |     |     |   |     |
| 5b4292e550f5f91012e6e376 |     | .D. | TK  |      | HR. | T  | S | .   | P | . | A | . | H | .   | EVI |     |   |     |
| 5b4292e650f5f91012e6ebdd | P   | .D. | TK  |      | HR. | TA | S | .   | A | . |   | H | . | EVI |     |     |   |     |
| 5b4292e650f5f91012e6eb20 |     | .D. | TK  |      | HR. | T  | S | .   | L | . | A | . | H | .   | EVI |     |   |     |
| 5b4292e650f5f91012e6ec56 |     | .D. | TK  | WYQ  | -   |    |   | S   | . | A | . |   | H | .   | EVI |     |   |     |
| 5b4292e650f5f91012e6e5e2 |     | .D. | TK  |      | HR. | T  | S | .   | A | . |   | H | . | EVI |     |     |   |     |
| 5b4292e450f5f91012e6df4c |     | .E. | TK  |      | HR. | T  | S | .   | A | . |   | H | . | EVI |     |     |   |     |
| 5b4292e650f5f91012e6e440 | A   | .D. | TK  |      | HR. | T  | S | .   | A | . |   | H | . | EVI |     |     |   |     |
| 5b4292e450f5f91012e6df7e |     | .D. | TK  |      | HR. | T  | S | .   | A | . |   | H | . | EVI |     |     |   |     |
| 5b4292e450f5f91012e6e05a |     | .D. | TK  |      | HR. | T  | S | .   | A | . |   | H | . | EVI |     |     |   |     |
| 5b4292e650f5f91012e6e903 |     | .D. | TK  |      | HR. | T  | S | .   | A | . |   | H | . | EVI |     |     |   |     |
| 5b4292e650f5f91012e6e788 |     |     |     | S    | .   | A  | . | A   | . |   | . | H | . | EVI |     |     |   |     |
| 5b4292e650f5f91012e6ea8b |     | .D. | TK  |      | HR. | T  | S | .   | A | . |   | H | . | EVI |     |     |   |     |
| 5b4292e450f5f91012e6de85 |     | .D. | TK  |      | HR. | T  | S | .   | R | . | A | . | H | .   | EVI |     |   |     |
| 5b4292e650f5f91012e6e96e | P   | .D. | TK  |      | HR. | T  | S | .   | A | . |   | H | . | EVI |     |     |   |     |
| 5b4292e650f5f91012e6e564 |     | .D. | TK  |      | HR. | T  | L | S   | . | A | . |   | H | .   | EVI |     |   |     |
| 5b4292e650f5f91012e6eb69 |     | .D. | TK  |      | HR. | T  | S | .   | A | . |   | H | . | EVI |     |     |   |     |
| 5b4292e650f5f91012e6e57f |     | .D. | TK  |      | HR. | T  | S | .   | V | . | A | . | H | .   | EVI |     |   |     |
| 5b4292e450f5f91012e6df40 |     | .D. | TK  | R    |     |    |   | S   | . | A | . |   | H | .   | EVI |     |   |     |
| 5b4292e650f5f91012e6e789 |     | .D. | TK  |      | HR. | T  | S | .   | A | . |   | H | . | EVI |     |     |   |     |
| 5b4292e650f5f91012e6e97b |     | .D. | TK  |      | HR. | T  | S | .   | A | . |   | H | . | EVI |     |     |   |     |
| 5b4292e650f5f91012e6e5cf | V   | .D. | TK  |      | HR. | T  | S | .   | A | . |   | H | . | EVI |     |     |   |     |
| 5b4292e650f5f91012e6e430 |     | .D. | TK  |      | HR. | T  | S | .   | A | . |   | H | . | EVI |     |     |   |     |
| 5b4292e650f5f91012e6e471 | L   | .D. | TK  |      | HR. | T  | S | .   | A | . |   | H | . | EVI |     |     |   |     |
| 5b4292e650f5f91012e6e968 |     |     |     | ENK  | GL  | S  | . | A   | . |   | . | H | . | EVI |     |     |   |     |
| 5b4292e550f5f91012e6e2e8 |     | .D. | TK  | C    |     |    |   | HR. | T | S | . | A | . | H   | .   | EVI |   |     |
| 5b4292e650f5f91012e6e79c |     | .D. | TK  |      | HR. | T  | S | .   | A | . |   | H | . | EVI |     |     |   |     |
| 5b4292e650f5f91012e6e5b7 |     | .D. | TK  |      | HR. | T  | S | .   | A | . |   | H | . | EVI |     |     |   |     |
| 5b4292e650f5f91012e6e696 |     | .D. | TK  |      | HR. | T  | S | .   | A | . |   | H | . | EVI |     |     |   |     |
| 5b4292e650f5f91012e6e77c | F   | .D. | TK  |      | HR. | T  | S | .   | A | . |   | H | . | EVI |     |     |   |     |
| 5b4292e650f5f91012e6e653 |     | .D. | TK  | V    |     |    |   | HR. | T | S | . | A | . | H   | .   | EVI |   |     |
| 5b4292e650f5f91012e6e8dd | D   | .D  | TK  |      | HR. | T  | S | .   | A | . |   | H | . | EVI |     |     |   |     |
| 5b4292e650f5f91012e6e3f1 |     | .D. | TK  |      | HR. | T  | S | .   | A | . |   | H | . | EVI |     |     |   |     |
| 5b4292e650f5f91012e6e5db |     | .D. | TK  |      | HR. | T  | S | .   | A | . |   | H | . | EVI |     |     |   |     |
| 5b4292e450f5f91012e6dfd8 |     | .D. | TK  |      | HR. | T  | S | .   | A | . |   | H | . | EVI |     |     |   |     |
| 5b4292e450f5f91012e6de79 |     |     |     | TK   |     |    |   | HR. | T | S | . | A | . | H   | .   | EVI |   |     |
| 5b4292e650f5f91012e6e640 |     | .D. | TK  |      | HR. | T  | S | .   | A | . | S | . | H | .   | EVI |     |   |     |
| 5b4292e650f5f91012e6e864 |     |     |     | .D.  | TK  |    |   | HR. | T | S | . | A | . | H   | .   | EVI |   |     |
| 5b4292e650f5f91012e6eae1 |     | .D. | TK  |      | HR. | T  | S | .   | A | . |   | H | . | EVI |     |     |   |     |
| 5b4292e650f5f91012e6e941 |     | .D. | TK  |      | HR. | T  | V | S   | . | A | . |   | H | .   | EVI |     |   |     |
| 5b4292e650f5f91012e6e6b5 |     | .D. | TK  |      | HR. | T  | S | .   | A | . |   | H | . | EVI |     |     |   |     |
| 5b4292e650f5f91012e6ebcb | H   | .D. | TK  |      | HR. | T  | S | .   | A | . |   | H | . | EVI |     |     |   |     |
| 5b4292e450f5f91012e6de5e |     | .D. | TK  |      | HR. | T  | H | S   | . | A | . |   | H | .   | EVI |     |   |     |
| 5b4292e650f5f91012e6e775 |     | .D. | TK  |      | HR. | T  | S | .   | A | . |   | H | . | EVI |     |     |   |     |
| 5b4292e650f5f91012e6e433 | A   | .D. | TK  |      | HR. | T  | S | .   | A | . |   | H | . | EVI |     |     |   |     |
| 5b4292e650f5f91012e6e72e |     | .D. | TK  |      | HR. | T  | S | .   | A | . |   | H | . | EVI |     |     |   |     |
| 5b4292e650f5f91012e6e6a0 |     | .D. | TK  |      | HR. | T  | R | S   | . | A | . |   | H | .   | EVI |     |   |     |
| 5b4292e650f5f91012e6ea23 |     | .D. | TK  |      | HR. | T  | S | .   | A | . |   | H | . | EVI |     |     |   |     |
| 5b4292e650f5f91012e6e58f |     | .D. | TK  |      | HR. | T  | S | .   | A | . |   | H | . | EVI |     |     |   |     |
| 5b4292e450f5f91012e6de2f | IHL | .D. | TK  |      | HR. | T  | S | .   | A | . |   | H | . | EVI |     |     |   |     |
| 5b4292e650f5f91012e6ed0a |     | .D. | TK  | R    |     |    |   | HR. | T | S | . | A | . | E   | .   | H   | . | EVI |
| 5b4292e650f5f91012e6e973 |     | .D. | TK  |      | HR. | T  | S | .   | A | . |   | H | . | EVI |     |     |   |     |
| 5b4292e650f5f91012e6ea8f | H   | .D. | TK  |      | HR. | T  | S | .   | A | . |   | H | . | EVI |     |     |   |     |
| 5b4292e650f5f91012e6e64a |     | .D. | TK  |      | HR. | T  | S | .   | A | . | V | . | H | .   | EVI |     |   |     |
| 5b4292e650f5f91012e6efc  | P   | .D. | TK  |      | HR. | T  | S | .   | A | . | G | . | H | .   | EVI |     |   |     |
| 5b4292e650f5f91012e6e3ad |     | .D. | TK  |      | HR. | T  | S | .   | S | . | A | . |   | H   | .   | EVI |   |     |
| 5b4292e650f5f91012e6ebd4 |     |     |     | S    | .   | A  | . | A   | . |   | . | H | . | EVI |     |     |   |     |
| 5b4292e650f5f91012e6e857 |     | .D. | TK  |      | HR. | T  | S | .   | A | . |   | H | . | EVI |     |     |   |     |
| 5b4292e650f5f91012e6ea33 |     | .D. | TK  |      | HR. | T  | S | .   | A | . |   | H | . | EVI |     |     |   |     |
| 5b4292e450f5f91012e6dea9 |     | .D. | TK  |      | HR. | T  | S | .   | M | . | A | . | H | .   | EVI |     |   |     |
| 5b4292e650f5f91012e6e67f |     | .D. | TK  |      | HR. | T  | A | S   | . | A | . |   | H | .   | EVI |     |   |     |
| 5b4292e450f5f91012e6df67 |     | .D. | TK  |      | HR. | T  | S | .   | A | . | R | . | H | .   | EVI |     |   |     |
| 5b4292e450f5f91012e6deaf |     |     |     | .D.  | TK  |    |   | HR. | T | S | . | A | . | H   | .   | EVI |   |     |
| 5b4292e650f5f91012e6ecf  |     | .D. | TK  |      | HR. | T  | S | .   | S | . | A | . |   | H   | .   | EVI |   |     |
| 5b4292e550f5f91012e6e31d |     | .D. | TK  | WYQ  | -   |    |   | HR. | T | S | . | A | . | Y   | .   | H   | . | EVI |
| 5b4292e650f5f91012e6e5ea |     | .D. | TK  |      | HR. | T  | S | .   | A | . |   | H | . | EVI |     |     |   |     |
| 5b4292e650f5f91012e6eb0f |     | .D. | TK  |      | HR. | T  | S | .   | A | . |   | H | . | EVI |     |     |   |     |
| 5b4292e650f5f91012e6eb54 |     | .D. | TK  |      | HR. | T  | S | .   | Q | . | A | . |   | H   | .   | EVI |   |     |
| 5b4292e650f5f91012e6ed01 | Q   | .D. | TK  |      | HR. | T  | S | .   | A | . |   | H | . | EVI |     |     |   |     |
| 5b4292e650f5f91012e6ed0b |     | .D. | TK  |      | HR. | T  | S | .   | V | . | A | . |   | H   | .   | EVI |   |     |
| 5b4292e450f5f91012e6e096 |     | .D. | TK  |      | HR. | T  | S | .   | A | . |   | H | . | EVI |     |     |   |     |
| 5b4292e450f5f91012e6df21 | M   | .D. | TK  |      | HR. | T  | S | .   | A | . |   | H | . | EVI |     |     |   |     |
| 5b4292e650f5f91012e6e529 |     | .D. | TK  |      | HR. | T  | S | .   | G | . | A | . |   | H   | .   | EVI |   |     |
| 5b4292e450f5f91012e6e102 |     | .D. | TK  |      | HR. | T  | G | S   | . | A | . |   | H | .   | EVI |     |   |     |
| 5b4292e650f5f91012e6eaac |     | .D. | TK  |      | HR. | T  | S | .   | A | . |   | H | . | EVI |     |     |   |     |
| 5b4292e650f5f91012e6e86f | A   | .D. | TK  |      | HR. | T  | S | .   | A | . |   | H | . | EVI |     |     |   |     |
| 5b4292e650f5f91012e6ebb9 | Q   | .D. | TK  |      | HR. | T  | S | .   | A | . |   | H | . | EVI |     |     |   |     |
| 5b4292e450f5f91012e6e0aa |     | .D. | TK  |      | HR. | T  | S | .   | A | . | D | . | H | .   | EVI |     |   |     |
| 5b4292e650f5f91012e6e39c |     | .D. | TK  |      | HR. | T  | S | .   | A | . |   | H | . | EVI |     |     |   |     |
| 5b4292e650f5f91012e6e52c |     | .D. | TK  |      | HR. | T  | S | .   | A | . | Q | . | H | .   | EVI |     |   |     |

|                          |       |    |    |      |    |    |    |     |     |     |     |   |     |
|--------------------------|-------|----|----|------|----|----|----|-----|-----|-----|-----|---|-----|
| 5b4292e450f5f91012e6df29 | .D.   | TK | R  | HR   | T  | S  | A  | H   | EVI |     |     |   |     |
| 5b4292e650f5f91012e6eb9b | .D.   | TK |    | HR   | T  | S  | A  | A   | EVI |     |     |   |     |
| 5b4292e650f5f91012e6e7be | .D.   | TN |    | HR   | T  | S  | A  | H   | EVI |     |     |   |     |
| 5b4292e650f5f91012e6e5d9 | .D.   | TK |    | HR   | T  | S  | A  | H   | EVI |     |     |   |     |
| 5b4292e450f5f91012e6df38 | .D.   | TK |    | HR   | T  | S  | A  | H   | EVI |     |     |   |     |
| 5b4292e650f5f91012e6e5c7 | .D.   | TK | H  | HR   | T  | S  | A  | H   | EVI |     |     |   |     |
| 5b4292e650f5f91012e6e52e | .D.   | TK |    | HR   | T  | S  | A  | R   | H   | EVI |     |   |     |
| 5b4292e650f5f91012e6ec40 | .D.   | TK | S  | HR   | T  | S  | A  | H   | EVI |     |     |   |     |
| 5b4292e650f5f91012e6e644 | .DF   | TK | G  | HR   | T  | R  | S  | A   | H   | EVI |     |   |     |
| 5b4292e650f5f91012e6ea7e | ----- | TK |    | HR   | T  | S  | A  | H   | EVI |     |     |   |     |
| 5b4292e650f5f91012e6e828 | .D.   | TK |    | HR   | T  | S  | A  | H   | EVI |     |     |   |     |
| 5b4292e650f5f91012e6e532 | .D.   | TK |    | HR   | P  | S  | A  | H   | EVI |     |     |   |     |
| 5b4292e650f5f91012e6eb04 | .D.   | TK |    | HR   | T  | S  | A  | H   | EVI |     |     |   |     |
| 5b4292e650f5f91012e6e78a | .DW   | TK |    | HR   | T  | S  | A  | H   | EVI |     |     |   |     |
| 5b4292e650f5f91012e6e55f | .D.   | TK |    | HR   | T  | S  | A  | H   | HW  | EVI |     |   |     |
| 5b4292e550f5f91012e6e2eb | .D.   | TK |    | HR   | T  | S  | K  | A   | H   | EVI |     |   |     |
| 5b4292e650f5f91012e6e845 | .D.   | TK |    | HR   | T  | S  | A  | H   | EVI |     |     |   |     |
| 5b4292e450f5f91012e6dfaa |       | TK | L  | HR   | T  | S  | A  | H   | EVI |     |     |   |     |
| 5b4292e650f5f91012e6e8ab |       | TK | H  | HR   | T  | S  | A  | H   | EVI |     |     |   |     |
| 5b4292e450f5f91012e6de00 |       | TK | R  | A    | HR | T  | S  | A   | H   | EVI |     |   |     |
| 5b4292e450f5f91012e6df95 | .D.   | TK |    | HR   | T  | S  | A  | G   | H   | EVI |     |   |     |
| 5b4292e450f5f91012e6dde7 | .D.   | TK |    | HR   | T  | S  | A  | H   | EVI |     |     |   |     |
| 5b4292e650f5f91012e6e6aa | .D.   | TK |    | HR   | T  | S  | L  | A   | H   | EVI |     |   |     |
| 5b4292e650f5f91012e6e4fa | .D.   | TK |    | HR   | T  | S  | A  | H   | EVI |     |     |   |     |
| 5b4292e650f5f91012e6e886 | .D.   | TK |    | HR   | T  | S  | A  | H   | EVI |     |     |   |     |
| 5b4292e650f5f91012e6e817 | .ND   | TK |    | HR   | T  | S  | A  | H   | EVI |     |     |   |     |
| 5b4292e450f5f91012e6e005 | .D.   | TK |    | HR   | T  | S  | A  | Q   | H   | EVI |     |   |     |
| 5b4292e650f5f91012e6e70b | .D.   | TK |    | HR   | T  | S  | A  | H   | EVI |     |     |   |     |
| 5b4292e450f5f91012e6e084 | ----- | TK |    | HV   | T  | S  | A  | H   | EVI |     |     |   |     |
| 5b4292e650f5f91012e6e424 | .D.   | TK |    | HRNT | T  | S  | A  | H   | EVI |     |     |   |     |
| 5b4292e650f5f91012e6e834 | .D.   | TK | D  | HR   | T  | S  | A  | H   | EVI |     |     |   |     |
| 5b4292e450f5f91012e6df7b | .D.   | TK |    | HR   | T  | S  | A  | H   | EVI |     |     |   |     |
| 5b4292e650f5f91012e6e598 | .D.   | TK |    | HR   | T  | S  | A  | H   | EVI |     |     |   |     |
| 5b4292e650f5f91012e6ec25 | .D.   | TK | G  | HR   | T  | S  | A  | H   | EVI |     |     |   |     |
| 5b4292e650f5f91012e6ebc8 | .D.   | TK |    | HR   | T  | S  | A  | E   | H   | EVI |     |   |     |
| 5b4292e650f5f91012e6e453 |       | TK | T  | HR   | T  | S  | A  | H   | EVI |     |     |   |     |
| 5b4292e650f5f91012e6e7ed |       | TK | P  | HR   | T  | S  | A  | H   | EVI |     |     |   |     |
| 5b4292e550f5f91012e6e37b |       | TK | L  | HR   | T  | S  | A  | H   | EVI |     |     |   |     |
| 5b4292e550f5f91012e6e368 | .D.   | K  |    | HR   | T  | S  | A  | H   | EVI |     |     |   |     |
| 5b4292e650f5f91012e6e4b4 |       | TK | K  | HR   | T  | S  | A  | H   | EVI |     |     |   |     |
| 5b4292e450f5f91012e6e015 | .D.   | TK | T  | HR   | T  | S  | A  | H   | EVI |     |     |   |     |
| 5b4292e450f5f91012e6e0ad | .D.   | TK |    | HR   | T  | S  | A  | H   | EVI |     |     |   |     |
| 5b4292e450f5f91012e6df96 | .D.   | TK |    | HR   | T  | S  | A  | H   | EVI |     |     |   |     |
| 5b4292e650f5f91012e6e731 | .D.   | TK |    | HR   | T  | S  | A  | H   | EVI |     |     |   |     |
| 5b4292e650f5f91012e6e5f9 | .D.   | TK |    | HR   | T  | S  | A  | H   | EVI |     |     |   |     |
| 5b4292e650f5f91012e6e654 | .D.   | TK |    | HR   | T  | S  | D  | A   | H   | EVI |     |   |     |
| 5b4292e650f5f91012e6e957 | .D.   | TK |    | HR   | T  | S  | A  | H   | EVI |     |     |   |     |
| 5b4292e650f5f91012e6ec6a | .D.   | TK |    | HR   | T  | S  | A  | H   | EVI |     |     |   |     |
| 5b4292e650f5f91012e6e85c | .D.   | TK |    | HR   | T  | S  | A  | H   | EVI |     |     |   |     |
| 5b4292e650f5f91012e6ecfb | .D.   | TK | C  | HR   | T  | S  | A  | H   | EVI |     |     |   |     |
| 5b4292e650f5f91012e6e49d | .D.   | TK | D  | HR   | T  | S  | A  | H   | EVI |     |     |   |     |
| 5b4292e650f5f91012e6e5bb |       | TK | ED | HR   | T  | S  | A  | H   | EVI |     |     |   |     |
| 5b4292e650f5f91012e6e52a |       | TK | S  | HR   | T  | S  | A  | H   | EVI |     |     |   |     |
| 5b4292e650f5f91012e6e4fb | ----- | TK |    | HR   | T  | S  | A  | H   | EVI |     |     |   |     |
| 5b4292e650f5f91012e6e54e | .D.   | TK |    | HR   | T  | S  | A  | H   | EVI |     |     |   |     |
| 5b4292e650f5f91012e6e771 | .D.   | TK |    | HR   | T  | S  | A  | D   | H   | EVI |     |   |     |
| 5b4292e650f5f91012e6e4bd | .D.   | TK |    | HR   | T  | S  | A  | H   | EVI |     |     |   |     |
| 5b4292e450f5f91012e6dfad | .D.   | TK |    | HR   | T  | S  | A  | H   | EVI |     |     |   |     |
| 5b4292e450f5f91012e6e0b5 | .D.   | TK |    | HR   | T  | S  | A  | H   | EVI |     |     |   |     |
| 5b4292e450f5f91012e6e113 |       | TK | V  | EMT  | K  | V  | S  | HR  | T   | S   | A   | H | EVI |
| 5b4292e650f5f91012e6e3ff | .D.   | TK |    | HR   | T  | S  | A  | H   | EVI |     |     |   |     |
| 5b4292e450f5f91012e6e112 | ----- | TK |    | HR   | T  | S  | A  | H   | EVI |     |     |   |     |
| 5b4292e650f5f91012e6e47c |       | TK | T  | HR   | T  | S  | A  | H   | EVI |     |     |   |     |
| 5b4292e650f5f91012e6e674 | .D.   | TK |    | HI   | T  | S  | A  | H   | EVI |     |     |   |     |
| 5b4292e650f5f91012e6e4e7 | .D.   | TK |    | HR   | T  | S  | AA | H   | EVI |     |     |   |     |
| 5b4292e650f5f91012e6e6db |       | TK | M  | HR   | T  | S  | A  | H   | EVI |     |     |   |     |
| 5b4292e650f5f91012e6ebf1 | .D.   | TK | S  | HR   | T  | S  | A  | H   | EVI |     |     |   |     |
| 5b4292e650f5f91012e6e7f0 |       | TK | L  | HR   | T  | S  | A  | H   | EVI |     |     |   |     |
| 5b4292e650f5f91012e6e7e6 | .D.   | TK |    | HR   | T  | S  | A  | H   | EVI |     |     |   |     |
| 5b4292e650f5f91012e6ec81 | ----- | TK | LT | R    | A  | HR | T  | S   | A   | H   | EVI |   |     |
| 5b4292e650f5f91012e6ebf5 | .D.   | TK |    | HR   | T  | S  | A  | H   | EVI |     |     |   |     |
| 5b4292e650f5f91012e6e451 | .D.   | TK |    | HR   | T  | S  | A  | L   | H   | EVI |     |   |     |
| 5b4292e450f5f91012e6e0e0 |       | TK | A  | HR   | T  | S  | A  | H   | EVI |     |     |   |     |
| 5b4292e450f5f91012e6e0e2 | .D.   | TK |    | HR   | T  | S  | A  | H   | EVI |     |     |   |     |
| 5b4292e650f5f91012e6eacd | .D.   | TK |    | HR   | T  | S  | T  | A   | H   | EVI |     |   |     |
| 5b4292e650f5f91012e6e5df | .D.   | TK | T  | HR   | T  | S  | A  | H   | EVI |     |     |   |     |
| 5b4292e650f5f91012e6e611 | ----- | TK |    | HR   | T  | S  | A  | H   | EVI |     |     |   |     |
| 5b4292e650f5f91012e6e491 |       | TK | M  | HR   | T  | S  | A  | H   | EVI |     |     |   |     |
| 5b4292e550f5f91012e6e2fe | .D.   | TK |    | HR   | T  | S  | E  | H   | EVI |     |     |   |     |
| 5b4292e450f5f91012e6e12c | .D.   | TK |    | PR   | T  | S  | A  | H   | EVI |     |     |   |     |
| 5b4292e650f5f91012e6e488 | .D.   | TK | M  | HR   | T  | S  | A  | H   | EVI |     |     |   |     |
| 5b4292e650f5f91012e6ed1c | .D.   | TK |    | HR   | T  | S  | A  | H   | EVI |     |     |   |     |
| 5b4292e450f5f91012e6de32 |       | TK | N  | HR   | T  | S  | A  | H   | EVI |     |     |   |     |
| 5b4292e650f5f91012e6e7c7 | .D.   | TK | V  | HR   | T  | S  | A  | H   | EVI |     |     |   |     |
| 5b4292e550f5f91012e6e347 | .D.   | TK |    | HR   | T  | S  | A  | H   | EVI |     |     |   |     |
| 5b4292e650f5f91012e6e467 |       | TK | P  | HR   | T  | S  | A  | H   | EVI |     |     |   |     |
| 5b4292e650f5f91012e6e570 |       | TK | T  | HR   | T  | S  | T  | A   | H   | EVI |     |   |     |
| 5b4292e550f5f91012e6e30f | .D.   | TK |    | HR   | T  | S  | A  | H   | EVI |     |     |   |     |
| 5b4292e450f5f91012e6dfa6 | .D.   | TK |    | HR   | T  | S  | A  | H   | EVI |     |     |   |     |
| 5b4292e650f5f91012e6e84d | .D.   | TK |    | HR   | T  | S  | A  | H   | EVI |     |     |   |     |
| 5b4292e450f5f91012e6ded7 |       | TK | P  | HR   | T  | S  | A  | H   | EVI |     |     |   |     |
| 5b4292e450f5f91012e6deaa |       | TK | G  | HR   | T  | S  | A  | H   | EVI |     |     |   |     |
| 5b4292e650f5f91012e6e813 |       | TK | P  | S    | HR | T  | S  | A   | H   | EVI |     |   |     |
| 5b4292e450f5f91012e6de52 | .D.   | TK |    | HR   | T  | P  | S  | A   | H   | EVI |     |   |     |
| 5b4292e650f5f91012e6e77d | .D.   | TK |    | HR   | T  | S  | G  | A   | H   | EVI |     |   |     |
| 5b4292e650f5f91012e6e7c2 | .D.   | TK |    | HR   | T  | S  | A  | H   | EVI |     |     |   |     |
| 5b4292e650f5f91012e6e680 | .D.   | TK |    | LHS  | T  | S  | A  | H   | EVI |     |     |   |     |
| 5b4292e550f5f91012e6e311 | .D.   | TK |    | HR   | TK | S  | A  | H   | EVI |     |     |   |     |
| 5b4292e650f5f91012e6e6d4 |       | TK | E  | HR   | T  | S  | A  | H   | EVI |     |     |   |     |
| 5b4292e650f5f91012e6e5fc | .D.   | TK |    | HRE  | T  | S  | A  | H   | EVI |     |     |   |     |
| 5b4292e550f5f91012e6e2ea | .D.   | TK |    | HR   | T  | S  | A  | I   | H   | EVI |     |   |     |
| 5b4292e650f5f91012e6e3d9 |       | TK | P  | HR   | T  | S  | A  | H   | EVI |     |     |   |     |
| 5b4292e450f5f91012e6df28 | .D.   | TK |    | HR   | T  | S  | A  | H   | EVI |     |     |   |     |
| 5b4292e650f5f91012e6e83f | .D.   | TK |    | HR   | T  | S  | E  | IPA | A   | H   | EVI |   |     |
| 5b4292e450f5f91012e6deb3 | .D.   | TK |    | HR   | T  | S  | A  | N   | H   | EVI |     |   |     |
| 5b4292e650f5f91012e6ebd1 |       | TK | D  | HR   | T  | S  | A  | H   | EVI |     |     |   |     |
