# Supplementary material for: Diverse patterns of antibody variable gene repertoire disruption in patients with amyloid light chain (AL) amyloidosis
Source: PubMed Central journal article supplement (PMC7340310; doi:10.1371/journal.pone.0235713), 2020-07-07
Supplement: pone.0235713.s006.pdf [file pone.0235713.s006.pdf]

|                          |  |   |     |  |      |    |    |   |   |   |  |     |
|--------------------------|--|---|-----|--|------|----|----|---|---|---|--|-----|
| 5b4292e850f5f91012e6f13d |  | D | TK  |  | HR   | T  | S  | A |   | H |  | EVI |
| 5b4292f950f5f91012e714f8 |  | D | TK  |  | HR   | T  | S  | A |   | H |  | EVI |
| 5b4292e850f5f91012e6f552 |  | D | TK  |  | HR   | T  | S  | A |   | H |  | EVI |
| 5b4292f950f5f91012e7155b |  | D | TK  |  | HR   | T  | S  | A |   | H |  | EVI |
| 5b4292e850f5f91012e6ef80 |  | D | TK  |  | NR   | T  | S  | A |   | H |  | EVI |
| 5b4292e850f5f91012e6f70d |  | D | TK  |  | HR   | T  | S  | A |   | H |  | EVI |
| 5b4292f950f5f91012e716aa |  | D | TK  |  | HR   | T  | S  | A |   | H |  | EVI |
| 5b4292e850f5f91012e6f1d3 |  | D | TK  |  | HR   | T  | S  | A |   | H |  | EVI |
| 5b4292f950f5f91012e716d8 |  | D | TK  |  | HR   | T  | S  | A |   | H |  | EVI |
| 5b4292e850f5f91012e6f791 |  | D | TK  |  | THR  | T  | S  | A |   | H |  | EVI |
| 5b4292e850f5f91012e6f21f |  | D | TKH |  | HR   | T  | S  | A |   | H |  | EVI |
| 5b4292e850f5f91012e6f00f |  | D | TK  |  | HR   | T  | S  | A |   | H |  | EVI |
| 5b4292e850f5f91012e6f7a2 |  | D | TK  |  | HR   | T  | S  | A |   | H |  | EVI |
| 5b4292e850f5f91012e6f125 |  | D | TK  |  | HR   | T  | S  | A |   | H |  | EVI |
| 5b4292f950f5f91012e7162a |  | D | TK  |  | HR   | T  | S  | A |   | H |  | EVI |
| 5b4292e850f5f91012e6f2e5 |  | D | TK  |  | HR   | TG | S  | A |   | H |  | EVI |
| 5b4292f950f5f91012e714f7 |  | D | TK  |  | HR   | T  | S  | A |   | H |  | EVI |
| 5b4292e850f5f91012e6f656 |  | D | TK  |  | HR   | T  | S  | A |   | H |  | EVI |
| 5b4292f950f5f91012e71569 |  | D | TK  |  | HR   | T  | S  | A |   | H |  | EVI |
| 5b4292f950f5f91012e71669 |  | D | TK  |  | HR   | T  | SK | A |   | H |  | EVI |
| 5b4292e850f5f91012e6f515 |  | D | TK  |  | HR   | T  | S  | A |   | H |  | EVI |
| 5b4292e850f5f91012e6f27e |  | D | TK  |  | HR   | T  | S  | A |   | H |  | EVI |
| 5b4292f950f5f91012e71468 |  | D | TK  |  | HR   | T  | S  | A |   | H |  | EVI |
| 5b4292e850f5f91012e6f82e |  | D | TK  |  | HR   | T  | S  | A |   | H |  | EVI |
| 5b4292f950f5f91012e71552 |  | D | TK  |  | HR   | T  | S  | A |   | H |  | EVI |
| 5b4292f950f5f91012e71465 |  | D | TK  |  | HR   | T  | S  | A |   | H |  | EVI |
| 5b4292e850f5f91012e6f697 |  | D | TKN |  | HR   | T  | S  | A |   | H |  | EVI |
| 5b4292f950f5f91012e7156d |  | D | TK  |  | HR   | T  | S  | A |   | H |  | EVI |
| 5b4292e850f5f91012e6f164 |  | D | TK  |  | HR   | T  | S  | A |   | H |  | EVI |
| 5b4292e850f5f91012e6f517 |  | D | TK  |  | HR   | T  | S  | A |   | H |  | EVI |
| 5b4292f950f5f91012e7157f |  | D | TK  |  | HR   | T  | S  | A |   | H |  | EVI |
| 5b4292e850f5f91012e6f178 |  | D | TK  |  | HR   | T  | S  | A |   | H |  | EVI |
| 5b4292f950f5f91012e71534 |  | D | TK  |  | HR   | T  | S  | A |   | H |  | EVI |
| 5b4292e850f5f91012e6f572 |  | D | TK  |  | HR   | T  | S  | A |   | H |  | EVI |
| 5b4292e850f5f91012e6f7e2 |  | D | TK  |  | HR   | T  | S  | A |   | H |  | EVI |
| 5b4292f950f5f91012e7155f |  | D | TK  |  | HR   | T  | S  | A |   | H |  | EVI |
| 5b4292f950f5f91012e71670 |  | D | TK  |  | HR   | T  | S  | A |   | H |  | EVI |
| 5b4292e850f5f91012e6efb7 |  | D | TK  |  | HR   | T  | S  | A |   | H |  | EVI |
| 5b4292f950f5f91012e71504 |  | D | TK  |  | HR   | T  | S  | A |   | H |  | EVI |
| 5b4292e850f5f91012e6f302 |  | D | TK  |  | HR   | T  | S  | A |   | H |  | EVI |
| 5b4292e850f5f91012e6f2cc |  | D | TK  |  | HR   | T  | S  | A |   | H |  | EVI |
| 5b4292e850f5f91012e6f486 |  | D | TK  |  | HR   | T  | S  | A |   | H |  | EVI |
| 5b4292f950f5f91012e71640 |  | D | TK  |  | HR   | T  | S  | A |   | H |  | EVI |
| 5b4292e850f5f91012e6f56c |  | D | TK  |  | HR   | T  | S  | A |   | H |  | EVI |
| 5b4292e850f5f91012e6f539 |  | D | TK  |  | HR   | T  | S  | A |   | H |  | EVI |
| 5b4292e850f5f91012e6efd4 |  | D | TK  |  | HR   | T  | S  | A |   | H |  | EVI |
| 5b4292f950f5f91012e71693 |  | D | TK  |  | HR   | T  | S  | A |   | H |  | EVI |
| 5b4292f950f5f91012e71539 |  | D | TK  |  | HR   | T  | S  | A |   | H |  | EVI |
| 5b4292e850f5f91012e6f165 |  | D | TK  |  | HR   | TK | S  | A |   | H |  | EVI |
| 5b4292e850f5f91012e6f5d9 |  | D | TK  |  | HR   | T  | S  | A |   | H |  | EVI |
| 5b4292e850f5f91012e6f542 |  | D | TK  |  | HR   | T  | S  | A |   | H |  | EVI |
| 5b4292e850f5f91012e6f678 |  | D | TK  |  | HR   | T  | S  | A |   | H |  | EVI |
| 5b4292f950f5f91012e716be |  | D | TK  |  | HR   | T  | S  | A |   | H |  | EVI |
| 5b4292e850f5f91012e6f7ad |  | D | TK  |  | HR   | I  | S  | A |   | H |  | EVI |
| 5b4292e850f5f91012e6f823 |  | D | TK  |  | HR   | T  | S  | A |   | H |  | EVI |
| 5b4292e850f5f91012e6efeb |  | D | TKC |  | HR   | T  | S  | A |   | H |  | EVI |
| 5b4292e850f5f91012e6f1e1 |  | D | TK  |  | HR   | T  | S  | A |   | H |  | EVI |
| 5b4292e850f5f91012e6f314 |  | D | TK  |  | HR   | T  | S  | A |   | H |  | EVI |
| 5b4292e850f5f91012e6f532 |  | D | TK  |  | HR   | T  | S  | A |   | H |  | EVI |
| 5b4292f950f5f91012e715a7 |  | D | TK  |  | HR   | T  | S  | A |   | H |  | EVI |
| 5b4292e850f5f91012e6f26e |  | D | TK  |  | HR   | T  | S  | A |   | H |  | EVI |
| 5b4292e850f5f91012e6f09d |  | D | TK  |  | HR   | T  | S  | A |   | H |  | EVI |
| 5b4292e850f5f91012e6f4d7 |  | D | TK  |  | HR   | T  | S  | A |   | H |  | EVI |
| 5b4292f950f5f91012e71604 |  | D | TK  |  | HR   | T  | S  | A |   | H |  | EVI |
| 5b4292e850f5f91012e6f17a |  | D | TK  |  | HRVT | S  | A  |   | H |   |  | EVI |
| 5b4292e850f5f91012e6f0c5 |  | D | TK  |  | HR   | T  | S  | A |   | H |  | EVI |
| 5b4292e850f5f91012e6f57e |  | D | TK  |  | HR   | T  | S  | A |   | H |  | EVI |
| 5b4292f950f5f91012e7168b |  | D | TK  |  | HR   | T  | S  | A |   | H |  | EVI |
| 5b4292e850f5f91012e6f1cc |  | D | TK  |  | HR   | T  | S  | A |   | H |  | EVI |
| 5b4292e850f5f91012e6f068 |  | D | TK  |  | HR   | T  | S  | A |   | H |  | EVI |
| 5b4292e850f5f91012e6f248 |  | D | TK  |  | HR   | T  | S  | A |   | H |  | EVI |
| 5b4292e850f5f91012e6f6fb |  | D | TK  |  | HR   | T  | S  | A |   | H |  | EVI |
| 5b4292e850f5f91012e6f28b |  | D | TK  |  | HR   | T  | S  | A |   | H |  | EVI |
| 5b4292e850f5f91012e6efb4 |  | D | TK  |  | HR   | T  | S  | A |   | H |  | EVI |
| 5b4292f950f5f91012e7163b |  | D | TK  |  | HR   | T  | S  | A |   | H |  | EVI |
| 5b4292f950f5f91012e7159b |  | D | TK  |  | HR   | T  | S  | A |   | H |  | EVI |
| 5b4292e850f5f91012e6f7fe |  | D | TK  |  | HR   | T  | S  | A |   | H |  | EVI |
| 5b4292e850f5f91012e6f6bf |  | D | TK  |  | HRGT | S  | A  |   | H |   |  | EVI |
| 5b4292e850f5f91012e6f18f |  | D | TK  |  | HR   | T  | S  | A |   | H |  | EVI |
| 5b4292e850f5f91012e6f17b |  | D | TK  |  | HR   | T  | S  | A |   | H |  | EVI |
| 5b4292f950f5f91012e7155a |  | D | TK  |  | HR   | T  | S  | A |   | H |  | EVI |
| 5b4292f950f5f91012e715d6 |  | D | TK  |  | HR   | T  | S  | A |   | H |  | EVI |
| 5b4292f950f5f91012e714a7 |  | D | TK  |  | HR   | T  | S  | A |   | H |  | EVI |
| 5b4292e850f5f91012e6f5a1 |  | D | TK  |  | HR   | T  | S  | A |   | H |  | EVI |
| 5b4292f950f5f91012e7154d |  | D | TK  |  | HR   | T  | S  | A |   | H |  | EVI |
| 5b4292e850f5f91012e6f72e |  | D | TK  |  | HR   | T  | S  | A |   | H |  | EVI |
| 5b4292e850f5f91012e6f21b |  | D | TK  |  | HR   | T  | S  | A |   | H |  | EVI |
| 5b4292e850f5f91012e6f274 |  | D | TK  |  | HR   | T  | S  | A |   | H |  | EVI |
| 5b4292e850f5f91012e6f175 |  | D | TK  |  | HR   | T  | S  | A |   | H |  | EVI |
| 5b4292e850f5f91012e6f00b |  | D | TK  |  | HR   | T  | S  | A |   | H |  | EVI |
| 5b4292f950f5f91012e71526 |  | D | TK  |  | HR   | T  | S  | A |   | H |  | EVI |
| 5b4292e850f5f91012e6f60d |  | D | TK  |  | HR   | T  | S  | A |   | H |  | EVI |
| 5b4292e850f5f91012e6f70f |  | D | TK  |  | HR   | T  | S  | A |   | H |  | EVI |
| 5b4292e850f5f91012e6f1e4 |  | D | TK  |  | HR   | T  | S  | A |   | H |  | EVI |
| 5b4292f950f5f91012e716c7 |  | D | TK  |  | HR   | T  | S  | A |   | H |  | EVI |
| 5b4292e850f5f91012e6f10e |  | D | TK  |  | HR   | T  | S  | A |   | H |  | EVI |
| 5b4292e850f5f91012e6f541 |  | D | TK  |  | HR   | T  | S  | A |   | H |  | EVI |
| 5b4292e850f5f91012e6efc4 |  | D | TK  |  | HR   | T  | S  | A |   | H |  | EVI |
| 5b4292e850f5f91012e6f265 |  | D | TK  |  | HR   | T  | S  | A |   | H |  | EVI |
| 5b4292e850f5f91012e6f623 |  | D | TK  |  | HR   | T  | S  | A |   | H |  | EVI |
| 5b4292e850f5f91012e6f1ae |  | D | TK  |  | HR   | T  | VS | A |   | H |  | EVI |
| 5b4292e850f5f91012e6f01e |  | D | TK  |  | HR   | T  | S  | A |   | H |  | EVI |
| 5b4292e850f5f91012e6f16f |  | D | TK  |  | HR   | T  | S  | A |   | H |  | EVI |
| 5b4292e850f5f91012e6f4c2 |  | D | TK  |  | HR   | T  | S  | A |   | H |  | EVI |
| 5b4292e850f5f91012e6f650 |  | D | TK  |  | HR   | T  | S  | A |   | H |  | EVI |
| 5b4292e850f5f91012e6f5c2 |  | D | TK  |  | HR   | T  | S  | A |   | H |  | EVI |



|                          |  |       |      |    |      |     |    |    |    |     |     |     |
|--------------------------|--|-------|------|----|------|-----|----|----|----|-----|-----|-----|
| 5b4292f950f5f91012e71620 |  | D     | TK   |    | HR   | T   | S  | A  | H  | EVI |     |     |
| 5b4292e850f5f91012e6f33c |  | G     | TK   |    | HR   | T   | S  | A  | H  | EVI |     |     |
| 5b4292f950f5f91012e715e7 |  | D     | TK   |    | HR   | T   | S  | A  | H  | EVI |     |     |
| 5b4292e850f5f91012e6f568 |  | D     | TK   |    | HR   | T   | S  | A  | H  | EVI | E   |     |
| 5b4292e850f5f91012e6f773 |  | L     | TK   |    | HR   | T   | S  | A  | H  | EVI |     |     |
| 5b4292e850f5f91012e6f2b9 |  | D     | TK   |    | HR   | T   | S  | A  | H  | EVI |     |     |
| 5b4292e850f5f91012e6f63b |  | D     | TK   |    | HR   | T   | S  | A  | R  | H   | EVI |     |
| 5b4292e850f5f91012e6f1fb |  | D     | TK   |    | HR   | T   | S  | A  | R  | H   | EVI |     |
| 5b4292e850f5f91012e6f472 |  | P     | T    | P  | D    | TK  |    |    |    | H   | EVI |     |
| 5b4292e850f5f91012e6f2aa |  | D     | DS   | TK |      | HR  | T  | S  | A  | H   | EVI |     |
| 5b4292e850f5f91012e6f795 |  | T     | D    | TK |      | HR  | T  | S  | A  | H   | EVI |     |
| 5b4292e850f5f91012e6f266 |  | D     | TK   |    | HR   | T   | S  | A  | H  | EVI |     |     |
| 5b4292e850f5f91012e6f794 |  | D     | TK   |    | HR   | T   | T  | S  | A  | H   | EVI |     |
| 5b4292e850f5f91012e6f08a |  | A     | D    | TK |      | HR  | T  | S  | A  | H   | EVI |     |
| 5b4292e850f5f91012e6f2f6 |  | D     | TK   |    | HR   | A   | S  | A  | H  | EVI |     |     |
| 5b4292e850f5f91012e6f569 |  | D     | TK   |    | HR   | T   | S  | A  | HW | H   | EVI |     |
| 5b4292f950f5f91012e7154a |  | L     | D    | TK |      | HR  | T  | S  | A  | H   | EVI |     |
| 5b4292e850f5f91012e6f229 |  | P     | D    | TK |      | HR  | T  | S  | A  | H   | EVI |     |
| 5b4292e850f5f91012e6efc0 |  | S     | D    | TK |      | HR  | T  | S  | A  | H   | EVI |     |
| 5b4292e850f5f91012e6f041 |  | R     | K    | D  | TK   |     | HR | T  | S  | A   | H   | EVI |
| 5b4292f950f5f91012e71609 |  | R     | D    | TK |      | HR  | T  | S  | A  | H   | EVI |     |
| 5b4292e850f5f91012e6f082 |  | D     | TK   |    | HR   | T   | V  | S  | A  | H   | EVI |     |
| 5b4292e850f5f91012e6f03a |  | D     | TK   |    | HR   | E   | T  | S  | A  | H   | EVI |     |
| 5b4292f950f5f91012e715d7 |  | R     | D    | TK |      | HR  | T  | S  | A  | H   | EVI |     |
| 5b4292e850f5f91012e6f2ec |  |       |      |    | LEM  | HR  | T  | S  | A  | H   | EVI |     |
| 5b4292e850f5f91012e6f6ef |  | D     | TK   |    | HR   | T   | S  | A  | H  | EVI |     |     |
| 5b4292f950f5f91012e71454 |  | A     | D    | TK |      | HR  | T  | S  | A  | H   | EVI |     |
| 5b4292e850f5f91012e6f574 |  | D     | TK   |    | G    | QR  | T  | S  | A  | H   | EVI |     |
| 5b4292f950f5f91012e716d0 |  | D     | TK   |    | HR   | T   | S  | A  | H  | EVI |     |     |
| 5b4292e850f5f91012e6f646 |  | D     | TK   |    | HR   | T   | S  | A  | H  | EVI |     |     |
| 5b4292e850f5f91012e6f2ee |  | D     | TK   |    | HR   | T   | S  | A  | H  | EVI |     |     |
| 5b4292e850f5f91012e6f0c4 |  | D     | TK   |    | HR   | T   | S  | A  | H  | EVI |     |     |
| 5b4292f950f5f91012e714ac |  | D     | TK   | S  |      | HR  | T  | S  | A  | H   | EVI |     |
| 5b4292f950f5f91012e715be |  | P     | R    | D  | TK   |     | HR | T  | S  | A   | H   | EVI |
| 5b4292e850f5f91012e6f805 |  | D     | TK   |    | HR   | T   | S  | A  | H  | EVI |     |     |
| 5b4292e850f5f91012e6f82f |  | V     | D    | TK |      | HR  | T  | S  | A  | H   | EVI |     |
| 5b4292f950f5f91012e714cb |  | D     | TK   |    | HR   | T   | S  | C  | A  | H   | EVI |     |
| 5b4292e850f5f91012e6f2fa |  | D     | TK   |    | HR   | N   | S  | A  | H  | EVI |     |     |
| 5b4292e850f5f91012e6f0a4 |  | D     | TK   |    | HR   | T   | S  | S  | A  | H   | EVI |     |
| 5b4292e850f5f91012e6fd8  |  | D     | TK   |    | HR   | T   | T  | S  | A  | H   | EVI |     |
| 5b4292f950f5f91012e714d5 |  | D     | TK   |    | HR   | T   | S  | A  | H  | EVI |     |     |
| 5b4292f950f5f91012e7162b |  | D     | TK   |    | HR   | T   | S  | L  | A  | H   | EVI |     |
| 5b4292f950f5f91012e71611 |  | D     | TK   |    | HR   | T   | S  | A  | R  | H   | EVI |     |
| 5b4292e850f5f91012e6f502 |  | Y     | D    | TK |      | HR  | T  | S  | A  | H   | EVI |     |
| 5b4292e850f5f91012e6f052 |  | D     | TK   |    | HR   | T   | S  | A  | H  | EVI |     |     |
| 5b4292f950f5f91012e71642 |  | D     | TK   |    | HR   | T   | S  | A  | H  | EVI |     |     |
| 5b4292e850f5f91012e6f748 |  | D     | TK   |    | HR   | T   | S  | L  | A  | H   | EVI |     |
| 5b4292e850f5f91012e6f21a |  | D     | TK   |    | HR   | T   | S  | L  | A  | H   | EVI |     |
| 5b4292e850f5f91012e6f694 |  | L     | D    | TK |      | HR  | T  | S  | A  | H   | EVI |     |
| 5b4292e850f5f91012e6f661 |  | D     | TK   |    | HR   | T   | S  | A  | H  | EVI |     |     |
| 5b4292e850f5f91012e6f652 |  | D     | TK   |    | HR   | T   | S  | P  | A  | H   | EVI |     |
| 5b4292e850f5f91012e6f641 |  | D     | TK   | V  |      | HR  | T  | S  | A  | H   | EVI |     |
| 5b4292e850f5f91012e6f6d4 |  | D     | TK   |    | HR   | T   | S  | A  | P  | H   | EVI |     |
| 5b4292e850f5f91012e6f602 |  | D     | TK   |    | HR   | T   | S  | A  | H  | EVI |     |     |
| 5b4292e850f5f91012e6f07f |  | D     | TK   |    | HR   | T   | A  | S  | A  | H   | EVI |     |
| 5b4292e850f5f91012e6f69d |  | P     | D    | TK |      | HR  | T  | S  | A  | H   | EVI |     |
| 5b4292f950f5f91012e7167c |  | D     | K    | D  | TK   |     | HR | T  | S  | A   | H   | EVI |
| 5b4292e850f5f91012e6f489 |  | D     | TK   |    | HR   | T   | S  | A  | G  | H   | EVI |     |
| 5b4292f950f5f91012e71501 |  | D     | TK   |    | HR   | T   | S  | A  | D  | H   | EVI |     |
| 5b4292e850f5f91012e6f77b |  | P     | P    | D  | TK   |     | HR | T  | S  | A   | H   | EVI |
| 5b4292e850f5f91012e6f74e |  | D     | TK   |    | HR   | T   | S  | A  | H  | EVI | N   |     |
| 5b4292e850f5f91012e6f535 |  | L     | D    | TK |      | HR  | T  | S  | A  | H   | EVI |     |
| 5b4292e850f5f91012e6f519 |  | P     | D    | TK |      | HR  | T  | S  | A  | H   | EVI |     |
| 5b4292e850f5f91012e6f65c |  | D     | TK   |    | HR   | T   | S  | A  | H  | EVI |     |     |
| 5b4292e850f5f91012e6f4fb |  | P     | D    | TK |      | THR | T  | S  | A  | H   | EVI |     |
| 5b4292e850f5f91012e6f4cc |  | S     | D    | TK |      | HR  | T  | S  | A  | H   | EVI |     |
| 5b4292e850f5f91012e6f7b7 |  | D     | TK   |    | HR   | T   | S  | P  | A  | H   | EVI |     |
| 5b4292e850f5f91012e6f4c0 |  | D     | TK   | S  |      | HR  | T  | S  | A  | H   | EVI |     |
| 5b4292e850f5f91012e6f49c |  | P     | D    | TK |      | HR  | T  | S  | A  | H   | EVI |     |
| 5b4292f950f5f91012e7145f |  | D     | TK   |    | HR   | T   | S  | K  | A  | H   | EVI |     |
| 5b4292e850f5f91012e6f6c0 |  | N     | D    | TK |      | HR  | T  | S  | A  | H   | EVI |     |
| 5b4292e850f5f91012e6f51a |  | L     | D    | TK |      | HR  | T  | S  | A  | H   | EVI |     |
| 5b4292e850f5f91012e6f47a |  | D     | TK   |    | QR   | T   | S  | A  | H  | EVI |     |     |
| 5b4292e850f5f91012e6f482 |  | P     | D    | TK |      | HR  | T  | S  | A  | H   | EVI |     |
| 5b4292e850f5f91012e6f53d |  | D     | TK   |    | HR   | T   | S  | A  | H  | EVI | S   |     |
| 5b4292e850f5f91012e6f4ab |  | D     | TK   | K  |      | HR  | T  | S  | A  | H   | EVI |     |
| 5b4292e850f5f91012e6f62c |  | D     | TK   | G  |      | HR  | T  | S  | A  | H   | EVI |     |
| 5b4292f950f5f91012e714f3 |  | D     | TK   |    | HR   | T   | Y  | A  | H  | EVI |     |     |
| 5b4292e850f5f91012e6f479 |  | D     | TK   |    | HR   | T   | S  | A  | H  | EVI |     |     |
| 5b4292e850f5f91012e6f325 |  | D     | TK   | S  |      | HR  | T  | S  | A  | H   | EVI |     |
| 5b4292e850f5f91012e6f834 |  | K     | D    | TK |      | HR  | T  | S  | A  | H   | EVI |     |
| 5b4292e850f5f91012e6f80b |  | D     | TK   |    | RHR  | T   | S  | A  | H  | EVI |     |     |
| 5b4292e850f5f91012e6f53a |  | D     | TK   |    | HR   | T   | S  | A  | H  | EVI | V   |     |
| 5b4292e850f5f91012e6f52b |  | H     | T    | S  | D    | TK  |    |    |    | H   | EVI |     |
| 5b4292e850f5f91012e6f7a4 |  | S     | D    | TK |      | HR  | T  | S  | A  | H   | EVI |     |
| 5b4292e850f5f91012e6f682 |  | D     | TK   |    | HR   | T   | S  | A  | HT | H   | EVI |     |
| 5b4292e850f5f91012e6f275 |  | D     | TK   |    | HR   | T   | S  | A  | D  | H   | EVI |     |
| 5b4292e850f5f91012e6f26d |  | D     | TK   |    | HR   | T   | S  | A  | H  | EVI |     |     |
| 5b4292e850f5f91012e6f1c5 |  | W     | D    | TK |      | HR  | T  | S  | A  | H   | EVI |     |
| 5b4292e850f5f91012e6f249 |  | K     | D    | TK |      | HR  | T  | S  | A  | H   | EVI |     |
| 5b4292e850f5f91012e6f51f |  | SYELT | PRVA | D  | TK   |     | HR | T  | S  | A   | H   | EVI |
| 5b4292e850f5f91012e6f717 |  | L     | D    | TK |      | HR  | T  | S  | A  | H   | EVI |     |
| 5b4292e850f5f91012e6f06b |  | D     | TK   |    | HR   | T   | S  | A  | H  | EVI |     |     |
| 5b4292e850f5f91012e6f206 |  | D     | TK   |    | HR   | T   | S  | AI | H  | EVI |     |     |
| 5b4292e850f5f91012e6f23e |  | D     | TK   |    | HR   | T   | S  | A  | H  | EVI |     |     |
| 5b4292e850f5f91012e6f13b |  | D     | TK   |    | HR   | T   | S  | A  | H  | EVI |     |     |
| 5b4292e850f5f91012e6f102 |  | D     | TK   | E  |      | HR  | T  | S  | A  | H   | EVI |     |
| 5b4292e850f5f91012e6f7f0 |  | D     | TK   |    | HR   | T   | S  | A  | H  | EVI |     |     |
| 5b4292f950f5f91012e715a2 |  | D     | TKFP |    | HRGT | T   | S  | A  | H  | EVI |     |     |
| 5b4292e850f5f91012e6f4e2 |  | D     | TK   | R  |      | HR  | T  | S  | A  | H   | EVI |     |
| 5b4292f950f5f91012e71561 |  | D     | TK   |    | HR   | T   | S  | A  | H  | EVI |     |     |
| 5b4292f950f5f91012e71582 |  | D     | LTK  |    | HR   | T   | S  | A  | H  | EVI |     |     |
| 5b4292e850f5f91012e6f513 |  | P     | P    | D  | TK   |     | HR | T  | S  | A   | H   | EVI |
| 5b4292f950f5f91012e71557 |  | D     | TK   |    | HR   | T   | S  | IA | H  | EVI |     |     |
| 5b4292e850f5f91012e6f7f3 |  | R     | D    | TK |      | HR  | T  | S  | A  | H   | EVI |     |
| 5b4292e850f5f91012e6f234 |  | S     | D    | TK |      | HR  | T  | S  | A  | H   | EVI |     |

|                          |  |   |    |     |      |    |    |    |   |    |     |     |
|--------------------------|--|---|----|-----|------|----|----|----|---|----|-----|-----|
| 5b4292f950f5f91012e71672 |  | H | D  | TK  | HR   | T  | S  | A  |   | H  | EVI |     |
| 5b4292e850f5f91012e6efdb |  |   | A  | TK  | HR   | T  | S  | A  |   | H  | EVI |     |
| 5b4292e850f5f91012e6f0df |  | H | D  | TK  | HR   | T  | S  | A  |   | H  | EVI |     |
| 5b4292f950f5f91012e71614 |  |   |    | TK  | HR   | T  | S  | A  | D | H  | EVI |     |
| 5b4292e850f5f91012e6f6b7 |  |   |    | TK  | HR   | T  | S  | A  |   | H  | EVI |     |
| 5b4292e850f5f91012e6f751 |  |   |    | TK  | HR   | T  | S  | A  |   | H  | EVI |     |
| 5b4292e850f5f91012e6f029 |  |   |    | TK  | HR   | T  | S  | A  | R | H  | EVI |     |
| 5b4292e850f5f91012e6f734 |  |   |    | TK  | HR   | T  | S  | A  |   | H  | EVI |     |
| 5b4292e850f5f91012e6f50d |  |   | P  | TK  | HR   | T  | S  | A  |   | H  | EVI |     |
| 5b4292e850f5f91012e6f283 |  |   |    | TK  | HR   | T  | T  | S  | A |    | H   | EVI |
| 5b4292f950f5f91012e71483 |  |   |    | TK  | HR   | T  | S  | A  | F |    | H   | EVI |
| 5b4292f950f5f91012e71484 |  |   |    | TK  | HR   | T  | S  | A  |   | H  | EVI |     |
| 5b4292e850f5f91012e6f0b8 |  |   |    | TK  | HR   | T  | S  | A  |   | H  | EVI |     |
| 5b4292e850f5f91012e6efac |  |   |    | TK  | HR   | T  | S  | A  |   | H  | EVI |     |
| 5b4292f950f5f91012e7148b |  | T | D  | TK  | HR   | T  | S  | A  | K |    | H   | EVI |
| 5b4292e850f5f91012e6f002 |  | A | D  | TK  | HR   | T  | S  | A  |   | H  | EVI |     |
| 5b4292e850f5f91012e6f222 |  |   |    | TK  | HR   | T  | S  | A  | I |    | H   | EVI |
| 5b4292e850f5f91012e6f23b |  |   |    | TK  | HR   | T  | S  | A  | K |    | H   | EVI |
| 5b4292e850f5f91012e6f30c |  |   |    | TK  | HR   | T  | S  | A  |   | H  | EVI |     |
| 5b4292e850f5f91012e6f5b5 |  |   |    | TK  | HR   | T  | S  | A  |   | H  | EVI |     |
| 5b4292e850f5f91012e6f183 |  |   | T  | TK  | HR   | T  | S  | A  |   | H  | EVI |     |
| 5b4292f950f5f91012e715ea |  |   | P  | L   | TK   | HR | T  | S  | A |    | H   | EVI |
| 5b4292f950f5f91012e7169d |  |   |    | TK  | HR   | T  | S  | A  |   | H  | EVI |     |
| 5b4292e850f5f91012e6f4d5 |  |   |    | TK  | HR   | T  | S  | A  | V |    | H   | EVI |
| 5b4292e850f5f91012e6f605 |  |   |    | TK  | HR   | T  | S  | A  |   | CH | H   | EVI |
| 5b4292e850f5f91012e6f31d |  |   |    | TK  | HR   | T  | S  | A  |   | H  | EVI |     |
| 5b4292e850f5f91012e6f289 |  |   |    | TK  | HR   | T  | S  | A  |   | H  | EVI |     |
| 5b4292e850f5f91012e6f0d6 |  |   | S  | TK  | HR   | T  | S  | A  |   | H  | EVI |     |
| 5b4292f950f5f91012e71638 |  |   |    | TK  | HR   | T  | S  | A  |   | H  | EVI |     |
| 5b4292f950f5f91012e715ca |  |   |    | TK  | HR   | T  | S  | A  |   | H  | EVI |     |
| 5b4292f950f5f91012e71649 |  |   | P  | TK  | HR   | T  | S  | A  |   | H  | EVI |     |
| 5b4292e850f5f91012e6f670 |  |   |    | TK  | HR   | T  | S  | A  |   | H  | EVI |     |
| 5b4292f950f5f91012e715e6 |  |   | G  | TK  | HR   | T  | S  | A  |   | H  | EVI |     |
| 5b4292f950f5f91012e7147c |  |   |    | TK  | HR   | T  | S  | A  |   | H  | EVI |     |
| 5b4292e850f5f91012e6f241 |  |   |    | TK  | HR   | T  | S  | A  |   | H  | EVI |     |
| 5b4292e850f5f91012e6f261 |  | D | D  | TK  | HR   | T  | S  | A  |   | H  | EVI |     |
| 5b4292f950f5f91012e715fc |  |   | S  | TK  | HR   | T  | S  | A  |   | H  | EVI |     |
| 5b4292e850f5f91012e6f716 |  |   |    | TK  | HR   | T  | S  | A  |   | D  | H   | EVI |
| 5b4292f950f5f91012e715d3 |  |   |    | TK  | HR   | T  | S  | A  |   | H  | EVI |     |
| 5b4292e850f5f91012e6f319 |  |   |    | TK  | HR   | T  | S  | Y  | A |    | H   | EVI |
| 5b4292e850f5f91012e6f583 |  |   | P  | TK  | HR   | T  | S  | A  |   | H  | EVI |     |
| 5b4292e850f5f91012e6f088 |  |   | P  | TK  | HR   | T  | S  | A  |   | H  | EVI |     |
| 5b4292f950f5f91012e71506 |  |   |    | TK  | HR   | T  | S  | A  |   | H  | EVI |     |
| 5b4292f950f5f91012e71596 |  | H | D  | TK  | HR   | T  | S  | A  |   | H  | EVI |     |
| 5b4292e850f5f91012e6f705 |  |   |    | TK  | HR   | T  | S  | A  | G |    | H   | EVI |
| 5b4292f950f5f91012e716b0 |  |   |    | TK  | HR   | T  | S  | A  |   | H  | EVI |     |
| 5b4292e850f5f91012e6f2a6 |  | L | D  | TK  | HR   | T  | S  | A  |   | H  | EVI |     |
| 5b4292f950f5f91012e715ae |  |   |    | TK  | HR   | T  | S  | Y  | A |    | H   | EVI |
| 5b4292e850f5f91012e6efad |  |   |    | TK  | HR   | T  | S  | A  |   | H  | EVI |     |
| 5b4292e850f5f91012e6f7c3 |  |   |    | TK  | HR   | T  | S  | A  |   | H  | EVI |     |
| 5b4292e850f5f91012e6f221 |  |   |    | TK  | HR   | T  | S  | A  |   | H  | EVI |     |
| 5b4292f950f5f91012e716c3 |  |   |    | TK  | HR   | T  | S  | A  |   | H  | EVI |     |
| 5b4292e850f5f91012e6f243 |  |   |    | TK  | HR   | T  | S  | A  |   | H  | EVI |     |
| 5b4292e850f5f91012e6f7f9 |  |   |    | TK  | HR   | T  | S  | A  |   | H  | EVI |     |
| 5b4292e850f5f91012e6f179 |  |   |    | TK  | HR   | T  | S  | A  |   | H  | EVI |     |
| 5b4292e850f5f91012e6f151 |  |   | GD | TK  | HR   | T  | S  | A  |   | H  | EVI |     |
| 5b4292f950f5f91012e71568 |  |   |    | TK  | HR   | T  | S  | A  |   | H  | EVI |     |
| 5b4292e850f5f91012e6f1cf |  |   |    | TK  | HR   | T  | S  | A  |   | H  | EVI |     |
| 5b4292f950f5f91012e71646 |  |   |    | TK  | HR   | T  | S  | A  | S |    | H   | EVI |
| 5b4292e850f5f91012e6f744 |  |   | P  | TK  | HR   | T  | S  | A  |   | H  | EVI |     |
| 5b4292f950f5f91012e715cd |  |   | P  | L   | R    | TK | HR | T  | S | A  | H   | EVI |
| 5b4292e850f5f91012e6f72f |  |   |    | TK  | HR   | T  | S  | A  | S |    | H   | EVI |
| 5b4292e850f5f91012e6f4ed |  |   |    | TK  | HR   | T  | S  | A  | V |    | H   | EVI |
| 5b4292e850f5f91012e6f2b8 |  | H | D  | TK  | HR   | T  | S  | A  |   | H  | EVI |     |
| 5b4292e850f5f91012e6f292 |  |   | R  | TKN | HR   | T  | S  | A  |   | H  | EVI |     |
| 5b4292e850f5f91012e6f298 |  |   |    | TK  | HR   | T  | S  | AS |   | H  | EVI |     |
| 5b4292e850f5f91012e6f160 |  |   |    | T   | HR   | T  | S  | A  |   | H  | EVI |     |
| 5b4292e850f5f91012e6f48f |  |   |    | TK  | HRAT | S  | A  |    |   | H  | EVI |     |
| 5b4292e850f5f91012e6f2cd |  |   |    | TK  | HR   | T  | S  | A  |   | H  | EVI |     |
| 5b4292f950f5f91012e71681 |  |   |    | TK  | HR   | T  | S  | A  |   | H  | EVI |     |
| 5b4292f950f5f91012e716a1 |  |   | P  | TK  | HR   | T  | S  | A  | G |    | H   | EVI |
| 5b4292e850f5f91012e6f27b |  |   |    | TK  | HR   | T  | S  | A  |   | H  | EVI |     |
| 5b4292e850f5f91012e6f33d |  |   |    | TK  | HR   | T  | S  | A  |   | H  | EVI |     |
| 5b4292e850f5f91012e6f726 |  |   |    | TK  | HR   | T  | S  | A  | F |    | H   | EVI |
| 5b4292e850f5f91012e6ef8f |  |   | V  | TK  | HR   | T  | S  | A  |   | H  | EVI |     |
| 5b4292f950f5f91012e71579 |  |   |    | E   | TK   | HR | T  | S  | A |    | H   | EVI |
| 5b4292f950f5f91012e714dd |  |   |    | TK  | HR   | T  | S  | A  |   | H  | EVI |     |
| 5b4292e850f5f91012e6f024 |  |   |    | TK  | HR   | T  | S  | A  |   | H  | EVI |     |
| 5b4292f950f5f91012e715b7 |  |   | F  | TK  | HR   | T  | S  | A  |   | H  | EVI |     |
| 5b4292f950f5f91012e714de |  |   |    | TK  | HR   | T  | S  | A  |   | H  | EVI |     |
| 5b4292f950f5f91012e71477 |  |   |    | TK  | HR   | T  | S  | A  |   | H  | EVI |     |
| 5b4292f950f5f91012e714b6 |  |   |    | TK  | HR   | T  | S  | A  | I |    | H   | EVI |
| 5b4292e850f5f91012e6f801 |  |   | P  | TK  | HR   | T  | S  | A  |   | H  | EVI |     |
| 5b4292e850f5f91012e6f1b8 |  |   | P  | TK  | HR   | T  | S  | A  |   | H  | EVI |     |
| 5b4292e850f5f91012e6f4ee |  |   |    | TK  | HR   | T  | S  | A  |   | H  | EVI |     |
| 5b4292e850f5f91012e6f16a |  |   |    | TK  | HR   | T  | S  | A  |   | H  | EVI |     |
| 5b4292e850f5f91012e6f349 |  |   |    | TK  | HR   | T  | S  | A  |   | H  | EVI |     |
| 5b4292f950f5f91012e71499 |  |   |    | TK  | HR   | T  | S  | A  |   | H  | EVI |     |
| 5b4292e850f5f91012e6f170 |  | H | D  | TK  | HR   | T  | S  | A  |   | H  | EVI |     |
| 5b4292e850f5f91012e6f7a3 |  |   |    | TK  | HR   | T  | SD | A  |   | H  | EVI |     |
| 5b4292e850f5f91012e6f807 |  |   |    | TK  | HR   | T  | S  | A  |   | H  | EVI |     |
| 5b4292f950f5f91012e714d8 |  |   |    | TK  | HR   | T  | S  | A  |   | H  | EVI |     |
| 5b4292e850f5f91012e6f832 |  |   |    | TK  | HR   | T  | S  | A  |   | H  | EVI |     |
| 5b4292f950f5f91012e714fe |  |   |    | TK  | HR   | T  | S  | A  |   | H  | EVI |     |
| 5b4292e850f5f91012e6effd |  | E | D  | TK  | HR   | T  | S  | A  |   | H  | EVI |     |
| 5b4292e850f5f91012e6f2a9 |  |   |    | TK  | HR   | T  | S  | AA |   | H  | EVI |     |
| 5b4292f950f5f91012e7150f |  |   |    | TK  | HR   | T  | S  | A  | S |    | H   | EVI |
| 5b4292f950f5f91012e7148e |  | P | D  | TK  | HR   | T  | S  | A  |   | H  | EVI |     |
| 5b4292f950f5f91012e7152e |  |   |    | TK  | HR   | T  | S  | A  | A |    | H   | EVI |
| 5b4292e850f5f91012e6f220 |  |   |    | TK  | HR   | T  | S  | A  |   | H  | EVI |     |
| 5b4292e850f5f91012e6f020 |  |   | AD | TK  | HR   | T  | S  | A  |   | H  | EVI |     |
| 5b4292f950f5f91012e715c0 |  |   | F  | TK  | HR   | T  | S  | A  |   | H  | EVI |     |
| 5b4292e850f5f91012e6f662 |  |   |    | TK  | HR   | T  | S  | A  |   | H  | EVI |     |
| 5b4292e850f5f91012e6f20b |  | P | P  | L   | TK   | HR | T  | S  | A |    | H   | EVI |
| 5b4292f950f5f91012e71615 |  |   |    | TK  | HR   | T  | S  | A  |   | H  | EVI |     |
| 5b4292f950f5f91012e714ec |  |   |    | TK  | HR   | T  | S  | A  | E |    | H   | EVI |

|                           |    |    |      |        |      |    |   |     |     |     |     |
|---------------------------|----|----|------|--------|------|----|---|-----|-----|-----|-----|
| 5b4292e850f5f91012e6f08d  |    | HD | TK   | HR     | T    | S  | A | H   | EVI |     |     |
| 5b4292e850f5f91012e6eff1  |    | D  | TK   | HR     | T    | S  | C | H   | EVI |     |     |
| 5b4292e850f5f91012e6f804  | A  | D  | TK   | HR     | T    | S  | A | H   | EVI |     |     |
| 5b4292e850f5f91012e6f0f0  |    |    | DLPK | HR     | T    | S  | A | H   | EVI |     |     |
| 5b4292e850f5f91012e6f5dc  |    |    | D    | TK     | HR   | T  | S | A   | EVI |     |     |
| 5b4292f950f5f91012e71494  | G  | D  | TK   | HR     | T    | S  | A | H   | EVI |     |     |
| 5b4292e850f5f91012e6f4ea  |    |    | D    | TK     | HR   | T  | S | A   | EVI |     |     |
| 5b4292e850f5f91012e6f0a8  |    |    | D    | TK     | HR   | T  | S | A   | EVI |     |     |
| 5b4292e850f5f91012e6f182  |    |    | D    | TK     | N    | HR | T | S   | A   | EVI |     |
| 5b4292e850f5f91012e6f595  | K  | D  | K    | HR     | T    | S  | A | H   | EVI |     |     |
| 5b4292e850f5f91012e6f02b  |    |    | D    | TK     | QR   | T  | S | A   | EVI |     |     |
| 5b4292f950f5f91012e7159f  |    |    | D    | TK     | HR   | T  | S | A   | EVI |     |     |
| 5b4292e850f5f91012e6f7ec  |    |    | D    | TK     | HR   | T  | S | L   | A   | EVI |     |
| 5b4292e850f5f91012e6f1d1  |    |    | D    | TKH    | HR   | T  | S | A   | L   | EVI |     |
| 5b4292f950f5f91012e715b9  |    |    | D    | TK     | HR   | T  | S | P   | A   | EVI |     |
| 5b4292f950f5f91012e71581  |    |    | D    | TK     | HR   | T  | S | A   | F   | EVI |     |
| 5b4292e850f5f91012e6f699  |    |    | D    | TK     | T    | HR | T | S   | A   | EVI |     |
| 5b4292e850f5f91012e6f32c  | P  | D  | TK   | HR     | T    | S  | A | H   | EVI |     |     |
| 5b4292f950f5f91012e714ee  |    |    | D    | TK     | HR   | T  | S | A   | H   | EVI |     |
| 5b4292f950f5f91012e71651  | P  | D  | TK   | HR     | T    | S  | A | H   | EVI |     |     |
| 5b4292e850f5f91012e6ef8a  | P  | D  | TK   | HR     | T    | S  | A | H   | EVI |     |     |
| 5b4292e850f5f91012e6efb9  | E  | D  | TK   | HR     | T    | S  | A | H   | EVI |     |     |
| 5b4292e850f5f91012e6ff1da | A  | D  | TK   | HR     | T    | S  | A | H   | EVI |     |     |
| 5b4292f950f5f91012e7166c  |    |    | D    | TK     | HR   | T  | S | A   | H   | EVI |     |
| 5b4292e850f5f91012e6f1f3  |    |    | D    | TK     | HR   | T  | S | A   | F   | EVI |     |
| 5b4292f950f5f91012e7154f  |    |    | D    | TK     | HR   | T  | S | A   | K   | EVI |     |
| 5b4292f950f5f91012e7154b  | E  | TK | HR   | T      | S    | A  | H | EVI |     |     |     |
| 5b4292e850f5f91012e6f68f  | P  | P  | D    | TK     | HR   | T  | S | A   | H   | EVI |     |
| 5b4292e850f5f91012e6f26a  | N  | D  | TK   | HR     | T    | S  | A | H   | EVI |     |     |
| 5b4292e850f5f91012e6f237  |    |    | D    | TK     | HR   | T  | W | S   | A   | EVI |     |
| 5b4292e850f5f91012e6f7f6  | M  | D  | TK   | S      | HR   | T  | S | A   | H   | EVI |     |
| 5b4292e850f5f91012e6f099  | S  | D  | TK   | HR     | T    | S  | A | H   | Q   | EVI |     |
| 5b4292e850f5f91012e6f6fd  |    |    | D    | TK     | HR   | T  | S | A   | V   | EVI |     |
| 5b4292f950f5f91012e714f4  |    |    | D    | QTK    | HR   | T  | S | A   | H   | EVI |     |
| 5b4292e850f5f91012e6f191  | C  | D  | TK   | HR     | T    | S  | A | H   | EVI |     |     |
| 5b4292f950f5f91012e71543  |    |    | D    | TK     | HR   | T  | S | A   | H   | EVI |     |
| 5b4292f950f5f91012e7167f  | M  | D  | TK   | HR     | T    | S  | A | H   | EVI |     |     |
| 5b4292e850f5f91012e6ef9e  | P  | D  | TK   | HR     | T    | S  | A | H   | EVI |     |     |
| 5b4292e850f5f91012e6f27a  | R  | A  | D    | TK     | HR   | T  | S | A   | H   | EVI |     |
| 5b4292e850f5f91012e6f4bb  |    |    | D    | TK     | H    | HR | T | S   | A   | H   | EVI |
| 5b4292e850f5f91012e6f2d5  |    |    | D    | TK     | HR   | T  | S | A   | H   | EVI |     |
| 5b4292e850f5f91012e6f613  | G  | D  | TK   | HR     | T    | S  | A | H   | EVI |     |     |
| 5b4292e850f5f91012e6f31c  |    |    | D    | TK     | HR   | T  | S | A   | H   | EVI |     |
| 5b4292f950f5f91012e714b7  |    |    | D    | TK     | HR   | T  | S | A   | H   | EVI |     |
| 5b4292e850f5f91012e6f7c6  | P  | D  | TK   | HR     | T    | S  | A | H   | EVI |     |     |
| 5b4292e850f5f91012e6efe0  | Q  | D  | TK   | HR     | T    | S  | A | H   | EVI |     |     |
| 5b4292f950f5f91012e7156a  |    |    | D    | TK     | HR   | T  | S | A   | H   | EVI |     |
| 5b4292e850f5f91012e6f53f  | P  | P  | D    | TK     | HR   | T  | S | A   | H   | EVI |     |
| 5b4292e850f5f91012e6f742  |    |    | D    | TK     | C    | HR | T | S   | A   | H   | EVI |
| 5b4292f950f5f91012e7147a  |    |    | D    | TK     | H    | HR | T | S   | A   | H   | EVI |
| 5b4292e850f5f91012e6f6c1  | P  | S  | D    | TK     | HR   | T  | S | A   | H   | EVI |     |
| 5b4292e850f5f91012e6f181  | I  | D  | TK   | HR     | T    | S  | A | H   | EVI |     |     |
| 5b4292e850f5f91012e6f7c0  |    |    | D    | TK     | HR   | T  | S | A   | H   | EVI |     |
| 5b4292e850f5f91012e6f493  | P  | D  | TK   | HR     | T    | S  | A | H   | EVI |     |     |
| 5b4292e850f5f91012e6f32a  |    |    | D    | TK     | N    | HR | T | S   | A   | H   | EVI |
| 5b4292f950f5f91012e71625  | E  | TK | HR   | T      | S    | A  | H | EVI |     |     |     |
| 5b4292f950f5f91012e714b9  |    |    | D    | TK     | HR   | T  | S | A   | H   | EVI |     |
| 5b4292e850f5f91012e6f085  | DF | TK | HR   | T      | S    | A  | H | EVI |     |     |     |
| 5b4292e850f5f91012e6f059  | A  | D  | TK   | HR     | T    | S  | A | H   | EVI |     |     |
| 5b4292e850f5f91012e6f6cb  |    |    | D    | TK     | HR   | T  | S | A   | H   | EVI |     |
| 5b4292f950f5f91012e715ab  |    |    | D    | TK     | H    | HR | T | S   | A   | H   | EVI |
| 5b4292f950f5f91012e71585  |    |    | D    | TK     | HR   | I  | S | A   | H   | EVI |     |
| 5b4292f950f5f91012e714c7  |    |    | D    | TK     | HR   | T  | S | A   | H   | EVI |     |
| 5b4292e850f5f91012e6f0aa  | A  | D  | TK   | HR     | T    | S  | A | E   | H   | EVI |     |
| 5b4292e850f5f91012e6f180  | G  | D  | TK   | HR     | T    | S  | A | H   | EVI |     |     |
| 5b4292e850f5f91012e6f73c  |    |    | D    | TTK    | HR   | T  | S | A   | H   | EVI |     |
| 5b4292e850f5f91012e6f018  |    |    | D    | TK     | HR   | T  | S | A   | H   | EVI |     |
| 5b4292e850f5f91012e6f0fb  |    |    | D    | TK     | S    | HR | T | S   | A   | H   | EVI |
| 5b4292f950f5f91012e715a5  |    |    | D    | TK     | LR   | T  | S | A   | H   | EVI |     |
| 5b4292f950f5f91012e7158b  |    |    | D    | LPTKYA | HR   | T  | S | A   | H   | EVI |     |
| 5b4292e850f5f91012e6f0ec  |    |    | D    | TK     | HR   | T  | S | L   | A   | H   | EVI |
| 5b4292e850f5f91012e6f1bb  |    |    | D    | TK     | HR   | T  | S | R   | A   | H   | EVI |
| 5b4292f950f5f91012e7165a  | N  | A  | D    | TK     | HR   | T  | S | A   | H   | EVI |     |
| 5b4292e850f5f91012e6f4f0  | L  | D  | TK   | HR     | T    | S  | A | H   | EVI |     |     |
| 5b4292e850f5f91012e6f704  |    |    | D    | TK     | HR   | T  | S | A   | H   | EVI |     |
| 5b4292e850f5f91012e6f2c6  |    |    | D    | TK     | D    | HR | T | S   | A   | H   | EVI |
| 5b4292f950f5f91012e715c6  |    |    | D    | TK     | HRNT | S  | A | H   | EVI |     |     |
| 5b4292f950f5f91012e71553  | G  | D  | TK   | HR     | T    | S  | A | H   | EVI |     |     |
| 5b4292e850f5f91012e6f00e  |    |    | D    | TK     | D    | HR | T | S   | A   | H   | EVI |
| 5b4292e850f5f91012e6f756  | P  | D  | TK   | HR     | T    | S  | A | H   | EVI |     |     |
| 5b4292f950f5f91012e7146a  |    |    | D    | TK     | HR   | T  | S | A   | D   | H   | EVI |
| 5b4292f950f5f91012e71574  |    |    | D    | TK     | HR   | T  | S | A   | H   | EVI |     |
| 5b4292e850f5f91012e6f589  | GV | D  | TK   | HR     | T    | S  | A | H   | EVI |     |     |
| 5b4292f950f5f91012e71663  | M  | P  | D    | TK     | HR   | T  | S | A   | H   | EVI |     |
| 5b4292e850f5f91012e6f658  | P  | D  | TK   | HR     | T    | S  | A | H   | EVI |     |     |
| 5b4292e850f5f91012e6f581  | L  | D  | TK   | HR     | T    | S  | A | H   | EVI |     |     |
| 5b4292e850f5f91012e6f33e  |    |    | D    | TK     | HR   | T  | S | A   | H   | EVI |     |
| 5b4292e850f5f91012e6f0d0  |    |    | D    | TK     | HR   | T  | S | A   | H   | EVI |     |
| 5b4292f950f5f91012e71503  |    |    | D    | TK     | HR   | T  | S | A   | H   | EVI |     |
| 5b4292e850f5f91012e6f57f  |    |    | D    | TK     | HR   | T  | S | A   | H   | EVI |     |
| 5b4292f950f5f91012e715d8  |    |    | D    | TK     | HR   | T  | K | S   | A   | H   | EVI |
| 5b4292e850f5f91012e6f743  |    |    | D    | TK     | HR   | T  | S | A   | H   | EVI |     |
| 5b4292e850f5f91012e6f1bd  |    |    | D    | TK     | HR   | T  | S | A   | H   | EVI |     |
| 5b4292e850f5f91012e6f06e  |    |    | D    | TK     | HR   | T  | S | A   | H   | EVI |     |
| 5b4292e850f5f91012e6f516  | P  | D  | TK   | HR     | T    | S  | A | V   | H   | EVI |     |
| 5b4292e850f5f91012e6f13e  |    |    | D    | TK     | HR   | T  | S | A   | A   | H   | EVI |
| 5b4292e850f5f91012e6f4de  |    |    | D    | TK     | HR   | T  | S | P   | A   | H   | EVI |
| 5b4292e850f5f91012e6f297  |    |    | D    | TK     | HR   | T  | S | S   | A   | H   | EVI |
| 5b4292f950f5f91012e715b2  | S  | D  | TK   | HR     | T    | S  | A | H   | EVI |     |     |
| 5b4292e850f5f91012e6f526  | S  | D  | TK   | HR     | T    | S  | A | H   | EVI |     |     |
| 5b4292e850f5f91012e6f076  |    |    | D    | TK     | HR   | T  | S | A   | H   | EVI |     |
| 5b4292e850f5f91012e6f6f4  |    |    | D    | TK     | HR   | T  | S | A   | H   | EVI |     |
| 5b4292f950f5f91012e71473  |    |    | D    | TKH    | HR   | T  | S | A   | H   | EVI |     |
| 5b4292e850f5f91012e6ef81  | H  | S  | D    | TK     | HR   | T  | S | A   | H   | EVI |     |
| 5b4292e850f5f91012e6f1f7  |    |    | D    | TK     | HR   | T  | S | A   | H   | EVI |     |
| 5b4292f950f5f91012e71683  | A  | D  | TK   | HR     | T    | S  | A | H   | EVI |     |     |

|                          |    |      |     |    |    |    |    |    |   |     |     |     |
|--------------------------|----|------|-----|----|----|----|----|----|---|-----|-----|-----|
| 5b4292e850f5f91012e6f1f8 | R  | D    | TK  | D  | HR | T  | S  | A  | H | EVI |     |     |
| 5b4292e850f5f91012e6f130 |    | D    | TK  |    | HR | T  | S  | T  | H | EVI |     |     |
| 5b4292e850f5f91012e6f2ed |    | D    | TK  |    | HR | T  | S  | A  | G | H   | EVI |     |
| 5b4292f950f5f91012e714e7 |    | D    | TK  |    | HR | T  | S  | A  |   | H   | EVI |     |
| 5b4292e850f5f91012e6f0b2 | P  | D    | TK  |    | HR | T  | S  | A  |   | H   | EVI |     |
| 5b4292e850f5f91012e6f62e |    | D    | TK  |    | HR | T  | S  | A  | D | H   | EVI |     |
| 5b4292e850f5f91012e6ef7f |    | D    | TK  | T  | HR | T  | S  | A  |   | H   | EVI |     |
| 5b4292e850f5f91012e6ef88 |    | D    | TK  |    | HR | T  | T  | S  | A | H   | EVI |     |
| 5b4292e850f5f91012e6f2d4 |    | D    | TK  |    | HR | T  | NS | A  |   | H   | EVI |     |
| 5b4292e850f5f91012e6f2c8 |    | D    | TK  |    | HR | T  | S  | L  | A | H   | EVI |     |
| 5b4292e850f5f91012e6f067 | L  | D    | TK  |    | HR | T  | S  | A  |   | H   | EVI |     |
| 5b4292e850f5f91012e6f1de |    | D    | TK  |    | HR | T  | S  | A  |   | H   | EVI |     |
| 5b4292e850f5f91012e6f1db | V  | D    | TK  |    | HR | T  | S  | A  |   | H   | EVI |     |
| 5b4292e850f5f91012e6f177 |    | D    | TK  |    | HR | T  | S  | A  |   | H   | EVI |     |
| 5b4292e850f5f91012e6efff |    | D    | TK  |    | HR | T  | S  | S  | A | H   | EVI |     |
| 5b4292e850f5f91012e6f793 | P  | L    | D   | TK |    | HR | T  | S  | A | H   | EVI |     |
| 5b4292e850f5f91012e6f5c6 |    | D    | TK  |    | HS | T  | S  | A  |   | H   | EVI |     |
| 5b4292f950f5f91012e715b6 |    | D    | TK  |    | HR | T  | S  | A  |   | H   | EVI |     |
| 5b4292e850f5f91012e6f336 |    | D    | TK  |    | HR | T  | S  | C  | A | H   | EVI |     |
| 5b4292e850f5f91012e6f719 | H  | D    | TK  |    | HR | T  | S  | A  |   | H   | EVI |     |
| 5b4292e850f5f91012e6efe2 |    | D    | TK  | L  | HR | T  | S  | A  |   | H   | EVI |     |
| 5b4292e850f5f91012e6f264 | D  | D    | TK  |    | HR | T  | S  | A  |   | H   | EVI |     |
| 5b4292e850f5f91012e6f2dd |    | D    | TK  |    | HR | T  | S  | A  |   | H   | EVI |     |
| 5b4292e850f5f91012e6f2b7 |    | D    | TK  | G  | HR | T  | S  | A  |   | H   | EVI |     |
| 5b4292f950f5f91012e71502 |    | D    | TK  |    | HR | T  | S  | A  | D | H   | EVI |     |
| 5b4292e850f5f91012e6f0a2 | P  | D    | TK  |    | H  | T  | S  | A  |   | H   | EVI |     |
| 5b4292e850f5f91012e6f55e |    | D    | TK  |    | HR | T  | S  | A  |   | H   | EVI |     |
| 5b4292e850f5f91012e6f83d |    | D    | TK  |    | HR | T  | S  | A  | R | H   | EVI |     |
| 5b4292f950f5f91012e715f7 |    | D    | TK  |    | HR | T  | S  | A  |   | H   | EVI |     |
| 5b4292f950f5f91012e71599 |    | D    | TK  |    | HR | T  | S  | A  |   | HY  | EVI |     |
| 5b4292e850f5f91012e6f31f | T  | PRVA | D   | TK |    | HR | T  | S  | A | H   | EVI |     |
| 5b4292e850f5f91012e6f6cf | L  | D    | TK  |    | HR | T  | S  | A  |   | H   | EVI |     |
| 5b4292e850f5f91012e6f2f9 |    | D    | TK  |    | HR | T  | S  | A  |   | H   | EVI |     |
| 5b4292f950f5f91012e715a9 |    | D    | TK  |    | HR | T  | S  | A  |   | H   | EVI |     |
| 5b4292e850f5f91012e6f202 |    | D    | TK  | Q  | HR | T  | S  | A  |   | H   | EVI |     |
| 5b4292e850f5f91012e6f25c | G  | D    | TK  |    | HR | T  | S  | A  |   | H   | EVI |     |
| 5b4292e850f5f91012e6f665 |    | D    | TK  | G  | HR | T  | S  | A  |   | H   | EVI |     |
| 5b4292e850f5f91012e6f600 |    | D    | TK  |    | HR | T  | S  | A  |   | H   | EVI |     |
| 5b4292f950f5f91012e7153d | M  | D    | TK  |    | HR | T  | S  | A  |   | H   | EVI |     |
| 5b4292e850f5f91012e6f723 | L  | D    | QTK |    | HR | T  | S  | A  |   | H   | EVI |     |
| 5b4292f950f5f91012e7159a |    | D    | TK  |    | HR | T  | A  | S  | A | H   | EVI |     |
| 5b4292e850f5f91012e6f84b | P  | D    | TK  |    | HR | T  | S  | A  |   | H   | EVI |     |
| 5b4292f950f5f91012e7153c |    | D    | TK  |    | HR | T  | S  | A  |   | H   | EVI |     |
| 5b4292e850f5f91012e6f492 |    | D    | TK  |    | HR | T  | S  | A  |   | H   | EVI |     |
| 5b4292e850f5f91012e6f7a8 |    | D    | TK  |    | HR | T  | S  | A  |   | H   | EVI |     |
| 5b4292e850f5f91012e6f2b6 |    | D    | TK  |    | HR | T  | S  | A  |   | E   | H   | EVI |
| 5b4292e850f5f91012e6f7e5 |    | D    | TK  | H  | HR | T  | S  | A  |   | H   | EVI |     |
| 5b4292f950f5f91012e71518 |    | D    | TK  |    | HR | T  | S  | A  |   | H   | EVI |     |
| 5b4292f950f5f91012e71650 |    | D    | TK  | D  | HR | T  | S  | A  |   | H   | EVI |     |
| 5b4292e850f5f91012e6f2e9 | H  | D    | DF  | TK |    | HR | T  | S  | A | F   | H   | EVI |
| 5b4292f950f5f91012e716a0 | R  | D    | TK  |    | HR | T  | S  | A  |   | H   | EVI |     |
| 5b4292e850f5f91012e6f0b1 |    | D    | TK  |    | HR | T  | S  | A  |   | H   | EVI |     |
| 5b4292e850f5f91012e6f097 |    | D    | TK  |    | HR | T  | S  | C  | A | H   | EVI |     |
| 5b4292e850f5f91012e6f1ce |    | D    | TK  | Q  | HR | T  | S  | A  |   | DH  | H   | EVI |
| 5b4292f950f5f91012e714a6 | L  | D    | TK  |    | HR | T  | S  | A  |   | H   | EVI |     |
| 5b4292f950f5f91012e716db |    | D    | TK  |    | HR | T  | S  | AK |   | H   | EVI |     |
| 5b4292f950f5f91012e71653 |    | D    | TK  |    | HR | T  | S  | A  |   | H   | EVI |     |
| 5b4292f950f5f91012e714cf | N  | TK   |     |    | HR | T  | S  | A  |   | H   | EVI |     |
| 5b4292e850f5f91012e6f071 |    | D    | TK  |    | HR | T  | S  | A  |   | D   | H   | EVI |
| 5b4292e850f5f91012e6f162 |    | D    | TK  |    | HR | T  | S  | A  |   | H   | EVI |     |
| 5b4292e850f5f91012e6f48c |    | D    | TK  |    | HR | T  | W  | S  | A |     | H   | EVI |
| 5b4292e850f5f91012e6ef91 |    | D    | TK  |    | HR | T  | S  | A  |   | H   | EVI |     |
| 5b4292e850f5f91012e6f306 |    | D    | TK  |    | HR | T  | S  | A  |   | H   | EVI |     |
| 5b4292e850f5f91012e6f772 |    | D    | TK  |    | HR | T  | SS | A  |   | H   | EVI |     |
| 5b4292e850f5f91012e6f128 | D  | H    | P   | D  | TK |    | S  | A  |   | H   | EVI |     |
| 5b4292f950f5f91012e7166d |    | D    | TK  |    | HR | T  | SG | A  |   | H   | EVI |     |
| 5b4292f950f5f91012e71566 |    | D    | TK  |    | HR | T  | S  | A  |   | H   | EVI |     |
| 5b4292e850f5f91012e6f71a |    | D    | TK  | T  | HR | T  | S  | A  |   | H   | EVI |     |
| 5b4292f950f5f91012e716bb |    | D    | TK  |    | HR | T  | S  | A  |   | H   | EVI |     |
| 5b4292e850f5f91012e6f337 | P  | D    | TK  |    | HR | T  | S  | A  |   | H   | EVI |     |
| 5b4292e850f5f91012e6f811 |    | D    | TK  |    | HR | T  | S  | A  |   | H   | EVI |     |
| 5b4292f950f5f91012e71610 |    | D    | TK  |    | HR | T  | S  | A  |   | H   | EVI |     |
| 5b4292e850f5f91012e6f59c |    | D    | AK  |    | HR | T  | S  | A  |   | H   | EVI |     |
| 5b4292e850f5f91012e6f1e2 | A  | H    | D   | TK |    | HR | T  | S  | A |     | H   | EVI |
| 5b4292e850f5f91012e6f7d0 |    | D    | TKF |    | HR | T  | S  | A  |   | H   | EVI |     |
| 5b4292e850f5f91012e6f5fb |    | D    | TK  |    | HR | T  | S  | A  |   | H   | EVI |     |
| 5b4292e850f5f91012e6f0a6 |    | D    | TK  |    | HR | T  | S  | A  |   | S   | H   | EVI |
| 5b4292f950f5f91012e714e5 | L  | D    | TK  |    | HR | T  | S  | A  |   | H   | EVI |     |
| 5b4292e850f5f91012e6f19a |    | D    | TK  | L  | HR | T  | S  | A  |   | H   | EVI |     |
| 5b4292e850f5f91012e6f776 | HL | D    | TK  |    | HR | T  | S  | A  |   | H   | EVI |     |
| 5b4292e850f5f91012e6f712 |    | D    | TK  |    | HR | T  | S  | A  |   | H   | EVI |     |
| 5b4292e850f5f91012e6f240 |    | D    | TK  | A  | HR | T  | S  | A  |   | H   | EVI |     |
| 5b4292f950f5f91012e714fb |    | D    | TK  |    | HR | T  | S  | A  |   | H   | EVI |     |
| 5b4292e850f5f91012e6f800 |    | D    | TK  |    | HR | T  | S  | A  |   | HG  | EVI |     |
| 5b4292e850f5f91012e6f0c1 | P  | P    | D   | TK |    | HR | T  | S  | A |     | H   | EVI |
| 5b4292e850f5f91012e6f012 |    | D    | V   | TK |    | HR | T  | S  | A |     | H   | EVI |
| 5b4292e850f5f91012e6f253 |    | D    | TK  |    | HR | T  | S  | A  |   | H   | EVI |     |
| 5b4292f950f5f91012e714bf |    | D    | TK  |    | HR | T  | S  | A  |   | R   | H   | EVI |
| 5b4292e850f5f91012e6f252 |    | D    | TK  | P  | HR | T  | S  | A  |   | H   | EVI |     |
| 5b4292e850f5f91012e6f4db |    | D    | TK  | T  | HR | T  | S  | A  |   | H   | EVI |     |
| 5b4292e850f5f91012e6f79b | A  | D    | TK  |    | HR | T  | S  | A  |   | H   | EVI |     |
| 5b4292e850f5f91012e6f246 |    | D    | TK  | A  | HR | T  | S  | A  |   | H   | EVI |     |
| 5b4292e850f5f91012e6f813 |    | D    | TK  |    | H  | T  | S  | A  |   | H   | EVI |     |
| 5b4292e850f5f91012e6f09e |    | D    | TK  |    | HR | T  | S  | A  |   | H   | EVI |     |
| 5b4292e850f5f91012e6f305 |    | D    | TK  |    | HR | T  | S  | A  |   | G   | H   | EVI |
| 5b4292e850f5f91012e6f06a |    | D    | TK  | Q  | K  | HR | T  | S  | A |     | H   | EVI |
| 5b4292e850f5f91012e6f134 |    | D    | TK  |    | HR | T  | M  | S  | A |     | H   | EVI |
| 5b4292e850f5f91012e6f207 |    | D    | TK  |    | HR | T  | S  | A  |   | H   | EVI |     |
| 5b4292e850f5f91012e6f1d9 |    | D    | TK  | P  | HR | T  | H  | S  | A |     | H   | EVI |
| 5b4292e850f5f91012e6f471 |    | D    | TK  |    | HR | T  | S  | A  |   | H   | EVI |     |
| 5b4292e850f5f91012e6f24c |    | D    | TK  | P  | HR | T  | S  | A  |   | H   | EVI |     |
| 5b4292e850f5f91012e6f4c9 |    | D    | TK  |    | HR | T  | S  | A  |   | H   | EVI |     |
| 5b4292e850f5f91012e6f049 |    | D    | TK  | S  | HR | T  | S  | A  |   | H   | EVI |     |
| 5b4292e850f5f91012e6f329 |    | D    | TK  | H  | HR | T  | S  | A  |   | H   | EVI |     |
| 5b4292f950f5f91012e7157d |    | D    | TK  |    | HR | T  | S  | A  |   | H   | EVI |     |
| 5b4292f950f5f91012e715f3 | H  | D    | TK  |    | HR | T  | S  | A  |   | H   | EVI |     |

|                          |  |   |     |     |     |    |   |   |     |   |   |     |
|--------------------------|--|---|-----|-----|-----|----|---|---|-----|---|---|-----|
| 5b4292e850f5f91012e6f538 |  | D | TK  |     | HR  | T  | S | A |     | H |   | EVI |
| 5b4292e850f5f91012e6f7d8 |  | D | TK  |     | MHR | T  | S | A |     | H |   | EVI |
| 5b4292e850f5f91012e6f32f |  | D | TK  |     | HR  | T  | S | A |     | H |   | EVI |
| 5b4292f950f5f91012e7150c |  | D | TK  |     | HR  | T  | S | A |     | H |   | EVI |
| 5b4292f950f5f91012e716e6 |  | D | TK  |     | HR  | T  | S | A | A   | H |   | EVI |
| 5b4292e850f5f91012e6f32e |  | D | TK  | N   | HR  | T  | S | A |     | H |   | EVI |
| 5b4292f950f5f91012e716f3 |  | D | TK  |     | G   | HR | T | S | A   |   | H | EVI |
| 5b4292f950f5f91012e716e9 |  | D | TK  |     | T   | HR | T | S | A   |   | H | EVI |
| 5b4292e850f5f91012e6f13f |  | D | TK  |     | V   | HR | T | S | A   |   | H | EVI |
| 5b4292e850f5f91012e6efe8 |  | D | TK  |     | S   | HR | T | S | A   |   | H | EVI |
| 5b4292e850f5f91012e6f2e0 |  | D | TK  |     | HR  | T  | S | A |     | H |   | EVI |
| 5b4292f950f5f91012e715d2 |  | D | TK  |     | HR  | T  | S | A |     | H |   | EVI |
| 5b4292e850f5f91012e6f5cd |  | D | STK |     | HR  | T  | S | A |     | H |   | EVI |
| 5b4292e850f5f91012e6efd7 |  | D | TK  | PP  | HR  | T  | S | A |     | H |   | EVI |
| 5b4292e850f5f91012e6f34a |  | D | TK  |     | HR  | T  | S | A | G   |   | H | EVI |
| 5b4292f950f5f91012e715bd |  | D | TK  |     | HR  | T  | S | A |     | H |   | EVI |
| 5b4292f950f5f91012e715a6 |  | D | TK  |     | HR  | T  | S | A |     | H |   | EVI |
| 5b4292e850f5f91012e6f18a |  | D | TK  |     | HR  | T  | L | S | A   |   | H | EVI |
| 5b4292f950f5f91012e714cc |  | D | TK  | P   | HR  | T  | S | A |     | H |   | EVI |
| 5b4292e850f5f91012e6f560 |  | D | TK  |     | HR  | T  | S | A |     | H |   | EVI |
| 5b4292e850f5f91012e6f07d |  | D | TK  | T P | HR  | T  | S | A |     | H |   | EVI |
| 5b4292e850f5f91012e6f5d3 |  | D | TK  |     | HR  | T  | S | A |     | H |   | EVI |
| 5b4292e850f5f91012e6f7ff |  | D | TK  |     | HR  | T  | S | A |     | H |   | EVI |
| 5b4292e850f5f91012e6f846 |  | D | TK  |     | HR  | T  | S | A |     | H |   | EVI |
| 5b4292e850f5f91012e6efa8 |  | D | TK  | A K | HR  | T  | S | A |     | H |   | EVI |
| 5b4292e850f5f91012e6efb1 |  | D | TK  |     | KHR | T  | S | A |     | H |   | EVI |
| 5b4292e850f5f91012e6f571 |  | D | TK  |     | HR  | T  | S | L | A   | V |   | EVI |
| 5b4292f950f5f91012e71678 |  | D | TK  |     | HR  | T  | S | A |     | H |   | EVI |
| 5b4292e850f5f91012e6f759 |  | D | TK  |     | HR  | T  | S | A |     | H |   | EVI |
| 5b4292e850f5f91012e6f010 |  | D | TK  |     | HR  | T  | S | A |     | H |   | EVI |
| 5b4292f950f5f91012e7161d |  | D | TK  |     | N   | HR | T | S | A   |   | H | EVI |
| 5b4292f950f5f91012e716ce |  | D | TKH |     | HR  | T  | S | A |     | H |   | EVI |
| 5b4292f950f5f91012e716bf |  | D | TK  |     | H   | HR | T | S | A   |   | H | EVI |
| 5b4292f950f5f91012e7167e |  | D | TK  |     | HR  | T  | S | A | A   |   | H | EVI |
| 5b4292e850f5f91012e6f087 |  | D | TK  |     | F   | HR | T | S | A   |   | H | EVI |
| 5b4292e850f5f91012e6f4fc |  | D | TK  |     | HR  | T  | S | A |     | H |   | EVI |
| 5b4292f950f5f91012e7168e |  | D | TK  |     | HR  | T  | S | A |     | H |   | EVI |
| 5b4292e850f5f91012e6f480 |  | D | TK  |     | HR  | T  | S | A |     | H |   | EVI |
| 5b4292e850f5f91012e6efde |  | D | TK  | S   | HR  | T  | S | A |     | H |   | EVI |
| 5b4292e850f5f91012e6efbe |  | D | TK  |     | HR  | T  | S | A | M   |   | H | EVI |
| 5b4292e850f5f91012e6f686 |  | D | TKF |     | HR  | T  | Y | A |     | H |   | EVI |
| 5b4292e850f5f91012e6f11b |  | D | TK  |     | HR  | T  | S | A |     | H |   | EVI |
| 5b4292e850f5f91012e6f84a |  | D | TK  |     | A   | HR | T | S | A   |   | H | EVI |
| 5b4292f950f5f91012e715eb |  | D | TK  | F   | HR  | T  | S | Y | A   |   | H | EVI |
| 5b4292f950f5f91012e716b8 |  | D | TK  |     | HR  | T  | S | A |     | H |   | EVI |
| 5b4292e850f5f91012e6f015 |  | D | TK  | R   | HR  | T  | S | A |     | H |   | EVI |
| 5b4292f950f5f91012e71535 |  | D | TK  | L   | HR  | T  | S | A |     | H |   | EVI |
| 5b4292f950f5f91012e716b6 |  | D | TK  |     | HR  | T  | S | A | N   |   | H | EVI |
| 5b4292e850f5f91012e6f52f |  | D | TK  | P   | HR  | T  | S | A |     | H |   | EVI |
| 5b4292e850f5f91012e6f345 |  | D | TK  | P   | HR  | T  | S | A |     | H |   | EVI |
| 5b4292e850f5f91012e6f2b0 |  | D | TK  | Y   | HR  | T  | S | A |     | H |   | EVI |
| 5b4292e850f5f91012e6f4e3 |  | D | TK  |     | HR  | T  | S | A | GSR |   | H | EVI |
| 5b4292e850f5f91012e6f25f |  | D | TK  | P   | HR  | T  | S | A |     | H |   | EVI |
| 5b4292e850f5f91012e6f4cb |  | D | TK  |     | HR  | T  | S | A |     | H |   | EVI |
| 5b4292f950f5f91012e715d1 |  | D | TK  | P   | HR  | T  | S | A |     | H |   | EVI |
| 5b4292f950f5f91012e716ca |  | D | TK  | F   | M   | HR | T | S | A   |   | H | EVI |
| 5b4292e850f5f91012e6f13a |  | D | TK  |     | HR  | T  | S | A | V   |   | H | EVI |
| 5b4292e850f5f91012e6ef84 |  | D | TK  | P   | HR  | T  | S | A |     | H |   | EVI |
| 5b4292e850f5f91012e6f22a |  | D | TK  | M   | HR  | T  | S | A |     | H |   | EVI |
| 5b4292f950f5f91012e7149b |  | D | TK  |     | HR  | T  | S | A |     | H |   | EVI |
| 5b4292e850f5f91012e6f158 |  | D | TK  |     | HR  | T  | S | Q | A   | D |   | EVI |
| 5b4292f950f5f91012e716f0 |  | D | TK  | C   | HR  | T  | S | A |     | H |   | EVI |
| 5b4292e850f5f91012e6f2ce |  | D | TK  |     | HR  | T  | S | A |     | H |   | EVI |
| 5b4292e850f5f91012e6f831 |  | D | TK  | A   | HR  | T  | S | A |     | H |   | EVI |
| 5b4292e850f5f91012e6efa0 |  | D | TK  |     | HR  | T  | S | A | AK  |   | H | EVI |
| 5b4292e850f5f91012e6efa5 |  | D | TK  |     | HR  | T  | S | S | A   |   | H | EVI |
| 5b4292f950f5f91012e71545 |  | D | TK  |     | MHR | T  | S | A |     | H |   | EVI |
| 5b4292e850f5f91012e6f154 |  | D | TK  |     | HR  | T  | S | S | A   |   | H | EVI |
| 5b4292f950f5f91012e71645 |  | D | TK  |     | HR  | T  | S | A |     | H |   | EVI |
| 5b4292f950f5f91012e714c3 |  | D | TK  |     | HR  | T  | S | A | AM  |   | H | EVI |
| 5b4292f950f5f91012e71628 |  | D | TK  | A   | HR  | T  | S | A |     | H |   | EVI |
| 5b4292f950f5f91012e716e8 |  | D | TK  |     | HR  | T  | S | V | A   |   | H | EVI |
| 5b4292e850f5f91012e6f058 |  | D | TK  |     | HR  | T  | S | A | HH  |   | H | EVI |
| 5b4292e850f5f91012e6f014 |  | D | TK  |     | HR  | T  | S | A |     | H |   | EVI |
| 5b4292f950f5f91012e71580 |  | D | TK  |     | HR  | T  | S | A | A   |   | H | EVI |
| 5b4292e850f5f91012e6f784 |  | D | TK  |     | HR  | T  | S | L | A   |   | H | EVI |
| 5b4292e850f5f91012e6efb3 |  | D | TK  |     | HR  | T  | S | A |     | H |   | EVI |
| 5b4292e850f5f91012e6f2b3 |  | D | TK  |     | HR  | T  | H | S | A   |   | H | EVI |
| 5b4292e850f5f91012e6f632 |  | D | TK  |     | HR  | T  | S | A |     | H |   | EVI |
| 5b4292f950f5f91012e71487 |  | D | TK  |     | HR  | T  | S | S | A   |   | H | EVI |
| 5b4292e850f5f91012e6f017 |  | D | TK  |     | HR  | T  | S | A |     | H |   | EVI |
| 5b4292f950f5f91012e71689 |  | D | TK  | Q   | HR  | T  | S | A |     | H |   | EVI |
| 5b4292e850f5f91012e6f0ad |  | D | TK  |     | HR  | T  | S | A |     | H |   | EVI |
| 5b4292e850f5f91012e6f83b |  | D | TK  | G   | HR  | T  | S | A |     | H |   | EVI |
| 5b4292e850f5f91012e6eff7 |  | D | TK  | P   | HR  | T  | G | S | A   |   | H | EVI |
| 5b4292e850f5f91012e6f818 |  | D | TK  | G   | HR  | T  | S | A |     | H |   | EVI |
| 5b4292e850f5f91012e6f2e7 |  | D | TK  |     | HR  | T  | S | A | Q   |   | H | EVI |
| 5b4292f950f5f91012e715f5 |  | D | TK  |     | HR  | T  | S | A |     | H |   | EVI |
| 5b4292e850f5f91012e6f233 |  | D | TK  |     | HR  | T  | S | A |     | H |   | EVI |
| 5b4292e850f5f91012e6f16c |  | D | TK  |     | HR  | T  | S | A |     | H |   | EVI |
| 5b4292f950f5f91012e714fd |  | D | TK  | K   | HR  | T  | S | A |     | H |   | EVI |
| 5b4292e850f5f91012e6f667 |  | D | TK  | H   | HR  | T  | S | A |     | H |   | EVI |
| 5b4292f950f5f91012e714be |  | D | TK  |     | L   | HR | T | S | A   |   | H | EVI |
| 5b4292e850f5f91012e6f0b6 |  | D | TK  |     | HR  | T  | S | A |     | H |   | EVI |
| 5b4292e850f5f91012e6f5cc |  | D | TK  |     | HR  | T  | S | F | A   |   | H | EVI |
| 5b4292e850f5f91012e6f0ef |  | D | TK  |     | HG  | T  | S | A |     | H |   | EVI |
| 5b4292f950f5f91012e71479 |  | D | TK  | T   | HR  | T  | S | A |     | H |   | EVI |
| 5b4292e850f5f91012e6f7fb |  | D | TK  | T   | HR  | T  | S | A |     | H |   | EVI |
| 5b4292e850f5f91012e6f331 |  | D | TK  |     | HR  | T  | S | N | A   |   | H | EVI |
| 5b4292e850f5f91012e6f201 |  | D | TK  |     | HR  | T  | S | A | K   |   | H | EVI |
| 5b4292e850f5f91012e6f045 |  | D | TK  | P   | HR  | T  | S | A |     | H |   | EVI |
| 5b4292e850f5f91012e6f775 |  | D | TK  |     | HR  | T  | S | A |     | H |   | EVI |
| 5b4292f950f5f91012e71489 |  | D | TK  |     | RR  | T  | S | A |     | H |   | EVI |
| 5b4292f950f5f91012e71533 |  | D | TK  |     | HR  | T  | S | A | F   |   | H | EVI |
| 5b4292e850f5f91012e6f311 |  | D | TK  | R   | HR  | T  | S | A |     | H |   | EVI |
| 5b4292f950f5f91012e71486 |  | D | TK  |     | V   | HR | T | S | A   |   | H | EVI |

|                          |      |    |     |       |      |    |    |     |     |
|--------------------------|------|----|-----|-------|------|----|----|-----|-----|
| 5b4292e850f5f91012e6f02  |      | DQ | K   | HR.T  | S    | A  | H  | EVI |     |
| 5b4292e850f5f91012e6f0f2 |      | D  | TK  | HR.T  | S    | A  | H  | EVI | S   |
| 5b4292f950f5f91012e7164b |      | D  | TK  | HR.T  | S    | A  | H  | EVI |     |
| 5b4292e850f5f91012e6f6d6 |      | D  | TK  | HR.T  | S    | V  | A  | EVI |     |
| 5b4292e850f5f91012e6f07c |      | D  | TK  | HR.T  | S    | A  | E  | EVI |     |
| 5b4292e850f5f91012e6f54a | S    | D  | TK  | HR.T  | S    | A  | H  | EVI |     |
| 5b4292f950f5f91012e71467 |      | D  | TK  | HR.T  | S    | A  | H  | EVI |     |
| 5b4292e850f5f91012e6ef8b | P    | P  | D   | PK    | HR.T | S  | A  | EVI |     |
| 5b4292e850f5f91012e6f323 |      | D  | TK  | Q     | HR.T | S  | A  | EVI |     |
| 5b4292e850f5f91012e6f5ff |      | D  | TK  | G     | HR.T | S  | A  | EVI |     |
| 5b4292e850f5f91012e6f24e |      | D  | TK  | HR.T  | S    | D  | H  | EVI |     |
| 5b4292f950f5f91012e716f6 |      | D  | TK  | H     | HR.T | S  | A  | EVI |     |
| 5b4292e850f5f91012e6f231 |      | D  | TK  | HR.T  | S    | A  | HS | EVI |     |
| 5b4292e850f5f91012e6f0ea |      | D  | TK  | HR.T  | S    | A  | H  | EVI | L   |
| 5b4292e850f5f91012e6efd1 |      | D  | TK  | HR.T  | S    | A  | HY | EVI |     |
| 5b4292f950f5f91012e7148a | S    | D  | TK  | HR.T  | S    | A  | H  | EVI |     |
| 5b4292e850f5f91012e6f05b |      | D  | TK  | HR.T  | LS   | A  | H  | EVI |     |
| 5b4292e850f5f91012e6f615 |      | D  | TK  | HR.T  | S    | A  | H  | EVI |     |
| 5b4292e850f5f91012e6f282 |      | D  | TK  | HR.TV | S    | A  | H  | EVI |     |
| 5b4292e850f5f91012e6f4d4 | P    | P  | D   | TK    | HR.T | S  | A  | EVI |     |
| 5b4292e850f5f91012e6f11d |      | D  | TK  | HR.T  | SQ   | A  | H  | EVI |     |
| 5b4292e850f5f91012e6f698 |      | D  | TK  | G     | NR.T | S  | A  | EVI |     |
| 5b4292e850f5f91012e6f12d | P    | D  | TK  | HR.T  | S    | A  | H  | EVI |     |
| 5b4292e850f5f91012e6f293 |      | D  | TK  | HR.T  | TS   | A  | H  | EVI |     |
| 5b4292e850f5f91012e6f7b1 |      | D  | TK  | P     | HR.T | S  | A  | EVI |     |
| 5b4292e850f5f91012e6f0ba |      | D  | TK  | HR.T  | S    | A  | H  | EVI |     |
| 5b4292e850f5f91012e6f01f |      | D  | TK  | HR.T  | S    | A  | H  | EVI |     |
| 5b4292e850f5f91012e6f628 |      | D  | TK  | HR.T  | S    | A  | T  | EVI |     |
| 5b4292e850f5f91012e6f278 |      | D  | TK  | HR.T  | S    | A  | I  | EVI |     |
| 5b4292f950f5f91012e71447 |      | D  | TK  | HR.T  | S    | A  | H  | EVI |     |
| 5b4292e850f5f91012e6f149 |      | D  | TK  | HR.T  | S    | A  | H  | EVI |     |
| 5b4292e850f5f91012e6f7d1 |      | D  | TK  | S     | HR.T | S  | A  | EVI |     |
| 5b4292f950f5f91012e7155d | G    | D  | TK  | HR.T  | S    | A  | H  | EVI |     |
| 5b4292f950f5f91012e71583 |      | D  | TK  | HR.T  | S    | C  | A  | EVI |     |
| 5b4292e850f5f91012e6efa9 |      | D  | TK  | HR.T  | S    | A  | H  | EVI |     |
| 5b4292e850f5f91012e6f6a1 |      | D  | TK  | D     | HR.T | S  | A  | EVI |     |
| 5b4292e850f5f91012e6f736 |      | D  | TK  | HR.T  | S    | A  | H  | EVI |     |
| 5b4292e850f5f91012e6f57d | T    | D  | TK  | HR.T  | S    | A  | H  | EVI |     |
| 5b4292e850f5f91012e6eff4 |      | D  | TK  | HR.T  | S    | A  | H  | EVI |     |
| 5b4292f950f5f91012e7147f | T    | D  | TK  | HR.T  | S    | A  | H  | EVI |     |
| 5b4292f950f5f91012e71476 | P    | D  | TK  | HR.T  | S    | A  | H  | EVI |     |
| 5b4292f950f5f91012e715c9 | L    | D  | TK  | HR.T  | S    | A  | H  | EVI |     |
| 5b4292e850f5f91012e6f67d |      | D  | TK  | HR.T  | S    | T  | A  | EVI |     |
| 5b4292e850f5f91012e6f5a4 | T    | D  | TK  | HR.T  | S    | A  | H  | EVI |     |
| 5b4292f950f5f91012e71515 |      | D  | TK  | HR.T  | S    | V  | A  | EVI |     |
| 5b4292e850f5f91012e6efab |      | D  | TK  | HR.T  | S    | A  | H  | EVI |     |
| 5b4292e850f5f91012e6f1f0 |      | D  | TK  | HR.T  | S    | A  | H  | EVI | V   |
| 5b4292e850f5f91012e6f192 | F    | D  | TK  | HR.T  | S    | A  | H  | EVI |     |
| 5b4292e850f5f91012e6f7fc | W    | D  | TK  | HR.T  | S    | A  | H  | EVI |     |
| 5b4292e850f5f91012e6f295 |      | D  | TK  | HR.T  | L    | S  | A  | EVI |     |
| 5b4292e850f5f91012e6f4b9 | T    | D  | TK  | HR.T  | S    | A  | H  | EVI |     |
| 5b4292f950f5f91012e714c9 |      | D  | TK  | HR.T  | S    | A  | H  | EVI |     |
| 5b4292e850f5f91012e6f540 | A    | D  | TK  | HR.T  | S    | A  | H  | EVI |     |
| 5b4292e850f5f91012e6f330 | L    | D  | TK  | HR.T  | S    | A  | H  | EVI |     |
| 5b4292f950f5f91012e7164d |      | D  | TK  | HR.T  | S    | A  | H  | EVI |     |
| 5b4292e850f5f91012e6f211 |      | D  | TK  | HR.T  | S    | A  | H  | EVI |     |
| 5b4292f950f5f91012e716ac | A    | D  | TK  | HR.T  | S    | A  | H  | EVI |     |
| 5b4292f950f5f91012e716b4 |      | D  | TK  | HR.T  | S    | A  | H  | EVI |     |
| 5b4292f950f5f91012e714ef |      | D  | TK  | HR.T  | S    | A  | H  | EVI |     |
| 5b4292e850f5f91012e6f7b5 |      | D  | TK  | HR.T  | S    | A  | H  | EVI | R   |
| 5b4292f950f5f91012e714c5 |      | D  | TK  | HR.T  | S    | A  | N  | EVI |     |
| 5b4292e850f5f91012e6f104 | A    | D  | TK  | HR.T  | S    | A  | H  | EVI |     |
| 5b4292e850f5f91012e6f621 | R    | D  | TK  | HR.T  | S    | A  | H  | EVI |     |
| 5b4292e850f5f91012e6f709 |      | D  | TK  | HR.T  | S    | A  | H  | EVI |     |
| 5b4292e850f5f91012e6f779 |      | D  | TK  | HR.T  | S    | A  | H  | EVI |     |
| 5b4292e850f5f91012e6f639 |      | D  | TNN | HR.T  | S    | A  | H  | EVI |     |
| 5b4292f950f5f91012e71664 |      | D  | TK  | HR.T  | S    | A  | H  | EVI |     |
| 5b4292e850f5f91012e6f6d5 | Y    | D  | TK  | HR.T  | TS   | A  | H  | EVI |     |
| 5b4292e850f5f91012e6f4c7 |      | D  | TK  | HR.T  | S    | KA | H  | EVI |     |
| 5b4292f950f5f91012e7151f | A    | D  | TK  | HR.T  | S    | A  | H  | EVI |     |
| 5b4292f950f5f91012e7162d |      | D  | TK  | HR.T  | S    | A  | H  | EVI |     |
| 5b4292e850f5f91012e6f1b7 |      | D  | TK  | HR.T  | S    | A  | H  | EVI |     |
| SYELT.PRVA               |      | D  | TK  | HR.T  | S    | A  | H  | EVI |     |
| 5b4292e850f5f91012e6f273 | S    | P  | D   | TK    | HR.T | S  | A  | EVI |     |
| 5b4292e850f5f91012e6f304 |      | D  | TK  | HR.T  | S    | A  | H  | EVI |     |
| 5b4292f950f5f91012e715ec | L    | D  | TK  | HR.T  | S    | A  | H  | EVI |     |
| 5b4292e850f5f91012e6f118 |      | D  | TK  | HR.T  | S    | A  | V  | EVI |     |
| 5b4292f950f5f91012e7166b |      | D  | TK  | HR.T  | S    | A  | H  | EVI |     |
| 5b4292e850f5f91012e6f6e7 |      | D  | TK  | HR.T  | S    | A  | H  | EVI |     |
| 5b4292e850f5f91012e6f0d1 |      | D  | TK  | R     | T    | S  | A  | EVI |     |
| 5b4292e850f5f91012e6f244 |      | D  | TK  | HR.T  | S    | A  | L  | EVI |     |
| 5b4292f950f5f91012e7147b |      | D  | TK  | HR.T  | S    | A  | K  | D   | EVI |
| 5b4292e850f5f91012e6f1ac | T    | D  | TK  | HR.T  | S    | A  | H  | EVI |     |
| 5b4292e850f5f91012e6ef9b |      | D  | TK  | HR.T  | S    | A  | L  | EVI |     |
| 5b4292e850f5f91012e6f2f7 | A    | D  | TK  | HR.T  | S    | A  | H  | EVI |     |
| 5b4292e850f5f91012e6f5ef | Q    | D  | TK  | HR.T  | S    | A  | H  | EVI |     |
| 5b4292e850f5f91012e6f1c1 |      | D  | TK  | HRAT  | S    | A  | H  | EVI |     |
| 5b4292e850f5f91012e6f141 |      | D  | TK  | A     | HR.T | S  | A  | EVI |     |
| 5b4292f950f5f91012e715e0 | T    | D  | TK  | Q     | HR.T | S  | A  | EVI |     |
| 5b4292f950f5f91012e7165d |      | D  | TK  | HR.T  | S    | A  | H  | EVI |     |
| 5b4292e850f5f91012e6f619 | PRVA |    | D   | TK    | HR.T | S  | A  | EVI |     |
| 5b4292e850f5f91012e6f6ac |      | D  | TN  | HR.T  | S    | A  | H  | EVI |     |
| 5b4292f950f5f91012e716d5 |      | D  | TK  | M     | HR.T | S  | A  | EVI |     |
| 5b4292e850f5f91012e6f609 |      | D  | TK  | HR.T  | S    | A  | H  | EVI |     |
| 5b4292e850f5f91012e6f1df |      | D  | TK  | E     | HR.T | S  | A  | EVI |     |
| 5b4292e850f5f91012e6f257 |      | D  | TK  | M     | HR.T | S  | A  | EVI |     |
| 5b4292e850f5f91012e6f66e |      | D  | TKD | HR.T  | S    | A  | H  | EVI |     |
| 5b4292f950f5f91012e71496 |      | D  | TK  | HR.T  | S    | A  | H  | EVI |     |
| 5b4292f950f5f91012e7159e |      | D  | TK  | HR.T  | S    | A  | H  | EVI |     |
| 5b4292f950f5f91012e71616 |      | D  | TK  | HR.T  | S    | A  | H  | EVI |     |
| 5b4292e850f5f91012e6f0d8 |      | D  | TK  | HR.T  | S    | A  | H  | EVI |     |
| 5b4292e850f5f91012e6f63e |      | D  | TK  | HR.T  | S    | A  | A  | EVI |     |
| 5b4292e850f5f91012e6f0e1 |      | D  | TK  | R     | HR.T | S  | A  | EVI |     |
| 5b4292f950f5f91012e71624 |      | D  | TK  | HR.T  | S    | A  | H  | EVI |     |
| 5b4292f950f5f91012e71621 | A    | D  | TK  | HR.T  | S    | A  | H  | EVI |     |
| 5b4292e850f5f91012e6f1e9 |      | D  | TK  | HR.T  | S    | A  | H  | EVI |     |

|                          |    |   |   |    |    |    |    |   |   |    |   |   |   |     |
|--------------------------|----|---|---|----|----|----|----|---|---|----|---|---|---|-----|
| 5b4292f950f5f91012e715dd | -- |   | D | TK |    | HR | T  | S | F | A  |   | H |   | EVI |
| 5b4292e850f5f91012e6f6a8 | -- |   | D | TK |    | HR | T  | S |   | A  |   | H |   | EVI |
| 5b4292e850f5f91012e6f235 | -- |   | P | P  | D  | TK |    | S |   | A  |   | H |   | EVI |
| 5b4292e850f5f91012e6f2fd | -- |   |   |    |    | HR | T  | S |   | A  |   | H |   | EVI |
| 5b4292e850f5f91012e6efbd | -- |   |   |    | D  | TK |    | S |   | A  |   | H |   | EVI |
| 5b4292e850f5f91012e6f4a9 | -- |   |   |    | D  | TK | V  | S |   | A  |   | H |   | EVI |
| 5b4292e850f5f91012e6f5c9 | -- |   |   |    | D  | TK |    | S |   | A  |   | H |   | EVI |
| 5b4292f950f5f91012e714d1 | -- | F |   |    | D  | TK |    | S |   | A  |   | H |   | EVI |
| 5b4292e850f5f91012e6f68b | -- |   |   |    | D  | TK |    | S |   | AA |   | H |   | EVI |
| 5b4292e850f5f91012e6f503 | -- |   |   |    | D  | TK |    | S |   | A  |   | H |   | EVI |
| 5b4292e850f5f91012e6efc3 | -- |   |   |    | D  | TK |    | S |   | A  |   | E | H | EVI |
| 5b4292e850f5f91012e6f09c | -- |   | P | P  | D  | TK |    | S |   | A  |   | H |   | EVI |
| 5b4292e850f5f91012e6f026 | -- |   |   |    | D  | TK |    | S |   | A  |   | H |   | EVI |
| 5b4292f950f5f91012e716ba | -- |   |   |    | D  | TK |    | S |   | A  |   | H |   | EVI |
| 5b4292e850f5f91012e6f545 | -- |   | R |    | D  | TK |    | S |   | A  |   | H |   | EVI |
| 5b4292e850f5f91012e6f750 | -- |   |   |    | ED | TK |    | S |   | A  |   | H |   | EVI |
| 5b4292e850f5f91012e6f1c0 | -- |   |   |    | Y  | D  | TK |   | S |    | A |   | H | EVI |
| 5b4292f950f5f91012e714c1 | -- |   |   |    | D  | TK |    | S |   | A  |   | H |   | EVI |
