# Supplementary material for: Diverse patterns of antibody variable gene repertoire disruption in patients with amyloid light chain (AL) amyloidosis
Source: PubMed Central journal article supplement (PMC7340310; doi:10.1371/journal.pone.0235713), 2020-07-07
Supplement: pone.0235713.s007.pdf [file pone.0235713.s007.pdf]

|                           | 1                                                                                                           | 20 | 30 | 40 | 50 | 60 | 70 | 80 | 90 | 100 | 110 |   |      |
|---------------------------|-------------------------------------------------------------------------------------------------------------|----|----|----|----|----|----|----|----|-----|-----|---|------|
|                           | AM3                                                                                                         |    |    |    |    |    |    |    |    |     |     |   |      |
|                           | QSVLTQPPSASGTPGQORVITSCSGSSNNIGSNVYVYQQLPGTAPKLLIYRNNORPSGVPDRFSGSKSGTASLAISGLRSEADADYCAAWDDSLSGIVFGTGTQVTL |    |    |    |    |    |    |    |    |     |     |   |      |
| 5b4292f850f5f91012e7121f  | A                                                                                                           | I  |    | HF | A  | N  | H  | L  | A  | F   | G   | I | FR1  |
| 5b42931150f5f91012e738a8  | A                                                                                                           | I  |    | HF | A  | N  | H  | A  | A  | F   | G   | I | CDR1 |
| 5b42931350f5f91012e73e2f  | A                                                                                                           | I  |    | HF | A  | N  | H  | A  | F  | D   | G   | I | FR2  |
| 5b42931350f5f91012e74500  | A                                                                                                           | I  |    | HF | A  | N  | H  | A  | F  |     | G   | I | CDR2 |
| 5b4292f850f5f91012e7135b  | A                                                                                                           | I  |    | HF | A  | N  | H  | A  | F  |     | G   | I | FR3  |
| 5b42931150f5f91012e7368d  | A                                                                                                           | I  |    | HF | A  | N  | H  | A  | F  |     | G   | I | CDR3 |
| 5b42931350f5f91012e74063  | A                                                                                                           | I  |    | HF | A  | N  | H  | A  | F  |     | G   | I | FR4  |
| 5b42931150f5f91012e73811  |                                                                                                             |    |    | T  | D  | F  |    | H  | S  | D   | A   | F | I    |
| 5b42931350f5f91012e74541  | A                                                                                                           | I  |    | HF | A  | LN | H  | A  | F  |     | G   | I | I    |
| 5b42931150f5f91012e737fd  | A                                                                                                           | I  |    | HF | A  | N  | H  | A  | F  |     | G   | I | I    |
| 5b42931150f5f91012e732e8  | L                                                                                                           | A  | I  | HF | A  | N  | H  | A  | F  |     | G   | I | I    |
| 5b4292f850f5f91012e70c2a  | A                                                                                                           | I  |    | HF | A  | I  | H  | A  | F  |     | G   | I | I    |
| 5b42931350f5f91012e74502  | A                                                                                                           | I  |    | HF | A  | N  | H  | A  | F  |     | G   | I | I    |
| 5b42931150f5f91012e73b02  | I                                                                                                           | A  | I  | HF | A  | N  | H  | A  | F  |     | G   | I | I    |
| 5b42931350f5f91012e74406  | A                                                                                                           | I  |    | HF | A  | N  | H  | A  | F  |     | G   | I | I    |
| 5b42931350f5f91012e73db6  | -----                                                                                                       | A  | I  | HF | A  | N  | H  | A  | F  |     | G   | I | I    |
| 5b4292f850f5f91012e70bf3  | A                                                                                                           | I  |    | HF | A  | N  | H  | A  | F  |     | G   | I | I    |
| 5b4292f850f5f91012e70cab  | A                                                                                                           | I  |    | HF | A  | N  | H  | A  | F  | G   | G   | I | I    |
| 5b42931350f5f91012e73daa  | A                                                                                                           | I  |    | HF | A  | N  | H  | A  | V  | F   | G   | I | I    |
| 5b42931350f5f91012e73ff9  | A                                                                                                           | I  |    | R  | H  | F  | A  | N  | H  | A   | F   | G | I    |
| 5b4292f850f5f91012e70d40  | A                                                                                                           | I  |    | R  | H  | F  | A  | N  | H  | A   | F   | G | I    |
| 5b4292f850f5f91012e70dbd  | A                                                                                                           | I  |    | HF | A  | N  | H  | FA | F  |     | G   | I | I    |
| 5b42931350f5f91012e74313  | V                                                                                                           | A  | I  | HF | A  | N  | H  | A  | F  |     | G   | I | I    |
| 5b42931350f5f91012e7474d  | A                                                                                                           | I  |    | HF | A  | N  | H  | R  | A  | F   | G   | I | I    |
| 5b42931150f5f91012e73bbb  | A                                                                                                           | I  |    | H  | F  | S  | A  | N  | H  | A   | F   | G | I    |
| 5b42931150f5f91012e73717  | A                                                                                                           | I  |    | HF | A  | N  | H  | C  | A  | F   | G   | I | I    |
| 5b42931350f5f91012e73dad8 | A                                                                                                           | I  |    | HF | A  | N  | H  | A  | F  |     | G   | I | I    |
| 5b42931350f5f91012e73d81  | A                                                                                                           | I  |    | HF | A  | N  | H  | AA | F  |     | G   | I | I    |
| 5b42931350f5f91012e741ca  | A                                                                                                           | I  |    | HF | A  | N  | H  | A  | F  |     | G   | I | I    |
| 5b42931350f5f91012e7459f  | A                                                                                                           | I  |    | HF | A  | N  | H  | A  | F  |     | G   | I | I    |
| 5b42931350f5f91012e74120  | A                                                                                                           | I  |    | HF | A  | N  | H  | A  | F  |     | G   | I | IA   |
| 5b42931350f5f91012e744d6  | A                                                                                                           | I  |    | H  | HF | A  | N  | H  | A  | F   | G   | I | I    |
| 5b42931150f5f91012e7382e  | A                                                                                                           | I  |    | HF | A  | N  | H  | L  | A  | F   | G   | I | I    |
| 5b42931350f5f91012e740f7  | P                                                                                                           | A  | I  | HF | A  | N  | H  | A  | N  | F   | G   | I | I    |
| 5b4292f850f5f91012e70c5e  | P                                                                                                           | A  | I  | HF | A  | N  | H  | A  | F  |     | G   | I | I    |
| 5b42931350f5f91012e746ed  | A                                                                                                           | I  |    | HF | A  | N  | H  | A  | F  |     | G   | I | I    |
| 5b42931350f5f91012e74560  | A                                                                                                           | I  |    | HF | A  | N  | H  | A  | F  |     | G   | I | I    |
| 5b4292f850f5f91012e70e3a  | A                                                                                                           | I  |    | HF | A  | N  | H  | A  | F  |     | G   | I | I    |
| 5b4292f850f5f91012e71248  | A                                                                                                           | I  |    | HF | A  | N  | H  | A  | F  |     | G   | I | I    |
| 5b42931350f5f91012e742f0  | A                                                                                                           | I  |    | HF | A  | N  | H  | S  | F  |     | G   | I | I    |
| 5b4292f750f5f91012e70ba3  | A                                                                                                           | I  |    | HF | A  | N  | H  | A  | FP |     | G   | I | I    |
| 5b4292f850f5f91012e70f54  | A                                                                                                           | I  |    | HF | A  | N  | H  | A  | F  |     | G   | I | S    |
| 5b4292f850f5f91012e712a1  | A                                                                                                           | I  |    | HF | A  | N  | H  | A  | F  |     | G   | I | I    |
| 5b42931350f5f91012e7454b  | A                                                                                                           | I  |    | HF | A  | N  | H  | A  | V  | F   | G   | I | I    |
| 5b4292f850f5f91012e70f43  | A                                                                                                           | I  |    | HF | A  | N  | H  | A  | F  |     | G   | I | I    |
| 5b4292f850f5f91012e70d6a  | A                                                                                                           | I  |    | HF | A  | N  | H  | A  | Q  | F   | G   | I | I    |
| 5b42931350f5f91012e73e09  | A                                                                                                           | I  |    | HF | A  | N  | H  | A  | F  |     | G   | I | I    |
| 5b42931150f5f91012e73b22  | A                                                                                                           | I  |    | A  | T  | H  |    | AA | F  |     | G   | I | I    |
| 5b42931350f5f91012e7434a  | M                                                                                                           | A  | I  | HF | A  | N  | H  | A  | F  |     | G   | I | I    |
| 5b4292f850f5f91012e70f98  | A                                                                                                           | I  |    | HF | A  | N  | H  | A  | A  | F   | G   | I | I    |
| 5b42931150f5f91012e73916  | N                                                                                                           | A  | I  | HF | A  | N  | H  | A  | F  |     | G   | I | I    |
| 5b42931350f5f91012e73f5e  | A                                                                                                           | I  |    | HF | A  | N  | H  | A  | F  |     | G   | I | I    |
| 5b4292f850f5f91012e70c07  | A                                                                                                           | I  |    | HF | A  | N  | H  | A  | F  |     | G   | I | I    |
| 5b42931350f5f91012e745d3  | A                                                                                                           | I  |    | HF | A  | N  | LH | A  | F  |     | G   | I | I    |
| 5b42931350f5f91012e73f00  | A                                                                                                           | I  |    | HF | A  | N  | H  | A  | F  |     | G   | I | I    |
| 5b42931350f5f91012e74323  | A                                                                                                           | I  |    | HF | A  | N  | H  | A  | F  |     | G   | I | I    |
| 5b4292f850f5f91012e70e9a  | A                                                                                                           | I  |    | HF | A  | N  | P  | H  | A  | F   | G   | I | I    |
| 5b4292f850f5f91012e70e45  | A                                                                                                           | I  |    | HF | A  | N  | H  | A  | F  |     | G   | I | I    |
| 5b42931150f5f91012e7376e  | -----                                                                                                       | A  | I  | HF | A  | N  | H  | A  | F  |     | G   | I | I    |
| 5b4292f850f5f91012e71305  | A                                                                                                           | I  |    | HF | A  | N  | H  | A  | S  | F   | G   | I | I    |
| 5b4292f850f5f91012e70d16  | A                                                                                                           | I  |    | HF | A  | N  | H  | A  | F  |     | G   | I | I    |
| 5b42931350f5f91012e74164  | A                                                                                                           | I  |    | HF | A  | N  | H  | A  | F  |     | G   | I | I    |
| 5b4292f850f5f91012e70fb7  | A                                                                                                           | I  |    | HF | A  | N  | H  | A  | F  |     | G   | I | I    |
| 5b42931350f5f91012e740e7  | A                                                                                                           | I  |    | HF | A  | N  | H  | A  | F  |     | G   | I | I    |
| 5b42931350f5f91012e7442d  | A                                                                                                           | I  |    | HF | A  | N  | H  | A  | F  |     | G   | I | I    |
| 5b4292f850f5f91012e7128c  | A                                                                                                           | K  | I  | HF | A  | N  | H  | A  | F  |     | G   | I | I    |
| 5b42931350f5f91012e73e8a  | A                                                                                                           | I  |    | HF | A  | N  | H  | A  | F  | Y   | G   | I | I    |
| 5b4292f750f5f91012e70bd5  | A                                                                                                           | I  |    | HF | V  | N  | H  | A  | F  |     | G   | I | I    |
| 5b4292f850f5f91012e712e9  | A                                                                                                           | I  |    | HF | A  | N  | H  | A  | F  |     | G   | I | I    |
| 5b42931350f5f91012e742c9  | GGI                                                                                                         | A  | I  | HF | A  | N  | H  | A  | F  |     | G   | I | I    |
| 5b42931350f5f91012e73f20  | A                                                                                                           | I  |    | HF | A  | N  | H  | A  | F  |     | G   | I | I    |
| 5b4292f850f5f91012e70ebc  | A                                                                                                           | I  |    | HF | A  | N  | H  | A  | F  |     | G   | I | I    |
| 5b4292f850f5f91012e711e8  | A                                                                                                           | I  |    | HF | A  | N  | H  | A  | F  |     | G   | I | I    |
| 5b4292f850f5f91012e71364  | A                                                                                                           | I  |    | HF | A  | N  | H  | A  | F  |     | G   | I | I    |
| 5b42931150f5f91012e739c3  | A                                                                                                           | I  |    | HF | A  | N  | H  | G  | A  | F   | G   | I | I    |
| 5b42931350f5f91012e746da  | A                                                                                                           | I  |    | HF | A  | N  | H  | A  | F  |     | G   | I | I    |
| 5b4292f850f5f91012e70f6f  | A                                                                                                           | I  |    | HF | A  | N  | H  | D  | A  | F   | G   | I | I    |
| 5b42931350f5f91012e73ede  | A                                                                                                           | I  |    | HF | A  | N  | H  | A  | F  |     | G   | I | I    |
| 5b42931350f5f91012e74544  | A                                                                                                           | I  |    | HF | A  | N  | H  | A  | F  |     | G   | I | I    |
| 5b4292f850f5f91012e70dde  | A                                                                                                           | I  |    | HF | A  | N  | H  | A  | F  |     | G   | I | I    |
| 5b42931350f5f91012e744b8  | A                                                                                                           | I  |    | HF | A  | N  | H  | A  | F  |     | G   | I | I    |
| 5b42931350f5f91012e74542  | A                                                                                                           | I  |    | HF | A  | N  | H  | A  | F  |     | G   | I | I    |
| 5b42931150f5f91012e73780  | A                                                                                                           | P  | A  | HF | A  | N  | H  | A  | F  |     | G   | I | I    |
| 5b42931350f5f91012e744b5  | A                                                                                                           | I  |    | HF | A  | N  | H  | PA | F  |     | G   | I | I    |
| 5b4292f850f5f91012e70e8b  | -----                                                                                                       | A  | I  | HF | A  | N  | H  | A  | F  |     | G   | I | I    |
| 5b42931350f5f91012e741db  | A                                                                                                           | I  |    | HF | A  | N  | H  | A  | F  |     | G   | I | I    |
| 5b42931350f5f91012e74111  | A                                                                                                           | I  |    | HF | A  | N  | H  | A  | F  |     | G   | I | I    |
| 5b42931350f5f91012e74089  | A                                                                                                           | I  |    | HF | E  | N  | H  | A  | F  |     | G   | I | I    |
| 5b42931150f5f91012e739b9  | A                                                                                                           | I  |    | HF | A  | N  | H  | A  | F  | D   | G   | I | I    |
| 5b42931350f5f91012e74256  | AN                                                                                                          | I  |    | HF | A  | N  | H  | A  | F  |     | G   | I | I    |
| 5b42931150f5f91012e734e6  | A                                                                                                           | I  |    | HF | A  | N  | H  | A  | F  |     | G   | I | II   |
| 5b42931350f5f91012e743f4  | A                                                                                                           | I  |    | C  | HF | A  | N  | H  | A  | F   | G   | I | I    |
| 5b4292f850f5f91012e70e03  | P                                                                                                           | A  | I  | HF | A  | N  | H  | A  | F  |     | G   | I | I    |
| 5b42931350f5f91012e73eb1  | A                                                                                                           | I  |    | HF | A  | N  | H  | A  | F  |     | G   | I | I    |
| 5b42931150f5f91012e7346b  | G                                                                                                           | A  | I  | HF | A  | N  | H  | A  | F  |     | G   | I | I    |
| 5b42931350f5f91012e74092  | A                                                                                                           | I  |    | H  | F  | Q  | A  | N  | H  | A   | F   | G | I    |
| 5b42931350f5f91012e7446f  | A                                                                                                           | I  |    | H  | F  | L  | A  | N  | H  | A   | F   | G | I    |
| 5b4292f850f5f91012e71174  | A                                                                                                           | I  |    | HF | A  | N  | H  | A  | Y  | F   | G   | I | I    |
| 5b4292f850f5f91012e70bfe  | A                                                                                                           | I  |    | HF | A  | N  | H  | A  | F  |     | G   | I | I    |
| 5b4292f850f5f91012e71338  | A                                                                                                           | I  |    | HF | A  | N  | H  | A  | L  | F   | G   | I | I    |
| 5b4292f750f5f91012e70bbc  | A                                                                                                           | I  |    | HF | A  | N  | H  | A  | F  | Q   | G   | I | I    |
| 5b42931350f5f91012e7401e  | A                                                                                                           | I  |    | HF | A  | N  | H  | A  | F  |     | G   | I | I    |
| 5b42931350f5f91012e73da9  | -----                                                                                                       | A  | I  | HF | A  | N  | H  | A  | F  |     | G   | I | I    |

5b42931350f5f91012e7404b A I HF A N H A F W G I  
5b42931350f5f91012e73e1c A I HF A N H AF F G I  
5b42931350f5f91012e73dca A I HF A N H A F G I  
5b42931350f5f91012e73d86 A I HF AV N H A F G I  
5b42931350f5f91012e744cf A I HF A N H A F G I  
5b4292f850f5f91012e71238 A I HF A N H A F G I  
5b42931350f5f91012e742d2 K A I HF A N H YA A F G I  
5b4292f850f5f91012e711e9 A I HF A N HS A F G I  
5b4292f850f5f91012e70cb2 A I HF A N H A F G L I  
5b42931150f5f91012e7359d A I HF A N H A VF G I  
5b42931350f5f91012e7453c A I HF A N H A F D G I  
5b4292f850f5f91012e70fd3 A I HF A NI H A F G I  
5b4292f850f5f91012e7109e A I HF A N F H A F G I  
5b42931150f5f91012e736b9 A I HF A N H I A F G I  
5b4292f850f5f91012e7128a A I HF A N H A L G I  
5b4292f750f5f91012e70bbe A I HF A N H A F V G I  
5b42931350f5f91012e7455f H A I HF A N H A F G I  
5b42931150f5f91012e73c13 A I HFL A N H W A F G I  
5b42931150f5f91012e736f2 A I HF A N H A F G I  
5b42931350f5f91012e73fae A I HF A N H A F G I  
5b4292f850f5f91012e7129a A I HF A N H A F ED G I  
5b42931150f5f91012e7336b A I HF A N H A F G I  
5b42931350f5f91012e743d6 A I HF A N H A F G I  
5b4292f850f5f91012e71343 A I HF A N H A F G I  
5b4292f850f5f91012e70c67 A I HF A N H A F H G I  
5b42931350f5f91012e74495 A I HF A N H CA F G I  
5b42931150f5f91012e737e1 A I HF A N H A FT G I  
5b4292f850f5f91012e710bd T A I HF A N H A F G I  
5b42931350f5f91012e741fe A I HF A N H A F G I  
5b42931350f5f91012e74608 A I HF A N H A F G I  
5b4292f850f5f91012e70f2c A I H A N H A F G I  
5b42931150f5f91012e73440 A I HF A N H A F G I  
5b42931150f5f91012e73435 A I HF A N H A F H G I  
5b4292f850f5f91012e70e01 A I HF A N H DA F G I  
5b42931150f5f91012e73a1f A I HF A N H A FT G I  
5b4292f850f5f91012e710af PHF A N H A F G I  
5b4292f850f5f91012e70e28 A I HF A N H A F G I  
5b42931150f5f91012e7381b A N H A F G I  
5b4292f850f5f91012e70db9 A I HF A N H A F G I  
5b4292f850f5f91012e70ff5 A I HF A N H H A F G I  
5b4292f850f5f91012e710bc A I HF A N H A F G I  
5b42931350f5f91012e74597 A I KHf A N H A F G I  
5b4292f850f5f91012e70ea3 A I HF A N HS A F G I  
5b42931350f5f91012e7465f A I HF A N H A FE E G I  
5b42931150f5f91012e7364a A I HF A N H A FE EDI G I  
5b42931350f5f91012e7430c A I HF A N H A FE G I  
5b4292f850f5f91012e70c11 S A I HF A N H A FE G I  
5b4292f850f5f91012e70d1c F A I HF A N H A FE G I  
5b42931350f5f91012e73e65 A I HF A N H A FE G I  
5b42931150f5f91012e735f6 A I HF A N H A FE G I  
5b42931350f5f91012e73e31 A I HF A N Q A FE G I  
5b4292f850f5f91012e7106a A I HF A N H A FE G I  
5b42931350f5f91012e7460f A I HF A N H A FE S G I  
5b4292f850f5f91012e70dc3 I A I HF A N H A FE G I  
5b42931350f5f91012e73eb3 A I HF A N H A FE G I  
5b42931350f5f91012e74288 E A I HF A N H A FE G I  
5b4292f850f5f91012e70d7f A I HF A N H A FE G I  
5b42931150f5f91012e738d8 A I HF A N H A FE G I  
5b42931350f5f91012e73fb7 A A I HF A N H A FE G I  
5b4292f850f5f91012e70d1e A I HF A N H A FE G I  
5b4292f750f5f91012e70b99 A I HF A N H A FE G I  
5b4292f850f5f91012e70d77 A I HF A N H H A FE G I  
5b42931150f5f91012e73ae9 A IT HF A N H A FE G I  
5b42931150f5f91012e736af A I HF A N H A FE H G I  
5b42931350f5f91012e740f8 Y A I HF A N H A FE G I  
5b42931150f5f91012e73650 A I HF A N H A FE G I  
5b4292f850f5f91012e71368 A I HF A N H A FE V G I  
5b42931350f5f91012e73df2 A I HF A N N A FE G I  
5b42931350f5f91012e7414c A A I HF A N H A FE G I  
5b42931150f5f91012e739ec A I HF A N H T A FE G I  
5b42931350f5f91012e742aa A I HF A N H A FE G I  
5b4292f850f5f91012e71043 A I HF A N H A FE S G I  
5b42931350f5f91012e745a6 EA A I HF A N H A FE G I  
5b42931150f5f91012e733f5 K A I HF A N H A FE G I  
5b4292f850f5f91012e70cccd A I HF AD N H A FE G I  
5b42931150f5f91012e7349a A I HF A N H A FE G I  
5b42931150f5f91012e73670 A I HF A N H AP A FE G I  
5b42931150f5f91012e73a14 Y A I HF A N H A FE G I  
5b42931350f5f91012e74556 A I HF A N H A FE G I  
5b42931150f5f91012e73a98 A I HF A N R H A FE G I  
5b4292f850f5f91012e710cd A I HF A N H A FE G I  
5b42931350f5f91012e73dd4 A I HF A NP H A FE G S I  
5b42931350f5f91012e74048 A I HF A N H A T A FE G I  
5b42931350f5f91012e742e3 A I HF A N H A FE G I  
5b4292f850f5f91012e71125 K A I HF A N H A FE G I  
5b4292f850f5f91012e71312 A I HF A N H A FE G I  
5b42931350f5f91012e743b9 S A I HF A N H A FE G I  
5b42931150f5f91012e73901 A I HF A N H A FE G I  
5b42931350f5f91012e74527 L A I HF A N H A FE G I  
5b4292f850f5f91012e70bf6 A I HF A N H A FE G I  
5b42931150f5f91012e73366 A I HF A N H A FE G I  
5b42931150f5f91012e7368b A I HF A T H A FE G I  
5b42931350f5f91012e73de5 A I C HF A N H A FE G I  
5b4292f850f5f91012e70e1a A I HF A N H A FE G I  
5b42931350f5f91012e73fd4 R A I HF A N H A FE G I  
5b42931350f5f91012e744f4 A I HF A N H A FE G I  
5b4292f850f5f91012e70eb2 A I HF A N H A FE G I  
5b42931350f5f91012e746bd A I HF A N H LA F G I  
5b42931350f5f91012e7404f A I HF A N H A FE G I  
5b42931150f5f91012e732fc A I HF A N H A FE G I  
5b42931350f5f91012e7467b D I HF A N H A FE G I  
5b42931150f5f91012e737f8 A I HF A N H A FE G I  
5b42931350f5f91012e73ff4 A I HF A N H V A FE G I  
5b4292f850f5f91012e7111d A I HF A N R A FE G I  
5b4292f850f5f91012e71050 A I HF A N H A FE G I  
5b42931150f5f91012e73754 A I HF A N H A FE G I

|                          |    |    |     |    |    |    |    |     |    |    |   |
|--------------------------|----|----|-----|----|----|----|----|-----|----|----|---|
| 5b4292f850f5f91012e712b8 | A  | I  | HF  | A  | N  | H  | A  | F   | G  | I  |   |
| 5b4292f850f5f91012e7104c | A  | I  | HF  | A  | N  | H  | A  | F   | G  | S  | I |
| 5b42931150f5f91012e73977 | A  | I  | HF  | A  | N  | H  | A  | F   | G  | I  |   |
| 5b42931150f5f91012e735a8 | H  | GI | S   | N  | H  | R  | N  | DR  | A  | F  | I |
| 5b42931350f5f91012e742b8 | A  | I  | HF  | A  | N  | H  | A  | F   | G  | I  |   |
| 5b4292f850f5f91012e71230 | A  | I  | HF  | A  | N  | H  | A  | F   | G  | I  |   |
| 5b4292f850f5f91012e70c21 | A  | I  | HF  | A  | N  | H  | A  | F   | G  | I  |   |
| 5b42931350f5f91012e73ff2 | A  | I  | HF  | A  | N  | H  | A  | F   | G  | I  |   |
| 5b4292f850f5f91012e70d96 | P  | A  | I   | HF | A  | N  | H  | A   | F  | I  |   |
| 5b4292f850f5f91012e70c9a | P  | A  | I   | HF | A  | N  | H  | A   | F  | N  | I |
| 5b4292f750f5f91012e70bc8 | P  | A  | I   | HF | A  | N  | H  | A   | F  | I  |   |
| 5b42931150f5f91012e73bf3 | I  | A  | I   | HF | A  | N  | H  | A   | F  | I  |   |
| 5b42931350f5f91012e7459c | A  | I  | HF  | A  | N  | H  | S  | A   | F  | I  |   |
| 5b42931350f5f91012e7433e | A  | I  | HF  | A  | N  | H  | A  | F   | G  | I  |   |
| 5b4292f850f5f91012e70f7d | A  | I  | HF  | A  | TN | H  | A  | F   | G  | I  |   |
| 5b4292f850f5f91012e71138 | P  | A  | I   | HF | A  | N  | H  | A   | F  | I  |   |
| 5b42931150f5f91012e735fe | A  | I  | HF  | A  | N  | H  | A  | F   | G  | I  |   |
| 5b42931350f5f91012e74536 | T  | A  | I   | HF | A  | N  | H  | A   | F  | I  |   |
| 5b4292f850f5f91012e70ef1 | A  | I  | HF  | A  | N  | H  | A  | F   | G  | I  |   |
| 5b42931150f5f91012e73456 | A  | ID | HF  | A  | N  | H  | A  | F   | G  | I  |   |
| 5b42931150f5f91012e735db | M  | L  | P   | D  | V  | D  | R  | F   | G  | I  |   |
| 5b42931350f5f91012e746af | A  | I  | HF  | A  | N  | H  | A  | Y   | G  | I  |   |
| 5b4292f850f5f91012e71011 | A  | I  | HF  | A  | N  | H  | AA | F   | G  | I  |   |
| 5b4292f850f5f91012e7100d | T  | A  | I   | HF | A  | N  | H  | A   | F  | I  |   |
| 5b42931150f5f91012e7377a | A  | I  | HF  | A  | N  | H  | A  | F   | G  | I  |   |
| 5b4292f850f5f91012e71329 | A  | I  | HF  | A  | N  | H  | A  | F   | I  |    |   |
| 5b4292f850f5f91012e70d41 | A  | I  | HF  | A  | N  | H  | A  | F   | C  | I  |   |
| 5b42931350f5f91012e73da7 | A  | I  | HF  | A  | N  | H  | A  | A   | F  | I  |   |
| 5b42931150f5f91012e737f7 | A  | I  | HF  | A  | N  | H  | A  | F   | G  | W  | I |
| 5b42931150f5f91012e73aa9 | A  | I  | HF  | A  | N  | H  | A  | F   | G  | I  |   |
| 5b42931150f5f91012e7357d | A  | I  | HF  | A  | N  | H  | A  | F   | G  | I  |   |
| 5b42931150f5f91012e7385d | A  | I  | HF  | A  | N  | H  | A  | F   | G  | FI | I |
| 5b42931350f5f91012e74090 | A  | I  | HF  | A  | N  | H  | A  | F   | G  | I  |   |
| 5b42931150f5f91012e7366f | L  | A  | I   | HF | A  | N  | H  | A   | F  | I  |   |
| 5b42931350f5f91012e743a7 | A  | I  | HF  | A  | N  | I  | H  | A   | F  | I  |   |
| 5b42931150f5f91012e734a3 | A  | I  | HF  | A  | N  | H  | A  | F   | I  |    |   |
| 5b42931150f5f91012e73731 | A  | I  | HF  | A  | N  | H  | A  | F   | G  | I  |   |
| 5b42931350f5f91012e74641 | AT | I  | HF  | A  | N  | TH | A  | F   | G  | I  |   |
| 5b42931350f5f91012e74126 | A  | I  | HF  | A  | N  | H  | A  | F   | G  | I  |   |
| 5b42931150f5f91012e73448 | A  | I  | HF  | A  | N  | H  | AA | F   | T  | I  |   |
| 5b42931350f5f91012e7431c | A  | I  | HF  | A  | N  | H  | T  | A   | F  | I  |   |
| 5b42931150f5f91012e73b37 | A  | I  | HF  | A  | N  | H  | A  | F   | G  | I  |   |
| 5b42931150f5f91012e732ee | A  | I  | HF  | A  | N  | H  | A  | F   | VN | I  |   |
| 5b42931350f5f91012e746ca | S  | A  | I   | HF | A  | N  | H  | A   | F  | I  |   |
| 5b4292f850f5f91012e70d11 | A  | I  | HF  | G  | N  | H  | A  | F   | G  | S  | I |
| 5b42931150f5f91012e739d6 | A  | I  | HF  | A  | N  | H  | A  | F   | G  | I  |   |
| 5b4292f850f5f91012e70f38 | A  | I  | HF  | A  | N  | H  | A  | F   | G  | I  |   |
| 5b4292f850f5f91012e70d4c | A  | I  | HF  | A  | N  | H  | A  | F   | G  | R  | I |
| 5b42931150f5f91012e73460 | A  | I  | NF  | A  | N  | H  | A  | F   | G  | I  |   |
| 5b4292f850f5f91012e70f60 | A  | I  | HF  | A  | N  | H  | A  | F   | G  | I  |   |
| 5b42931350f5f91012e74274 | P  | A  | I   | HF | A  | N  | H  | A   | F  | I  |   |
| 5b42931350f5f91012e73e39 | Q  | A  | I   | HF | A  | N  | H  | A   | F  | I  |   |
| 5b42931350f5f91012e745bf | A  | I  | HF  | A  | N  | H  | A  | F   | R  | I  |   |
| 5b42931350f5f91012e745c9 | A  | I  | HF  | A  | N  | H  | A  | F   | G  | I  |   |
| 5b4292f850f5f91012e711c3 | A  | I  | HF  | A  | N  | H  | A  | F   | T  | I  |   |
| 5b42931350f5f91012e7420c | A  | I  | HF  | A  | N  | H  | A  | F   | G  | I  |   |
| 5b42931350f5f91012e746ea | A  | I  | HF  | A  | N  | H  | A  | F   | I  |    |   |
| 5b42931350f5f91012e73f5b | A  | I  | HF  | A  | N  | H  | A  | F   | G  | I  |   |
| 5b42931150f5f91012e73ae2 | A  | I  | HF  | A  | N  | H  | A  | F   | G  | I  |   |
| 5b42931150f5f91012e73630 | A  | I  | HF  | A  | N  | H  | AA | F   | G  | I  |   |
| 5b42931350f5f91012e73d8d | A  | I  | HF  | A  | N  | H  | AA | F   | G  | I  |   |
| 5b42931350f5f91012e73d4c | A  | I  | HF  | A  | N  | H  | A  | FM  | G  | I  |   |
| 5b4292f850f5f91012e70e3b | A  | I  | HF  | A  | N  | H  | A  | F   | M  | I  |   |
| 5b42931350f5f91012e73e22 | A  | P  | I   | HF | A  | N  | H  | A   | F  | I  |   |
| 5b42931350f5f91012e73e89 | R  | A  | I   | HF | A  | N  | H  | A   | F  | I  |   |
| 5b42931150f5f91012e73a06 | F  | A  | I   | HF | A  | N  | H  | A   | F  | I  |   |
| 5b42931350f5f91012e742d4 | A  | I  | HF  | A  | N  | H  | A  | F   | G  | I  |   |
| 5b42931150f5f91012e7333a | A  | I  | HF  | A  | N  | H  | A  | F   | G  | I  |   |
| 5b4292f850f5f91012e71300 | V  | A  | I   | HF | A  | N  | H  | A   | F  | I  |   |
| 5b42931150f5f91012e737a4 | A  | I  | HF  | A  | N  | H  | A  | F   | G  | I  |   |
| 5b42931350f5f91012e74422 | A  | I  | HF  | A  | N  | H  | A  | F   | G  | I  |   |
| 5b4292f850f5f91012e70e61 | A  | I  | HF  | A  | N  | HK | A  | F   | G  | I  |   |
| 5b4292f850f5f91012e7102a | A  | I  | HF  | A  | N  | H  | A  | F   | G  | I  |   |
| 5b42931350f5f91012e73e67 | A  | I  | HF  | A  | N  | H  | A  | F   | G  | I  |   |
| 5b4292f850f5f91012e712f7 | A  | I  | HF  | AG | N  | H  | A  | F   | G  | I  |   |
| 5b4292f850f5f91012e70efd | A  | I  | HF  | A  | N  | H  | AY | F   | G  | I  |   |
| 5b42931350f5f91012e73fec | A  | I  | F   | A  | N  | H  | A  | F   | G  | I  |   |
| 5b4292f850f5f91012e71013 | A  | I  | HF  | A  | N  | H  | N  | A   | F  | I  |   |
| 5b42931150f5f91012e73a81 | M  | A  | I   | HF | A  | N  | H  | A   | F  | I  |   |
| 5b4292f850f5f91012e70c65 | A  | I  | HF  | A  | N  | H  | A  | F   | I  |    |   |
| 5b42931150f5f91012e735a6 | A  | I  | HF  | A  | N  | H  | A  | E   | F  | I  |   |
| 5b4292f750f5f91012e70b87 | A  | I  | HF  | A  | N  | H  | W  | A   | F  | I  |   |
| 5b42931350f5f91012e74045 | A  | I  | HF  | A  | N  | H  | A  | F   | G  | I  |   |
| 5b42931350f5f91012e73dda | A  | I  | HF  | S  | N  | H  | A  | F   | G  | I  |   |
| 5b42931350f5f91012e745f0 | A  | I  | HF  | A  | N  | HG | A  | F   | G  | I  |   |
| 5b4292f850f5f91012e70c50 | A  | I  | HF  | A  | N  | H  | A  | F   | V  | I  |   |
| 5b42931350f5f91012e7403f | A  | I  | HF  | A  | N  | H  | A  | P   | F  | I  |   |
| 5b42931350f5f91012e746fc | A  | I  | HF  | A  | N  | H  | E  | A   | F  | G  | I |
| 5b42931350f5f91012e7414e | A  | I  | HF  | A  | N  | H  | A  | F   | G  | I  |   |
| 5b42931350f5f91012e740b6 | A  | I  | HF  | A  | N  | H  | A  | F   | K  | I  |   |
| 5b4292f850f5f91012e70ea7 | A  | I  | HF  | A  | N  | H  | A  | DF  | G  | I  |   |
| 5b4292f850f5f91012e71361 | A  | I  | HF  | A  | N  | H  | A  | F   | G  | I  |   |
| 5b42931350f5f91012e74029 | H  | A  | I   | HF | A  | N  | H  | A   | F  | I  |   |
| 5b42931350f5f91012e73ee4 | L  | A  | I   | HF | A  | N  | H  | A   | F  | G  | I |
| 5b42931350f5f91012e73fbd | A  | I  | HF  | A  | N  | H  | AA | F   | G  | V  | I |
| 5b42931350f5f91012e74247 | A  | I  | HF  | A  | N  | H  | A  | RKS | V  | I  |   |
| 5b42931150f5f91012e73548 | A  | I  | HF  | A  | N  | H  | A  | F   | G  | I  |   |
| 5b42931350f5f91012e7417c | A  | I  | HF  | A  | N  | H  | A  | F   | G  | N  | I |
| 5b42931350f5f91012e742b3 | A  | I  | HF  | A  | N  | H  | A  | SF  | G  | I  |   |
| 5b42931350f5f91012e73efe | A  | I  | HF  | A  | N  | H  | A  | P   | G  | I  |   |
| 5b42931350f5f91012e744ad | P  | A  | I   | HF | A  | N  | H  | A   | F  | I  |   |
| 5b4292f850f5f91012e70bf5 | A  | I  | HF  | A  | SN | H  | A  | F   | G  | I  |   |
| 5b4292f850f5f91012e71357 | A  | I  | HFQ | A  | N  | H  | A  | F   | G  | I  |   |
| 5b4292f850f5f91012e70e46 | A  | I  | HF  | A  | N  | H  | A  | F   | G  | I  |   |
| 5b42931350f5f91012e7429c | A  | I  | HF  | A  | N  | H  | Q  | A   | F  | I  |   |
| 5b42931350f5f91012e7462c | A  | I  | HF  | A  | NV | H  | A  | F   | G  | I  |   |

|                          |    |   |     |    |   |   |    |   |   |   |   |
|--------------------------|----|---|-----|----|---|---|----|---|---|---|---|
| 5b42931350f5f91012e74389 | A  | I | HF  | A  | N | H | A  | F | K | G | I |
| 5b42931350f5f91012e74280 | A  | I | HF  | A  | N | H | A  | F |   | G | I |
| 5b42931350f5f91012e740ad | A  | I | HFT | A  | N | H | A  | F |   | G | I |
| 5b42931350f5f91012e73e79 | A  | I | HF  | A  | N | H | A  | F |   | G | I |
| 5b4292f850f5f91012e712db | P  | A | I   | HF | A | N | H  | A | F |   | G |
| 5b42931350f5f91012e74360 | A  | I | HF  | A  | N | H | A  | F |   | G | R |
| 5b42931350f5f91012e742a4 | A  | I | HF  | A  | N | H | A  | F |   | G | I |
| 5b4292f850f5f91012e70e29 | A  | I | A   | HF | A | N | H  | A | F |   | G |
| 5b42931350f5f91012e73f99 | A  | I | HF  | AV | N | H | A  | F |   | G | I |
| 5b42931350f5f91012e7405b | A  | I | YF  | A  | N | H | A  | F |   | G | I |
| 5b42931150f5f91012e737e2 | A  | I | HF  | A  | N | H | A  | F |   | G | I |
| 5b42931350f5f91012e741e7 | A  | I | HF  | A  | N | H | A  | F | V |   | G |
| 5b42931350f5f91012e741ef | T  | A | I   | HF | A | N | H  | A | F |   | G |
| 5b4292f850f5f91012e70d74 | A  | I | HF  | A  | N | H | A  | F | E |   | G |
| 5b42931150f5f91012e734fd | A  | I | HF  | A  | N | H | A  | F | R |   | G |
| 5b42931350f5f91012e73eed | A  | I | HF  | A  | N | H | A  | F |   | G | I |
| 5b4292f850f5f91012e710ec | A  | I | HF  | A  | N | H | A  | T | F |   | G |
| 5b42931350f5f91012e74488 | A  | I | HF  | G  | N | H | A  | F |   | G | I |
| 5b42931350f5f91012e74506 | A  | I | F   | HF | A | N | H  | A | F |   | G |
| 5b42931150f5f91012e736ba | A  | I |     |    |   |   | A  | F |   | G | I |
| 5b42931350f5f91012e742f3 | A  | I | HF  | A  | N | H | A  | F |   | G | I |
| 5b42931350f5f91012e73ac6 | A  | I | HF  | A  | N | H | FA | F |   | G | I |
| 5b42931350f5f91012e73df5 | AR | I | HF  | A  | N | H | A  | F |   | G | I |
| 5b42931350f5f91012e73fe3 | A  | I | HF  | A  | N | H | A  | F | K |   | G |
