# Supplementary material for: Diverse patterns of antibody variable gene repertoire disruption in patients with amyloid light chain (AL) amyloidosis
Source: PubMed Central journal article supplement (PMC7340310; doi:10.1371/journal.pone.0235713), 2020-07-07
Supplement: pone.0235713.s009.pdf [file pone.0235713.s009.pdf]

|                          |   |    |   |   |    |    |   |    |    |    |   |   |     |     |     |   |   |   |
|--------------------------|---|----|---|---|----|----|---|----|----|----|---|---|-----|-----|-----|---|---|---|
| 5b4297f650f5f91012e7659a |   | D  | H | D |    | T  | W | PD | D  |    | T | F | ITN | L   | S   | R |   |   |
| 5b4297f650f5f91012e76688 |   | D  | H | D | Y  | D  |   |    |    |    | T | F | ITN | L   | S   | R |   |   |
| 5b4297f650f5f91012e76761 |   | D  | H | D |    | D  |   |    |    |    | T | F | ITN | L   | S   | R |   |   |
| 5b4297f650f5f91012e7675f | P | D  | H | D |    | D  |   |    |    |    | T | F | ITN | L   | S   | R |   |   |
| 5b4297f650f5f91012e765bb |   | D  | H | D |    | D  |   |    |    |    | T | F | ITN | L   | S   | R |   |   |
| 5b4297f650f5f91012e7666c |   | I  | D | H | D  |    |   |    |    |    | T | F | ITN | L   | S   | R |   |   |
| 5b4297f650f5f91012e76617 |   | D  | H | D |    | D  |   |    |    |    | T | F | ITN | L   | S   | R |   |   |
| 5b4297f650f5f91012e7678a |   | D  | H | D |    | D  |   |    |    |    | T | F | ITN | L   | S   | R |   |   |
| 5b4297f650f5f91012e76757 |   | L  | D | H | D  |    |   |    |    |    | T | F | ITN | L   | S   | R |   |   |
| 5b4297f650f5f91012e765e0 | A | D  | H | D |    | D  |   |    |    |    | T | F | ITN | L   | S   | R |   |   |
| 5b4297f650f5f91012e76707 |   | D  | H | D |    | D  |   |    |    |    | T | F | ITN | L   | S   | R |   |   |
| 5b4297f650f5f91012e76754 |   | S  | L | D |    | G  | K |    |    |    | T | F | ITN | L   | S   | R |   |   |
| 5b4297f650f5f91012e765d6 |   | I  | D | H | D  |    |   |    |    |    | T | F | ITN | L   | S   | R |   |   |
| 5b4297f650f5f91012e766cf |   | D  | H | D |    | D  |   |    |    |    | T | F | ITN | L   | S   | R |   |   |
| 5b4297f650f5f91012e765d7 | A | D  | H | D |    | D  |   |    |    |    | T | F | ITN | L   | S   | R |   |   |
| 5b4297f650f5f91012e765dd |   | D  | H | D |    | D  |   |    |    |    | T | F | ITN | L   | S   | R |   |   |
| 5b4297f650f5f91012e767b9 |   | D  | H | D |    | D  |   |    |    |    | T | F | ITN | L   | S   | R |   |   |
| 5b4297f650f5f91012e7673f |   | D  | H | D |    | D  |   |    |    |    | T | F | ITN | L   | S   | R |   |   |
| 5b4297f650f5f91012e76586 |   | D  | H | D |    | D  |   |    |    |    | T | F | ITN | L   | S   | R |   |   |
| 5b4297f650f5f91012e76718 |   | R  | D | H | D  |    |   |    |    |    | T | F | ITN | L   | S   | R |   |   |
| 5b4297f650f5f91012e76594 |   | D  | H | D |    | D  |   |    |    |    | T | F | ITN | L   | S   | R |   |   |
| 5b4297f650f5f91012e7665e |   | D  | H | D | H  | D  |   |    |    |    | T | F | ITN | L   | S   | R |   |   |
| 5b4297f650f5f91012e7674e |   | D  | H | D |    | D  |   |    |    |    | T | F | ITN | L   | S   | R |   |   |
| 5b4297f650f5f91012e76791 |   | D  | H | L | D  |    |   |    |    |    | T | F | ITN | L   | S   | R |   |   |
| 5b4297f650f5f91012e766c6 |   | D  | H | D |    | T  | W | PD | A  | D  |   | T | F   | ITN | L   | S | R |   |
| 5b4297f650f5f91012e765e1 |   | D  | H | D |    | D  |   |    |    |    | T | F | ITN | L   | S   | R |   |   |
| 5b4297f650f5f91012e7658d |   | L  | D | H | D  |    |   |    |    |    | T | F | ITN | L   | S   | R |   |   |
| 5b4297f650f5f91012e76583 |   | F  | D | H | D  |    |   |    |    |    | T | F | ITN | L   | S   | R |   |   |
| 5b4297f650f5f91012e76654 |   | D  | H | D |    | D  |   |    |    |    | T | F | ITN | L   | S   | R |   |   |
| 5b4297f650f5f91012e766f9 |   | D  | H | D |    | D  |   |    |    |    | T | F | ITN | L   | S   | R |   |   |
| 5b4297f650f5f91012e766d2 |   | D  | H | P | D  |    |   |    |    |    | T | F | ITN | L   | S   | R |   |   |
| 5b4297f650f5f91012e766a6 |   | D  | H | D |    | D  |   |    |    |    | T | F | ITN | L   | S   | R |   |   |
| 5b4297f650f5f91012e76691 |   | D  | H | D |    | D  |   |    |    |    | T | F | ITN | L   | S   | R |   |   |
| 5b4297f650f5f91012e76603 |   | D  | H | D |    | D  |   |    |    |    | T | F | ITN | L   | S   | R |   |   |
| 5b4297f650f5f91012e7658b |   | D  | H | D |    | D  |   |    |    |    | T | F | ITN | L   | S   | R |   |   |
| 5b4297f650f5f91012e7670a |   | D  | H | D |    | D  |   |    |    |    | T | F | ITN | L   | S   | R |   |   |
| 5b4297f650f5f91012e76664 |   | D  | H | D |    | D  |   |    |    |    | T | F | ITN | L   | S   | R |   |   |
| 5b4297f650f5f91012e7666f |   | D  | H | D |    | D  |   |    |    |    | T | F | ITN | L   | S   | R |   |   |
| 5b4297f650f5f91012e766b8 |   | D  | H | D |    | D  |   |    |    |    | T | F | ITN | L   | S   | R |   |   |
| 5b4297f650f5f91012e766c0 |   | D  | H | D | N  | D  |   |    |    |    | T | F | ITN | L   | S   | R |   |   |
| 5b4297f650f5f91012e767ba |   | D  | H | D |    | D  |   |    |    |    | T | F | ITN | L   | S   | R |   |   |
| 5b4297f650f5f91012e766e4 |   | D  | H | D | R  | D  |   |    |    |    | T | F | ITN | L   | S   | R |   |   |
| 5b4297f650f5f91012e76672 |   | D  | H | D |    | D  |   | W  | PA | D  |   | T | F   | ITN | L   | S | R |   |
| 5b4297f650f5f91012e76679 |   | D  | H | D |    | D  |   |    |    | AD |   | T | F   | ITN | L   | S | R |   |
| 5b4297f650f5f91012e7669c |   | D  | H | D |    | D  |   |    |    |    | T | F | ITN | L   | S   | R |   |   |
| 5b4297f650f5f91012e7671f | Y | D  | H | D |    | D  |   |    |    |    | T | F | ITN | L   | S   | R |   |   |
| 5b4297f650f5f91012e767b2 |   | D  | H | D |    | D  |   |    |    |    | T | F | ITN | L   | S   | R |   |   |
| 5b4297f650f5f91012e766d1 |   | D  | H | D |    | D  |   |    |    |    | T | F | ITN | L   | S   | R |   |   |
| 5b4297f650f5f91012e76636 |   | D  | H | D |    | D  |   |    |    | DK |   | T | F   | ITN | L   | S | R |   |
| 5b4297f650f5f91012e7674f |   | D  | H | D |    | D  |   |    |    | T  |   | T | F   | ITN | L   | S | R |   |
| 5b4297f650f5f91012e766da |   | D  | H | D |    | D  |   |    |    |    |   | T | F   | ITN | L   | S | R |   |
| 5b4297f650f5f91012e76637 | A | D  | H | D |    | D  |   |    |    |    |   | T | F   | ITN | L   | S | R |   |
| 5b4297f650f5f91012e7664a |   | D  | H | D |    | D  |   |    |    |    |   | T | F   | ITN | L   | S | R |   |
| 5b4297f650f5f91012e7668b |   | D  | H | D |    | D  |   |    |    | N  |   | T | F   | ITN | L   | S | R |   |
| 5b4297f650f5f91012e76770 |   | D  | H | D |    | D  |   |    |    |    |   | T | F   | ITN | L   | S | R |   |
| 5b4297f650f5f91012e76621 |   | D  | H | D |    | D  |   |    |    |    |   | T | F   | ITN | L   | S | R |   |
| 5b4297f650f5f91012e76622 |   | D  | H | D |    | D  |   |    |    |    |   | T | F   | ITN | L   | S | R |   |
| 5b4297f650f5f91012e767ad |   | D  | H | D |    | D  |   |    |    |    |   | T | F   | ITN | L   | S | R |   |
| 5b4297f650f5f91012e7665d |   | D  | H | D |    | D  |   |    |    |    |   | T | F   | ITN | L   | S | R |   |
| 5b4297f650f5f91012e76685 |   | D  | H | D |    | D  |   |    |    |    |   | T | F   | ITN | L   | S | R |   |
| 5b4297f650f5f91012e766ca |   | P  | D | H | D  |    |   |    |    |    |   | T | F   | ITN | L   | S | R |   |
| 5b4297f650f5f91012e766f0 |   | LP | D | H | D  |    |   |    |    |    |   | T | F   | ITN | L   | S | R |   |
| 5b4297f650f5f91012e76708 |   | D  | H | D |    | D  |   |    |    |    |   | T | F   | ITN | L   | S | R |   |
| 5b4297f650f5f91012e76792 |   | D  | H | D |    | D  |   |    |    |    |   | T | F   | ITN | L   | S | R |   |
| 5b4297f650f5f91012e766c3 |   | D  | H | D |    | D  |   |    |    |    | M |   | T   | F   | ITN | L | S | R |
| 5b4297f650f5f91012e765ff |   | D  | H | D |    | D  |   |    |    |    |   | T | F   | ITN | L   | S | R |   |
| 5b4297f650f5f91012e7677b |   | D  | H | D |    | D  |   |    |    |    |   | T | F   | ITN | L   | S | R |   |
| 5b4297f650f5f91012e76732 |   | D  | H | D |    | D  |   |    |    |    |   | T | F   | ITN | L   | S | R |   |
| 5b4297f650f5f91012e765e4 |   | D  | H | D |    | D  |   |    |    |    | A |   | T   | F   | ITN | L | S | R |
| 5b4297f650f5f91012e765e2 |   | D  | H | D |    | D  |   |    |    |    |   | T | F   | ITN | L   | S | R |   |
| 5b4297f650f5f91012e76660 |   | Y  | D | H | D  |    |   |    |    |    |   | T | F   | ITN | L   | S | R |   |
| 5b4297f650f5f91012e76658 |   | P  | L | D | H  | D  |   |    |    |    |   | T | F   | ITN | L   | S | R |   |
| 5b4297f650f5f91012e7673a |   |    |   |   |    | NP |   |    |    |    |   | T | F   | ITN | L   | S | R |   |
| 5b4297f650f5f91012e76781 |   | D  | H | D |    | D  |   |    |    |    |   | T | F   | ITN | L   | S | R |   |
| 5b4297f650f5f91012e7672a |   | D  | H | D |    | D  |   |    |    |    |   | T | F   | ITN | L   | S | R |   |
| 5b4297f650f5f91012e7664b |   | Y  | D | H | D  |    |   |    |    |    |   | T | F   | ITN | L   | S | R |   |
| 5b4297f650f5f91012e7663f |   | D  | H | D |    | D  |   |    |    |    |   | T | F   | ITN | L   | S | R |   |
| 5b4297f650f5f91012e7665c |   | D  | H | D |    | D  |   |    |    |    |   | T | F   | ITN | L   | S | R |   |
| 5b4297f650f5f91012e76723 |   | D  | H | D |    | D  |   |    |    |    | V |   | T   | F   | ITN | L | S | R |
| 5b4297f650f5f91012e7664e |   | D  | H | D |    | D  |   |    |    |    |   | T | F   | ITN | L   | S | R |   |
| 5b4297f650f5f91012e76613 |   | D  | H | D |    | D  |   |    |    |    |   | T | F   | ITN | L   | S | R |   |
| 5b4297f650f5f91012e766c7 |   | D  | H | D |    | D  |   |    |    |    |   | T | F   | ITN | L   | S | R |   |
| 5b4297f650f5f91012e76680 |   | D  | H | D |    | D  |   |    |    |    |   | T | F   | ITN | L   | S | R |   |
| 5b4297f650f5f91012e76748 |   | D  | H | D |    | D  |   |    |    |    |   | T | F   | ITN | L   | S | R |   |
| 5b4297f650f5f91012e7674a |   | D  | H | D |    | D  |   |    |    |    |   | T | F   | ITN | L   | S | R |   |
| 5b4297f650f5f91012e7672c |   | F  | D | H | D  |    |   |    |    |    |   | T | F   | ITN | L   | S | R |   |
| 5b4297f650f5f91012e765b7 |   | D  | H | D |    | D  |   |    |    |    |   | T | F   | ITN | L   | S | R |   |
| 5b4297f650f5f91012e766c1 |   | D  | H | D |    | D  |   |    |    |    |   | T | F   | ITN | L   | S | R |   |
| 5b4297f650f5f91012e76743 |   | H  | D | H | D  |    |   |    |    |    |   | T | F   | ITN | L   | S | R |   |
| 5b4297f650f5f91012e76742 |   | D  | H | D |    | D  |   |    |    |    |   | T | F   | ITN | L   | S | R |   |
| 5b4297f650f5f91012e76733 |   | D  | H | D |    | D  |   |    |    |    |   | T | F   | ITN | L   | S | R |   |
| 5b4297f650f5f91012e76749 |   | P  | D | H | D  |    |   |    |    |    |   | T | F   | ITN | L   | S | R |   |
| 5b4297f650f5f91012e76588 |   | D  | H | D | DN | D  |   |    |    |    |   | T | F   | ITN | L   | S | R |   |
| 5b4297f650f5f91012e76716 |   | D  | H | D |    | D  |   |    |    |    |   | T | F   | ITN | L   | S | R |   |
| 5b4297f650f5f91012e76714 |   | D  | H | D |    | D  |   |    |    |    |   | T | F   | ITN | L   | S | R |   |
| 5b4297f650f5f91012e7676b |   | N  | D | H | D  |    |   |    |    |    |   | T | F   | ITN | L   | S | R |   |
| 5b4297f650f5f91012e765cf |   | D  | H | D |    | D  |   |    |    |    |   | T | F   | ITN | L   | S | R |   |
| 5b4297f650f5f91012e7674c |   | D  | H | D |    | D  |   |    |    |    |   | T | F   | ITN | L   | S | R |   |
| 5b4297f650f5f91012e76704 |   | D  | H | D |    | D  |   |    |    |    |   | T | F   | ITN | L   | S | R |   |
| 5b4297f650f5f91012e7677f |   | T  | D | H | D  |    |   |    |    |    |   | T | F   | ITN | L   | S | R |   |
| 5b4297f650f5f91012e7661d |   | D  | H | D |    | D  |   |    |    |    |   | T | F   | ITN | L   | S | R |   |
| 5b4297f650f5f91012e76611 |   | D  | H | D |    | D  |   |    |    |    |   | T | F   | ITN | L   | S | R |   |
| 5b4297f650f5f91012e7679f |   | D  | H | D |    | D  |   |    |    |    |   | T | F   | ITN | L   | S | R |   |
| 5b4297f650f5f91012e76706 |   | D  | H | D |    | D  |   |    |    |    |   | T | F   | ITN | L   | S | R |   |
| 5b4297f650f5f91012e76624 |   | D  | H | D |    | D  |   |    |    |    |   | T | F   | ITN | L   | S | R |   |
| 5b4297f650f5f91012e76623 |   | D  | H | D |    | D  |   |    |    |    |   | T | F   | ITN | L   | S | R |   |
| 5b4297f650f5f91012e765b4 |   | D  | H | D |    | D  |   |    |    |    |   | T | F   | ITN | L   | S | R |   |
| 5b4297f650f5f91012e76794 |   | H  | D | H | D  |    |   |    |    |    |   | T | F   | ITN | L   | S | R |   |
| 5b4297f650f5f91012e76612 |   | D  | H | D |    | D  |   |    |    |    |   | T | F   | ITN | L   | S | R |   |
| 5b4297f650f5f91012e76726 |   | D  | H | D |    | D  |   |    |    |    |   |   |     |     |     |   |   |   |

5b4297f650f5f91012e7659b D H D T W PD D T F ITN-L S R  
5b4297f650f5f91012e76693 D H D T W PD Y D T F ITN-L S R  
5b4297f650f5f91012e766d4 CD H D D T W PD D T F ITN-L S R  
5b4297f650f5f91012e765b2 D H D T W PD D T F ITN-L S R  
5b4297f650f5f91012e76795 D H D T W PD R D T F ITN-L S R  
5b4297f650f5f91012e765c5 D H D T W PD FD D T F ITN-L S R  
5b4297f650f5f91012e7663a D H D T W PD D T F ITN-L S R  
5b4297f650f5f91012e765bc D H D T W PD D S T F ITN-L S R  
5b4297f650f5f91012e76709 D H D T W PD D T F ITN-L S R  
5b4297f650f5f91012e767b5 D H D DT W PD D T F ITN-L S R  
5b4297f650f5f91012e765a0 D H D T W PD D T F ITN-L S R  
5b4297f650f5f91012e765a1 D H D T W PD F D T F ITN-L S R  
5b4297f650f5f91012e7658a D H D T W PD D T F FY ITN-L S R  
5b4297f650f5f91012e767b8 D H D M T W PD D T F ITN-L S R  
5b4297f650f5f91012e7671e D H D T W PD D KT F ITN-L S R  
5b4297f650f5f91012e766bf D H D E T W PD D T F ITN-L S R  
5b4297f650f5f91012e766c9 D H D T W PD D T L ITN-L S R  
5b4297f650f5f91012e766e9 E D H D H T W PD D T F ITN-L S R  
5b4297f650f5f91012e7657a V H D T W PD D T F ITN-L S R  
5b4297f650f5f91012e765d5 I A K T W PD D T F ITN-L S R  
5b4297f650f5f91012e76649 D H D T W PD D T F ITN-L S R  
5b4297f650f5f91012e766fb D H D T W PD D E T F ITN-L S R  
5b4297f650f5f91012e76765 E D H D T W PD D T F ITN-L S R  
5b4297f650f5f91012e767f2 D H D T W PD D T F ITN-L S R  
5b4297f650f5f91012e76788 A D H D T W PD D T F ITN-L S R  
5b4297f650f5f91012e76736 D H D T W PD D T F ITN-L S R  
5b4297f650f5f91012e76786 D H D T W PDC D T F ITN-L S R  
5b4297f650f5f91012e7672d D H D T W PD D T F ITN-L S R  
5b4297f650f5f91012e7667e DDH D D T W PD D T F ITN-L S R  
5b4297f650f5f91012e767a3 D H H D T W PD D T F ITN-L S R  
5b4297f650f5f91012e76650 P D H D T W PD D T F ITN-L S R  
5b4297f650f5f91012e7671d D H D T W PD D T F ITN-L S R  
5b4297f650f5f91012e767b0 P D H D T W PD D T F ITN-L S R  
5b4297f650f5f91012e7676c S L G K D T F ITN-L S R  
5b4297f650f5f91012e76591 M D H D T W PD D T F ITN-L S R  
5b4297f650f5f91012e765f6 D H D T W PD D T F ITN-L S R  
5b4297f650f5f91012e76641 D H D T W PD D T F ITN-L S R  
5b4297f650f5f91012e766f1 D H QD T W PD D T F ITN-L S R  
5b4297f650f5f91012e766e5 D H DV T W PD D T F ITN-L S R  
5b4297f650f5f91012e7673d D H D T W PD D T F ITN-L S R  
5b4297f650f5f91012e7661a D H D T W PD D T F ITN-L S R  
5b4297f650f5f91012e76787 D H D T W PD D T F ITN-L S R  
5b4297f650f5f91012e76681 D H D T W PD D T F ITN-L S R  
5b4297f650f5f91012e76687 D H D T W PD D T F ITN-L S R  
5b4297f650f5f91012e766ad D H D T W PD D T F ITN-L S R  
5b4297f650f5f91012e7675c L D H D T W PD D T F ITN-L S R  
5b4297f650f5f91012e766d7 D H D T W PD D T F ITN-L S R  
5b4297f650f5f91012e76667 D H D T W PD D T F ITN-L S R I
