# Supplementary material for: Diverse patterns of antibody variable gene repertoire disruption in patients with amyloid light chain (AL) amyloidosis
Source: PubMed Central journal article supplement (PMC7340310; doi:10.1371/journal.pone.0235713), 2020-07-07
Supplement: pone.0235713.s010.pdf [file pone.0235713.s010.pdf]

|                          | 1                                                                                                         | 20  | 30  | 40  | 50 | 60 | 70 | 80 | 90 | 100 |      |
|--------------------------|-----------------------------------------------------------------------------------------------------------|-----|-----|-----|----|----|----|----|----|-----|------|
|                          | EIVLTQSPGTLSPGERATLSCRASQSVSSSYLAWYQOKPGQAPRLLIYGASSRATGIPDRFSGSGSGTDFTLTISRLEPEDFAVYCCOYQSSPLTFGGGTKVEIK |     |     |     |    |    |    |    |    |     |      |
| 5b42931150f5f91012e73052 | G.N                                                                                                       | TI  | N.T | F   | S  | T  | N  | M  | T  |     | FR1  |
| 5b42931150f5f91012e73161 | G.N                                                                                                       | TI  | N.T | F   | S  | YT | N  | M  | T  |     | FR2  |
| 5b42931150f5f91012e733cb | G.N                                                                                                       | TI  | N.T | F   | S  | T  | N  | M  | T  |     | CDR1 |
| 5b42931150f5f91012e7303a | G.N                                                                                                       | TI  | N.T | F   | D  | S  | Q  | T  | N  | M   | FR2  |
| 5b42931150f5f91012e73019 | GN                                                                                                        | TI  | N.T | F   | S  | T  | N  | M  | T  |     | FR2  |
| 5b42931150f5f91012e73327 | G.N                                                                                                       | TI  | N.T | F   | T  | S  | T  | N  | M  | T   | CDR2 |
| 5b42931150f5f91012e73072 | G.N                                                                                                       | TI  | N.T | F   | S  | T  | N  | M  | T  |     | FR3  |
| 5b42931150f5f91012e73234 | G.N                                                                                                       | TI  | N.T | F   | S  | V  | T  | N  | M  | T   | FR3  |
| 5b42931150f5f91012e7309f | R                                                                                                         | G.N | TI  | N.T | F  | S  | T  | N  | M  | T   | CDR3 |
| 5b42931150f5f91012e7324b | G.N                                                                                                       | TI  | N.T | F   | F  | S  | T  | N  | M  | T   | FR4  |
| 5b42931150f5f91012e72fdd | G.N                                                                                                       | TI  | N.T | F   | S  | T  | N  | M  | T  |     | FR4  |
| 5b42931150f5f91012e731ef | G.N                                                                                                       | TI  | N.T | F   | D  | S  | T  | N  | M  | T   |      |
| 5b42931150f5f91012e72e37 | I                                                                                                         | G.N | TI  | N.T | F  | S  | T  | N  | M  | T   | I    |
| 5b42931150f5f91012e72fd1 | G.N                                                                                                       | TI  | N.T | F   | S  | T  | I  | N  | M  | T   | I    |
| 5b42931150f5f91012e72eed | G.N                                                                                                       | TI  | N.T | F   | G  | S  | T  | N  | M  | T   | I    |
| 5b42931150f5f91012e72f20 | G.N                                                                                                       | TI  | N.T | F   | S  | T  | N  | M  | T  |     | I    |
| 5b42931150f5f91012e7305a | G.N                                                                                                       | TI  | N.T | F   | S  | T  | N  | M  | T  | Y   | I    |
| 5b42931150f5f91012e7337d | G.N                                                                                                       | AI  | N.T | F   | S  | T  | N  | M  | T  |     | I    |
| 5b42931150f5f91012e72eb4 | G.N                                                                                                       | TI  | N.T | F   | S  | T  | N  | M  | T  |     | I    |
| 5b42931150f5f91012e72f68 | G.N                                                                                                       | TI  | N.T | F   | S  | T  | N  | M  | T  |     | I    |
| 5b42931150f5f91012e730d8 | I                                                                                                         | A   | V   | N   | NN | T  | T  | N  | M  | T   | V    |
| 5b42931150f5f91012e733d1 | G.N                                                                                                       | TI  | N.T | F   | S  | T  | N  | M  | T  |     | V    |
| 5b42931150f5f91012e72f5c | G.N                                                                                                       | TT  | N.T | F   | S  | T  | N  | M  | T  |     | V    |
| 5b42931150f5f91012e73166 | G.N                                                                                                       | TI  | N.T | F   | S  | T  | N  | M  | T  |     | V    |
| 5b42931150f5f91012e731c0 | G.N                                                                                                       | TI  | N.T | VF  | S  | T  | N  | M  | T  |     | V    |
| 5b42931150f5f91012e73168 | R                                                                                                         | G.N | TI  | N.T | F  | S  | T  | N  | M  | T   | V    |
| 5b42931150f5f91012e73077 | G.N                                                                                                       | TI  | N.T | F   | S  | T  | N  | M  | T  |     | V    |
| 5b42931150f5f91012e730b2 | G.N                                                                                                       | TI  | N.T | K   | F  | S  | T  | N  | M  | T   | V    |
| 5b42931150f5f91012e72f6b | G.N                                                                                                       | TI  | N.T | F   | H  | S  | T  | N  | M  | T   | V    |
| 5b42931150f5f91012e733ed | G.N                                                                                                       | TI  | N.T | F   | S  | T  | N  | M  | T  |     | V    |
| 5b42931150f5f91012e730d9 | G.N                                                                                                       | TI  | N.T | F   | S  | T  | L  | N  | M  | T   | V    |
| 5b42931150f5f91012e72e09 | E                                                                                                         | G   | TS  | F   | S  | T  | N  | M  | T  |     | V    |
| 5b42931150f5f91012e72e7c | P                                                                                                         | G.N | TI  | N.T | F  | S  | T  | N  | M  | T   | V    |
| 5b42931150f5f91012e72e90 | G.N                                                                                                       | TI  | N.T | F   | S  | T  | N  | M  | T  |     | V    |
| 5b42931150f5f91012e733be | G.N                                                                                                       | TI  | N.T | F   | S  | T  | N  | M  | T  |     | V    |
| 5b42931150f5f91012e733ca | G.N                                                                                                       | TI  | N.T | F   | S  | T  | N  | M  | T  |     | V    |
| 5b42931150f5f91012e7332f | G.N                                                                                                       | TI  | N.T | F   | S  | T  | N  | M  | T  |     | V    |
| 5b42931150f5f91012e73242 | G.N                                                                                                       | TI  | N.T | F   | S  | T  | N  | M  | T  |     | V    |
| 5b42931150f5f91012e72df  | G                                                                                                         | S   | TI  | N.T | F  | S  | T  | N  | M  | T   | V    |
| 5b42931150f5f91012e73012 | G.N                                                                                                       | TI  | N.T | F   | S  | T  | N  | M  | T  |     | V    |
| 5b42931150f5f91012e72f72 | G.N                                                                                                       | TI  | N.T | F   | S  | T  | N  | M  | T  | D   | V    |
| 5b42931150f5f91012e7303b | G.N                                                                                                       | TI  | N.T | F   | K  | S  | T  | N  | M  | T   | V    |
| 5b42931150f5f91012e7325b | G.N                                                                                                       | TI  | N.T | F   | S  | T  | N  | M  | T  | E   | V    |
| 5b42931150f5f91012e73266 | L                                                                                                         | G.N | TI  | N.T | F  | S  | T  | N  | M  | T   | V    |
| 5b42931150f5f91012e7330a | G.N                                                                                                       | TI  | N.T | RF  | S  | T  | N  | M  | T  |     | V    |
| 5b42931150f5f91012e731ca | G                                                                                                         | K   | TI  | N.T | F  | S  | T  | N  | M  | T   | V    |
| 5b42931150f5f91012e731d2 | G.N                                                                                                       | TI  | N.T | F   | S  | T  | N  | M  | T  |     | V    |
| 5b42931150f5f91012e73237 | G.N                                                                                                       | TI  | N.T | F   | S  | T  | N  | M  | T  |     | V    |
| 5b42931150f5f91012e72ef2 | G.N                                                                                                       | TI  | N.T | F   | S  | T  | N  | M  | T  |     | V    |
| 5b42931150f5f91012e72e13 | G.N                                                                                                       | TI  | N.T | F   | S  | T  | SN | M  | T  |     | V    |
| 5b42931150f5f91012e73037 | G.N                                                                                                       | TI  | N.T | F   | S  | T  | N  | M  | T  |     | V    |
| 5b42931150f5f91012e730fb | G.N                                                                                                       | TI  | N.T | F   | S  | T  | L  | N  | M  | T   | V    |
| 5b42931150f5f91012e72ee3 | G.N                                                                                                       | TI  | N.T | F   | S  | T  | N  | M  | T  |     | V    |
| 5b42931150f5f91012e73081 | G.N                                                                                                       | TI  | N.T | F   | S  | T  | N  | M  | T  | L   | V    |
| 5b42931150f5f91012e73239 | G.N                                                                                                       | TI  | N.T | F   | S  | T  | N  | M  | T  |     | V    |
| 5b42931150f5f91012e72f1a | G.N                                                                                                       | TI  | N.T | F   | S  | T  | N  | M  | T  |     | V    |
| 5b42931150f5f91012e73223 | Q                                                                                                         | G.N | TI  | N.T | F  | S  | T  | N  | M  | T   | V    |
| 5b42931150f5f91012e72f0b | G.N                                                                                                       | TI  | N.T | F   | S  | T  | N  | M  | T  |     | V    |
| 5b42931150f5f91012e731ab | G.N                                                                                                       | TI  | N.T | F   | S  | T  | N  | M  | T  |     | V    |
| 5b42931150f5f91012e73022 | G.N                                                                                                       | TI  | N.T | F   | F  | S  | T  | N  | M  | T   | V    |
| 5b42931150f5f91012e72fb9 | G.N                                                                                                       | TI  | N.T | F   | S  | T  | N  | M  | T  |     | V    |
| 5b42931150f5f91012e72e50 | T                                                                                                         | G.N | TI  | N.T | F  | S  | T  | N  | M  | G   | V    |
| 5b42931150f5f91012e73397 | G.N                                                                                                       | TI  | N.T | F   | SY | T  | N  | M  | T  |     | V    |
| 5b42931150f5f91012e73024 | S                                                                                                         | G.N | TI  | N.T | F  | S  | T  | N  | M  | T   | V    |
| 5b42931150f5f91012e72f50 | G.N                                                                                                       | TI  | N.T | FV  | S  | T  | N  | M  | T  |     | V    |
| 5b42931150f5f91012e73274 | G.N                                                                                                       | TI  | N.T | F   | S  | T  | N  | M  | T  |     | V    |
| 5b42931150f5f91012e72e7f | G.N                                                                                                       | TI  | N.T | F   | S  | N  | T  | N  | M  | T   | V    |
| 5b42931150f5f91012e7302c | G.N                                                                                                       | TI  | N.T | F   | T  | S  | T  | N  | M  | T   | V    |
| 5b42931150f5f91012e7312c | GVN                                                                                                       | TI  | N.T | F   | S  | T  | N  | M  | T  |     | V    |
| 5b42931150f5f91012e72e5c | G.N                                                                                                       | TI  | N.T | F   | S  | CT | N  | M  | T  |     | V    |
| 5b42931150f5f91012e73296 | G.N                                                                                                       | TI  | N.T | F   | S  | T  | N  | M  | T  |     | V    |
| 5b42931150f5f91012e7311b | G.N                                                                                                       | T   | TI  | N.T | F  | S  | T  | N  | M  | T   | V    |
| 5b42931150f5f91012e730e3 | G.N                                                                                                       | TI  | N.T | F   | S  | T  | N  | M  | T  |     | V    |
| 5b42931150f5f91012e733c5 | G.N                                                                                                       | TI  | N.T | F   | S  | T  | N  | M  | T  |     | V    |
| 5b42931150f5f91012e73073 | L                                                                                                         | A   | R   | N   | L  | D  | N  | A  | T  | N   | V    |
| 5b42931150f5f91012e72f89 | V                                                                                                         | G.N | TI  | N.T | F  | S  | T  | N  | M  | T   | V    |
| 5b42931150f5f91012e72fbf | G                                                                                                         | G.N | TI  | N.T | F  | S  | T  | N  | M  | T   | V    |
| 5b42931150f5f91012e72e87 | G.N                                                                                                       | TI  | N.T | F   | S  | T  | N  | M  | T  |     | V    |
| 5b42931150f5f91012e72f37 | G.N                                                                                                       | TI  | N.T | F   | SC | T  | N  | M  | T  |     | V    |
| 5b42931150f5f91012e7337b | G.N                                                                                                       | TI  | N.T | F   | S  | S  | T  | N  | M  | T   | V    |
| 5b42931150f5f91012e72fe2 | G.N                                                                                                       | TI  | N.T | F   | S  | T  | N  | M  | T  |     | V    |
| 5b42931150f5f91012e72e56 | G.N                                                                                                       | TI  | N.T | F   | S  | T  | N  | M  | T  | A   | V    |
| 5b42931150f5f91012e72e3b | G.N                                                                                                       | TI  | N.T | F   | SS | T  | N  | M  | T  |     | V    |
| 5b42931150f5f91012e731a7 | G.N                                                                                                       | TI  | N.T | F   | ST | T  | N  | M  | T  |     | V    |
| 5b42931150f5f91012e73155 | G.N                                                                                                       | TI  | N.T | F   | L  | S  | T  | N  | M  | T   | V    |
| 5b42931150f5f91012e732db | G.N                                                                                                       | TI  | N.T | F   | S  | T  | N  | M  | T  |     | V    |
| 5b42931150f5f91012e732c1 | G.N                                                                                                       | TI  | N.T | F   | S  | T  | N  | M  | T  | E   | V    |
| 5b42931150f5f91012e73149 | G.N                                                                                                       | TI  | N.T | F   | S  | T  | N  | M  | T  |     | V    |
| 5b42931150f5f91012e733df | G.N                                                                                                       | TI  | N.T | F   | S  | T  | N  | M  | T  |     | V    |
| 5b42931150f5f91012e73189 | A                                                                                                         | I   | L   | V   | D  | T  | P  | P  | T  | N   | V    |
| 5b42931150f5f91012e733f1 | G.N                                                                                                       | TI  | N.T | F   | S  | T  | N  | M  | T  |     | V    |
| 5b42931150f5f91012e73160 | T                                                                                                         | G.N | TI  | N.T | F  | S  | T  | N  | M  | T   | V    |
| 5b42931150f5f91012e73325 | G.N                                                                                                       | TI  | N.T | F   | S  | LT | N  | M  | T  |     | V    |
| 5b42931150f5f91012e7324f | G.N                                                                                                       | TI  | N.T | F   | S  | T  | Y  | N  | M  | T   | V    |
| 5b42931150f5f91012e72e04 | G.N                                                                                                       | II  | N.T | F   | S  | T  | N  | M  | T  |     | V    |
| 5b42931150f5f91012e730e2 | G.N                                                                                                       | GN  | TI  | N.T | K  | S  | T  | N  | M  | T   | V    |
| 5b42931150f5f91012e72f9c | F                                                                                                         | G.N | TI  | N.T | F  | S  | T  | N  | M  | T   | V    |
| 5b42931150f5f91012e73253 | D                                                                                                         | G.N | TI  | N.T | F  | S  | T  | N  | M  | T   | V    |
| 5b42931150f5f91012e72f6b | A                                                                                                         | G.N | TI  | N.T | F  | S  | T  | N  | M  | T   | V    |
| 5b42931150f5f91012e73066 | G.N                                                                                                       | TI  | N.T | F   | L  | S  | T  | N  | M  | T   | V    |
| 5b42931150f5f91012e72f4c | G.N                                                                                                       | TI  | N.T | F   | S  | Y  | T  | N  | M  | T   | V    |
| 5b42931150f5f91012e7329a | Q                                                                                                         | G.N | TI  | N.T | F  | S  | T  | N  | M  | T   | V    |
| 5b42931150f5f91012e73248 | Y                                                                                                         | G.N | TI  | N.T | F  | S  | T  | N  | M  | T   | V    |

5b42931150f5f91012e731e3 .G.N. TI. N. T. F. S. S. T. N. M. T.
5b42931150f5f91012e72f1f .G.N. TI. N. T. F. S. D. T. N. M. T.
5b42931150f5f91012e731a0 .G.N. TI. N. T. F. S. S. T. N. M. T.
5b42931150f5f91012e7323c .G.N. TI. N. T. F. S. S. T. N. M. T.
5b42931150f5f91012e73294 .G.N. TI. N. T. F. S. S. S. T. N. M. T.
5b42931150f5f91012e733e9 .NIR. S. T. N. M. T.
5b42931150f5f91012e7326a .G.N. TI. N. T. F. S. S. T. N. M. T.
5b42931150f5f91012e72e11 .G.N. TI. N. T. F. S. S. T. N. M. T.
5b42931150f5f91012e72efb .G.N. TI. N. T. F. S. S. T. N. M. T.
5b42931150f5f91012e72fac .G.N. TI. N. T. F. S. S. T. N. M. T.
5b42931150f5f91012e7333f .G.N. TI. N. T. F. S. S. T. N. H. M. T.
5b42931150f5f91012e72e0c .G.N. TI. N. T. F. S. S. T. N. M. T.
5b42931150f5f91012e73227 T.G.N. TI. N. T. F. S. S. T. N. M. T.
5b42931150f5f91012e7321c .G.N. TI. N. T. F. S. S. T. N. M. T.
5b42931150f5f91012e72e41 .G.N. TI. N. T. F. S. S. T. N. M. T. I.
5b42931150f5f91012e72ec6 .G.N. TI. N. T. F. S. S. T. N. M. T.
5b42931150f5f91012e73211 .G.N. TI. N. T. F. S. S. T. N. M. T.
5b42931150f5f91012e72eba .G.N. R. T. F. S. S. T. N. M. T.
5b42931150f5f91012e72e85 .G.N. TI. N. T. F. S. S. K. T. N. M. T.
5b42931150f5f91012e73182 .G.N. TI. N. T. F. S. S. T. N. M. T.
5b42931150f5f91012e73132 .G.N. G. S. T. N. M. T.
5b42931150f5f91012e7311d .G.N. TI. N. T. F. P. S. S. T. N. M. T.
5b42931150f5f91012e733e0 .G.N. TI. N. T. F. S. S. T. N. M. T.
5b42931150f5f91012e72e70 .G.N. TI. N. T. F. S. S. TD. N. M. T.
5b42931150f5f91012e72e9c .G.N. TI. N. T. F. S. S. T. E. N. M. T.
5b42931150f5f91012e730fc .G.N. TI. N. T. F. S. S. T. N. M. T.
5b42931150f5f91012e73232 .G.N. TI. N. T. F. S. S. T. N. M. T.
5b42931150f5f91012e73181 .G.N. TI. N. T. F. S. S. T. N. M. T.
5b42931150f5f91012e73280 .G.N. TI. N. T. F. S. S. T. N. M. T.
5b42931150f5f91012e72fa8 R.G.N. TI. N. T. F. S. S. T. N. M. T.
5b42931150f5f91012e72fc6 .G.N. S. TI. N. T. F. S. S. T. N. M. T.
5b42931150f5f91012e732cb T.G.N. TI. N. T. F. S. S. T. N. M. T.
5b42931150f5f91012e72ee0 .G.N. TI. N. T. F. S. S. T. N. I. M. T.
5b42931150f5f91012e72f59 E.G.N. TI. N. T. F. S. S. T. N. M. T.
5b42931150f5f91012e72f04 .G.N. TI. N. T. F. S. S. T. N. M. T.
5b42931150f5f91012e72ebc .G.N. TI. N. T. F. S. S. I. N. M. T.
5b42931150f5f91012e73396 .G.N. TI. N. T. F. S. S. T. N. M. T.
5b42931150f5f91012e72e54 .G.N. TI. N. T. F. S. S. T. N. M. T.
5b42931150f5f91012e72f64 .G.N. TI. N. T. F. V. S. S. T. N. M. T.
5b42931150f5f91012e72eff .G.N. TI. N. T. F. S. L. T. N. M. T.
5b42931150f5f91012e72f75 .G.N. TI. N. T. F. S. S. A. N. M. T.
5b42931150f5f91012e72f8b .G.N. TN. N. T. F. S. S. T. N. M. T.
5b42931150f5f91012e73152 .G.N. TI. N. T. F. S. S. T. N. M. T.
5b42931150f5f91012e72ffc .G.N. TI. N. T. F. S. F. S. T. N. M. T.
5b42931150f5f91012e7320d .G.N. TI. N. T. F. S. S. T. N. M. T.
5b42931150f5f91012e72faf .G.N. TI. N. T. K. F. S. S. T. N. M. T.
5b42931150f5f91012e72f71 .G.N. TI. N. T. F. S. S. T. N. M. T.
5b42931150f5f91012e7337a .G.N. P. TI. N. T. F. S. S. T. N. M. T.
5b42931150f5f91012e732c3 V.G.N. L. N. T. F. S. S. T. N. M. T.
5b42931150f5f91012e733bf .G.N. TI. N. T. F. S. S. T. N. M. T.
5b42931150f5f91012e72f86 .G.N. TI. N. T. F. S. S. T. N. M. T.
5b42931150f5f91012e73056 .G.N. TI. N. T. F. S. S. I. N. M. T.
5b42931150f5f91012e73203 .G.N. TI. N. T. F. S. S. T. P. N. M. T.
5b42931150f5f91012e72f76 .G.N. TI. N. T. F. S. S. T. N. M. T.
5b42931150f5f91012e730f3 .G.N. TI. N. T. F. S. S. T. N. M. T.
5b42931150f5f91012e72f29 .G.N. TI. N. T. F. S. S. T. N. M. T.
5b42931150f5f91012e730a5 M.G.N. TI. N. T. F. S. S. T. N. M. T.
5b42931150f5f91012e72e22 .G.N. TI. N. T. F. S. S. T. N. M. T.
5b42931150f5f91012e73221 .G.N. TI. N. T. F. S. S. T. N. M. T.
5b42931150f5f91012e73250 .G.N. TI. N. T. F. S. S. T. N. L. M. T.
5b42931150f5f91012e730d3 D.G.N. P. GS. E. V. T. T. V. L. M. T.
5b42931150f5f91012e732de .G.N. TI. N. T. F. S. S. T. N. M. C. T.
5b42931150f5f91012e73341 .G.N. TI. N. T. F. S. S. T. N. M. T.
5b42931150f5f91012e72ef8 .G.N. KTI. N. T. F. S. S. T. N. M. T.
5b42931150f5f91012e73312 .G.N. TI. N. T. F. S. S. T. N. VM. T.
5b42931150f5f91012e72e4a .G.N. TI. N. T. F. S. S. T. N. M. T.
5b42931150f5f91012e72f28 .G.N. TI. N. T. F. S. S. T. N. M. T.
5b42931150f5f91012e731b8 .G.N. TI. N. T. F. S. I. T. N. M. T.
5b42931150f5f91012e73068 .G.N. TI. N. T. F. S. S. T. N. M. T.
5b42931150f5f91012e72e94 .G.N. TI. N. T. F. S. S. T. N. M. T.
5b42931150f5f91012e73020 Y.S.G.N. TI. N. T. F. S. S. V. T. N. M. T.
5b42931150f5f91012e733c7 .G.N. TI. N. T. F. S. S. T. N. M. T.
5b42931150f5f91012e73000 .G.N. TI. N. T. F. S. S. T. N. M. T.
5b42931150f5f91012e72fe7 .G.N. TI. N. T. F. S. S. TS. N. M. T.
5b42931150f5f91012e730c1 .G.N. TI. N. T. F. S. S. T. N. M. T.
5b42931150f5f91012e731ec F.G.N. TI. N. T. F. S. S. T. N. M. T.
5b42931150f5f91012e72ffe .G.N. TI. N. T. C. F. S. S. T. N. M. T.
5b42931150f5f91012e73025 .G.N. TI. N. T. F. S. S. T. N. M. T.
5b42931150f5f91012e730df .G.N. TI. N. T. F. S. S. T. N. M. W. T.
5b42931150f5f91012e72f2a .G.N. Y. TI. N. T. F. S. S. T. N. M. T.
5b42931150f5f91012e72f1e .G.N. R. P. V. F. F. D. T. N. M. T.
5b42931150f5f91012e73252 .G.N. TI. N. T. F. T. S. S. T. N. M. T.
5b42931150f5f91012e730dc S.G.N. TI. N. T. F. S. S. T. N. M. T.
5b42931150f5f91012e731c6 .G.N. TI. N. T. F. S. S. T. N. M. T.
5b42931150f5f91012e73059 .G.N. TI. N. T. F. S. S. T. N. M. T.
5b42931150f5f91012e733de .G.NI. TI. N. T. F. S. S. T. N. M. T.
5b42931150f5f91012e731d0 .G.N. TI. N. T. F. S. S. T. N. M. T.
5b42931150f5f91012e7309d .G.N. TI. N. T. F. S. S. K. T. N. M. T.
5b42931150f5f91012e7318b .G.N. TI. N. T. F. S. S. T. N. M. T.
5b42931150f5f91012e72e25 V.G. IN. I. D. S. T. N. M. T.
5b42931150f5f91012e72f2e .G.N. TI. N. T. F. I. S. S. T. N. M. T.
5b42931150f5f91012e72feb .G.N. P. TI. N. T. F. S. S. T. N. M. T.
5b42931150f5f91012e730b3 .G.N. TI. N. T. F. S. R. T. N. M. T.
5b42931150f5f91012e72e63 .G.N. TI. N. T. F. S. T. A. N. M. T.
5b42931150f5f91012e73070 .G.N. TI. N. T. F. S. S. N. N. M. T.
5b42931150f5f91012e73011 .G.N. TI. N. T. F. S. S. T. N. D. M. T.
5b42931150f5f91012e73141 .G.N. TI. N. T. F. S. S. T. N. M. T.
5b42931150f5f91012e72f2c E.G. TS. T. Y. T. N. M. T.
5b42931150f5f91012e73148 V.A.G.N. TI. N. T. F. S. S. T. N. M. T.
5b42931150f5f91012e73268 .G.N. TI. N. T. F. S. S. T. N. M. T.
5b42931150f5f91012e72fcb Y.G.N. TI. N. T. F. S. S. T. N. M. T.
5b42931150f5f91012e730b0 .G.N. TI. N. T. F. H. S. T. N. M. T.
5b42931150f5f91012e72ef7 T.A.L. TN. A. D. N. S. T. N. M. T.
5b42931150f5f91012e72e2d .G.N. TI. N. T. F. S. S. LT. N. M. T.
5b42931150f5f91012e72fc8 .G.N. TI. N. T. F. S. S. T. N. M. T.
5b42931150f5f91012e72f07 M.G.N. TI. N. T. F. S. S. T. N. M. T.

5b42931150f5f91012e732e1 .....G.N.....T.I.N.T.F.....S.....T.N.N.M.T.....V  
5b42931150f5f91012e72f19 .....G.N.....T.I.N.T.F.....S.....T.N.N.M.T.....  
5b42931150f5f91012e730c8 .....G.N.....T.I.N.T.F.....S.....T.N.N.M.T.....  
5b42931150f5f91012e72e1e .....G.N.....T.I.N.T.F.....S.....T.N.N.M.T.....  
5b42931150f5f91012e7316f .....G.N.....T.I.N.T.F.....S.....T.N.N.M.T.....  
5b42931150f5f91012e7338d .....G.N.....T.I.N.T.F.....F.....S.....G.T.....N.N.M.T.....  
5b42931150f5f91012e72e19 .....G.N.....T.I.N.T.F.....S.....T.N.N.M.H.....T.....  
5b42931150f5f91012e72f4a .....G.N.....T.I.N.T.F.....S.....T.N.N.M.T.....  
5b42931150f5f91012e7329b .....G.N.....T.I.N.T.F.....S.....T.N.N.M.T.....  
5b42931150f5f91012e73199 .....F.....G.N.....T.I.N.T.F.....S.....T.N.N.M.T.....  
5b42931150f5f91012e7301f .....G.N.....T.I.N.T.F.....V.....S.....T.N.N.M.T.....  
5b42931150f5f91012e72f0c .....M.....A.....AV.....G.....EDI.....NS.....P.T.M.....S.....T.N.N.M.T.....  
5b42931150f5f91012e73333 .....G.N.....T.I.N.T.F.....S.....T.N.N.H.....M.T.....  
5b42931150f5f91012e72f1d .....G.N.....T.I.N.T.F.....S.....T.N.N.M.T.....  
5b42931150f5f91012e732d5 .....G.N.....T.I.N.T.F.....P.....S.....T.N.N.M.T.....  
5b42931150f5f91012e730ca .....G.N.....T.I.N.T.F.....S.....T.N.N.M.T.....  
5b42931150f5f91012e72ef1 .....V.....G.N.....T.I.N.T.F.....S.....T.N.N.M.T.....  
5b42931150f5f91012e72ec2 .....G.N.....T.I.G.N.T.F.....S.....T.N.N.M.T.....  
5b42931150f5f91012e7318e .....G.N.....T.I.N.T.F.....S.....C.....T.N.N.M.T.....  
5b42931150f5f91012e733d9 .....CV.....G.N.....T.I.N.T.F.....S.....T.N.N.M.T.....  
5b42931150f5f91012e73257 .....G.N.....T.I.N.T.VF.....DS.....T.N.N.M.T.....  
5b42931150f5f91012e731fd .....G.N.....T.I.N.T.F.....S.....T.N.N.M.T.....L.....  
5b42931150f5f91012e731f8 .....G.N.....T.I.N.T.F.....S.....T.N.N.M.T.....  
5b42931150f5f91012e72faa .....T.I.N.T.F.....S.....T.N.N.M.T.....  
5b42931150f5f91012e73241 .....G.N.....T.I.N.T.F.....S.....T.N.N.M.T.....  
5b42931150f5f91012e72f2ff .....G.N.....RTI.....N.T.F.....S.....T.N.N.M.T.....  
5b42931150f5f91012e73309 .....G.N.....T.I.N.T.F.....S.....T.N.N.M.T.....  
5b42931150f5f91012e72ea2 .....S.....T.N.N.M.T.....  
5b42931150f5f91012e7327d .....P.....G.N.....T.I.N.T.F.....S.....T.N.N.M.T.....  
5b42931150f5f91012e733d5 .....G.N.....T.I.N.T.F.....S.....T.N.N.M.T.....  
5b42931150f5f91012e72e62 .....G.N.....T.I.N.T.F.....S.....T.N.N.L.M.T.....  
5b42931150f5f91012e7308a .....A.....T.....S.....T.N.N.M.T.....  
5b42931150f5f91012e72f4e .....G.N.....T.I.N.T.F.....S.....T.N.N.M.T.....  
5b42931150f5f91012e73184 .....G.N.....T.I.N.T.F.....S.....T.N.N.G.....M.T.....  
5b42931150f5f91012e73260 .....G.N.....T.I.N.T.F.....S.....T.N.N.M.T.....  
5b42931150f5f91012e73229 .....A.....N.....S.....T.N.N.M.T.....  
5b42931150f5f91012e73055 .....G.N.....T.I.N.T.F.....S.....T.N.N.M.T.....  
5b42931150f5f91012e73018 .....G.N.....T.I.N.T.F.....S.....T.N.N.M.T.....  
5b42931150f5f91012e73035 .....G.N.....T.I.N.T.F.....S.....T.N.N.M.T.....  
5b42931150f5f91012e72fda .....G.N.....T.I.N.T.F.....S.....R.....N.N.M.T.....  
5b42931150f5f91012e72fc4 .....G.N.....T.I.N.T.F.....S.....G.....T.N.N.M.T.....  
5b42931150f5f91012e731c4 .....G.N.....T.I.N.T.F.....S.....T.N.N.M.T.....  
5b42931150f5f91012e7333d .....K.....KG.N.....T.I.N.T.F.....S.....T.N.N.M.T.....  
5b42931150f5f91012e7314e .....G.N.....T.I.N.T.F.....S.....T.N.N.M.T.....  
5b42931150f5f91012e72f36 .....F.....G.N.....T.I.N.T.F.....S.....T.N.N.M.T.....  
5b42931150f5f91012e73061 .....G.N.....T.I.N.T.F.....S.....T.N.N.M.T.....  
5b42931150f5f91012e7319f .....G.N.....T.I.N.T.F.K.....S.....T.N.N.M.T.....  
5b42931150f5f91012e73236 .....G.N.....T.I.N.T.F.....S.....T.N.N.M.T.....  
5b42931150f5f91012e73034 .....G.N.....T.I.N.T.F.....S.....T.N.N.M.T.....  
5b42931150f5f91012e72e92 .....G.N.....T.I.N.T.F.....S.....T.N.N.M.T.....  
5b42931150f5f91012e73117 .....G.N.....T.I.N.T.F.....H.....S.....T.N.N.M.T.....  
5b42931150f5f91012e731b6 .....G.N.....T.I.N.T.F.....S.....T.N.N.M.T.....  
5b42931150f5f91012e72f56 .....G.NP.....T.I.N.T.F.....S.....T.N.N.M.T.....  
5b42931150f5f91012e732c8 .....G.N.....T.I.N.T.F.....S.....V.....T.N.N.M.T.....  
5b42931150f5f91012e7330b .....G.N.....T.I.N.T.F.....S.....T.N.N.MD.....T.....  
5b42931150f5f91012e732cc .....G.N.....T.I.N.T.F.....P.....T.N.N.M.T.....  
5b42931150f5f91012e731df .....I.G.D.....I.....T.N.N.M.T.....  
5b42931150f5f91012e72ff5 .....P.F.....G.N.....T.I.N.T.F.....S.....T.N.N.M.T.....  
5b42931150f5f91012e72fd6 .....G.N.....T.I.N.T.F.....S.....T.N.N.M.T.....  
5b42931150f5f91012e73207 .....D.....G.N.....T.I.N.T.F.....S.....T.N.N.M.T.....  
5b42931150f5f91012e731c5 .....G.N.....T.I.N.T.F.....S.....I.....N.N.M.T.....  
5b42931150f5f91012e73230 .....M.....DI.V.....N.....T.I.N.T.F.....S.....T.N.N.M.T.....  
5b42931150f5f91012e7306c .....G.N.....T.I.N.T.F.....L.....N.N.M.T.....  
5b42931150f5f91012e733d2 .....G.N.....T.I.N.T.F.....S.....T.N.N.M.T.....  
5b42931150f5f91012e73092 .....G.N.....T.I.N.T.F.....S.....T.N.N.M.T.....  
5b42931150f5f91012e732cd .....GVN.....T.I.N.T.F.....S.....T.N.N.M.T.....  
5b42931150f5f91012e72f73 .....G.N.....T.I.N.T.F.....S.....Q.....T.N.N.M.T.....  
5b42931150f5f91012e73010 .....G.N.....T.I.N.T.F.....S.....V.....T.N.N.M.T.....  
5b42931150f5f91012e72ea0 .....D.....P.....N.T.F.....S.....T.N.N.M.T.....  
5b42931150f5f91012e7338c .....T.I.N.T.F.....S.....T.N.N.M.T.....
