# Supplementary material for: Diverse patterns of antibody variable gene repertoire disruption in patients with amyloid light chain (AL) amyloidosis
Source: PubMed Central journal article supplement (PMC7340310; doi:10.1371/journal.pone.0235713), 2020-07-07
Supplement: pone.0235713.s011.pdf [file pone.0235713.s011.pdf]

|                          | 1                                                                                                                                                                                                                                                                                                                                                                                                                                                                                                                                                                                                                                                                                                                                                                                                                                                                                                                                                                                                                                                                                                                                                                                                                                                                                                                                                                                                                                                                                                                                                                                                                                                                                                                                                                                                                                                                                                                                                                                                                                                                                                                                                                                                                                                                                                                                                                                                                                                                                                                                                                                                                                                                                                                                                                                                                                                                                                                                                                                                                                                                                                                                                                                                                                                                                                                                                                                                                                                                                                                                                                                                                                                                                                                                                                                                                                                                                                                                                                                                                                                                                                                                                                                                                                                                                                                                                                        | 20 | 30 | 40 | 50 | 60 | 70 | 80 | 90 | 100 | 110 |          |  |
|--------------------------|--------------------------------------------------------------------------------------------------------------------------------------------------------------------------------------------------------------------------------------------------------------------------------------------------------------------------------------------------------------------------------------------------------------------------------------------------------------------------------------------------------------------------------------------------------------------------------------------------------------------------------------------------------------------------------------------------------------------------------------------------------------------------------------------------------------------------------------------------------------------------------------------------------------------------------------------------------------------------------------------------------------------------------------------------------------------------------------------------------------------------------------------------------------------------------------------------------------------------------------------------------------------------------------------------------------------------------------------------------------------------------------------------------------------------------------------------------------------------------------------------------------------------------------------------------------------------------------------------------------------------------------------------------------------------------------------------------------------------------------------------------------------------------------------------------------------------------------------------------------------------------------------------------------------------------------------------------------------------------------------------------------------------------------------------------------------------------------------------------------------------------------------------------------------------------------------------------------------------------------------------------------------------------------------------------------------------------------------------------------------------------------------------------------------------------------------------------------------------------------------------------------------------------------------------------------------------------------------------------------------------------------------------------------------------------------------------------------------------------------------------------------------------------------------------------------------------------------------------------------------------------------------------------------------------------------------------------------------------------------------------------------------------------------------------------------------------------------------------------------------------------------------------------------------------------------------------------------------------------------------------------------------------------------------------------------------------------------------------------------------------------------------------------------------------------------------------------------------------------------------------------------------------------------------------------------------------------------------------------------------------------------------------------------------------------------------------------------------------------------------------------------------------------------------------------------------------------------------------------------------------------------------------------------------------------------------------------------------------------------------------------------------------------------------------------------------------------------------------------------------------------------------------------------------------------------------------------------------------------------------------------------------------------------------------------------------------------------------------------------------------|----|----|----|----|----|----|----|----|-----|-----|----------|--|
|                          | <p style="text-align: center;"> <span style="color: blue;">N</span> <span style="color: red;">F</span> <span style="color: green;">M</span> <span style="color: cyan;">L</span> <span style="color: magenta;">T</span> <span style="color: yellow;">Q</span> <span style="color: black;">P</span> <span style="color: blue;">H</span> <span style="color: red;">S</span> <span style="color: green;">V</span> <span style="color: cyan;">S</span> <span style="color: magenta;">E</span> <span style="color: yellow;">S</span> <span style="color: black;">P</span> <span style="color: blue;">G</span> <span style="color: red;">K</span> <span style="color: green;">T</span> <span style="color: cyan;">V</span> <span style="color: magenta;">T</span> <span style="color: yellow;">I</span> <span style="color: black;">S</span> <span style="color: blue;">C</span> <span style="color: red;">R</span> <span style="color: green;">S</span> <span style="color: cyan;">S</span> <span style="color: magenta;">G</span> <span style="color: yellow;">S</span> <span style="color: black;">I</span> <span style="color: blue;">A</span> <span style="color: red;">S</span> <span style="color: green;">N</span> <span style="color: cyan;">V</span> <span style="color: magenta;">Y</span> <span style="color: yellow;">Q</span> <span style="color: black;">W</span> <span style="color: blue;">Y</span> <span style="color: red;">Q</span> <span style="color: green;">O</span> <span style="color: cyan;">R</span> <span style="color: magenta;">R</span> <span style="color: yellow;">P</span> <span style="color: black;">G</span> <span style="color: blue;">S</span> <span style="color: red;">S</span> <span style="color: green;">P</span> <span style="color: cyan;">T</span> <span style="color: magenta;">T</span> <span style="color: yellow;">V</span> <span style="color: black;">I</span> <span style="color: blue;">Y</span> <span style="color: red;">E</span> <span style="color: green;">D</span> <span style="color: cyan;">N</span> <span style="color: magenta;">O</span> <span style="color: yellow;">R</span> <span style="color: black;">P</span> <span style="color: blue;">S</span> <span style="color: red;">G</span> <span style="color: green;">V</span> <span style="color: cyan;">P</span> <span style="color: magenta;">D</span> <span style="color: yellow;">R</span> <span style="color: black;">F</span> <span style="color: blue;">R</span> <span style="color: red;">F</span> <span style="color: green;">S</span> <span style="color: cyan;">G</span> <span style="color: magenta;">S</span> <span style="color: yellow;">I</span> <span style="color: black;">D</span> <span style="color: blue;">S</span> <span style="color: red;">S</span> <span style="color: green;">S</span> <span style="color: cyan;">N</span> <span style="color: magenta;">S</span> <span style="color: yellow;">A</span> <span style="color: black;">S</span> <span style="color: blue;">L</span> <span style="color: red;">T</span> <span style="color: green;">I</span> <span style="color: cyan;">S</span> <span style="color: magenta;">G</span> <span style="color: yellow;">L</span> <span style="color: black;">K</span> <span style="color: blue;">T</span> <span style="color: red;">E</span> <span style="color: green;">D</span> <span style="color: cyan;">E</span> <span style="color: magenta;">A</span> <span style="color: yellow;">D</span> <span style="color: black;">Y</span> <span style="color: blue;">Y</span> <span style="color: red;">C</span> <span style="color: green;">Q</span> <span style="color: cyan;">S</span> <span style="color: magenta;">Y</span> <span style="color: yellow;">D</span> <span style="color: black;">S</span> <span style="color: blue;">S</span> <span style="color: red;">N</span> <span style="color: green;">Q</span> <span style="color: cyan;">W</span> <span style="color: magenta;">V</span> <span style="color: yellow;">F</span> <span style="color: black;">G</span> <span style="color: blue;">G</span> <span style="color: red;">G</span> <span style="color: green;">T</span> <span style="color: cyan;">K</span> <span style="color: magenta;">L</span> <span style="color: yellow;">T</span> <span style="color: black;">V</span> <span style="color: blue;">L</span> </p> |    |    |    |    |    |    |    |    |     |     |          |  |
| 5b4292e250f5f91012e6d695 | I                                                                                                                                                                                                                                                                                                                                                                                                                                                                                                                                                                                                                                                                                                                                                                                                                                                                                                                                                                                                                                                                                                                                                                                                                                                                                                                                                                                                                                                                                                                                                                                                                                                                                                                                                                                                                                                                                                                                                                                                                                                                                                                                                                                                                                                                                                                                                                                                                                                                                                                                                                                                                                                                                                                                                                                                                                                                                                                                                                                                                                                                                                                                                                                                                                                                                                                                                                                                                                                                                                                                                                                                                                                                                                                                                                                                                                                                                                                                                                                                                                                                                                                                                                                                                                                                                                                                                                        | T  | T  | D  | Y  | R  |    |    |    | Q   | S   | FR1      |  |
| 5b4292e250f5f91012e6d65c | I                                                                                                                                                                                                                                                                                                                                                                                                                                                                                                                                                                                                                                                                                                                                                                                                                                                                                                                                                                                                                                                                                                                                                                                                                                                                                                                                                                                                                                                                                                                                                                                                                                                                                                                                                                                                                                                                                                                                                                                                                                                                                                                                                                                                                                                                                                                                                                                                                                                                                                                                                                                                                                                                                                                                                                                                                                                                                                                                                                                                                                                                                                                                                                                                                                                                                                                                                                                                                                                                                                                                                                                                                                                                                                                                                                                                                                                                                                                                                                                                                                                                                                                                                                                                                                                                                                                                                                        | T  | T  | D  |    | R  |    |    |    | Q   | S   | FR1      |  |
| 5b4292e250f5f91012e6d788 | I                                                                                                                                                                                                                                                                                                                                                                                                                                                                                                                                                                                                                                                                                                                                                                                                                                                                                                                                                                                                                                                                                                                                                                                                                                                                                                                                                                                                                                                                                                                                                                                                                                                                                                                                                                                                                                                                                                                                                                                                                                                                                                                                                                                                                                                                                                                                                                                                                                                                                                                                                                                                                                                                                                                                                                                                                                                                                                                                                                                                                                                                                                                                                                                                                                                                                                                                                                                                                                                                                                                                                                                                                                                                                                                                                                                                                                                                                                                                                                                                                                                                                                                                                                                                                                                                                                                                                                        | T  | D  | A  | R  |    |    |    |    | Q   | S   | CDR1     |  |
| 5b4292e250f5f91012e6d72e | I                                                                                                                                                                                                                                                                                                                                                                                                                                                                                                                                                                                                                                                                                                                                                                                                                                                                                                                                                                                                                                                                                                                                                                                                                                                                                                                                                                                                                                                                                                                                                                                                                                                                                                                                                                                                                                                                                                                                                                                                                                                                                                                                                                                                                                                                                                                                                                                                                                                                                                                                                                                                                                                                                                                                                                                                                                                                                                                                                                                                                                                                                                                                                                                                                                                                                                                                                                                                                                                                                                                                                                                                                                                                                                                                                                                                                                                                                                                                                                                                                                                                                                                                                                                                                                                                                                                                                                        | T  | D  |    | R  |    |    | N  |    | Q   | S   | FR2      |  |
| 5b4292e250f5f91012e6d6ad | I                                                                                                                                                                                                                                                                                                                                                                                                                                                                                                                                                                                                                                                                                                                                                                                                                                                                                                                                                                                                                                                                                                                                                                                                                                                                                                                                                                                                                                                                                                                                                                                                                                                                                                                                                                                                                                                                                                                                                                                                                                                                                                                                                                                                                                                                                                                                                                                                                                                                                                                                                                                                                                                                                                                                                                                                                                                                                                                                                                                                                                                                                                                                                                                                                                                                                                                                                                                                                                                                                                                                                                                                                                                                                                                                                                                                                                                                                                                                                                                                                                                                                                                                                                                                                                                                                                                                                                        | T  | D  |    | R  |    |    |    |    | Q   | S   | FR2      |  |
| 5b4292e250f5f91012e6d781 | I                                                                                                                                                                                                                                                                                                                                                                                                                                                                                                                                                                                                                                                                                                                                                                                                                                                                                                                                                                                                                                                                                                                                                                                                                                                                                                                                                                                                                                                                                                                                                                                                                                                                                                                                                                                                                                                                                                                                                                                                                                                                                                                                                                                                                                                                                                                                                                                                                                                                                                                                                                                                                                                                                                                                                                                                                                                                                                                                                                                                                                                                                                                                                                                                                                                                                                                                                                                                                                                                                                                                                                                                                                                                                                                                                                                                                                                                                                                                                                                                                                                                                                                                                                                                                                                                                                                                                                        | T  | D  |    | R  |    |    |    |    | Q   | S   | CDR2     |  |
| 5b4292e250f5f91012e6d6f0 | I                                                                                                                                                                                                                                                                                                                                                                                                                                                                                                                                                                                                                                                                                                                                                                                                                                                                                                                                                                                                                                                                                                                                                                                                                                                                                                                                                                                                                                                                                                                                                                                                                                                                                                                                                                                                                                                                                                                                                                                                                                                                                                                                                                                                                                                                                                                                                                                                                                                                                                                                                                                                                                                                                                                                                                                                                                                                                                                                                                                                                                                                                                                                                                                                                                                                                                                                                                                                                                                                                                                                                                                                                                                                                                                                                                                                                                                                                                                                                                                                                                                                                                                                                                                                                                                                                                                                                                        | T  | T  |    | R  |    |    |    |    | Q   | S   | CDR2     |  |
| 5b4292e250f5f91012e6d6d0 | I                                                                                                                                                                                                                                                                                                                                                                                                                                                                                                                                                                                                                                                                                                                                                                                                                                                                                                                                                                                                                                                                                                                                                                                                                                                                                                                                                                                                                                                                                                                                                                                                                                                                                                                                                                                                                                                                                                                                                                                                                                                                                                                                                                                                                                                                                                                                                                                                                                                                                                                                                                                                                                                                                                                                                                                                                                                                                                                                                                                                                                                                                                                                                                                                                                                                                                                                                                                                                                                                                                                                                                                                                                                                                                                                                                                                                                                                                                                                                                                                                                                                                                                                                                                                                                                                                                                                                                        | T  | D  |    | R  |    |    |    |    | Q   | S   | FR3      |  |
| 5b4292e250f5f91012e6d78c | I                                                                                                                                                                                                                                                                                                                                                                                                                                                                                                                                                                                                                                                                                                                                                                                                                                                                                                                                                                                                                                                                                                                                                                                                                                                                                                                                                                                                                                                                                                                                                                                                                                                                                                                                                                                                                                                                                                                                                                                                                                                                                                                                                                                                                                                                                                                                                                                                                                                                                                                                                                                                                                                                                                                                                                                                                                                                                                                                                                                                                                                                                                                                                                                                                                                                                                                                                                                                                                                                                                                                                                                                                                                                                                                                                                                                                                                                                                                                                                                                                                                                                                                                                                                                                                                                                                                                                                        | T  | D  |    | R  |    |    |    |    | Q   | S   | CDR3     |  |
| 5b4292e250f5f91012e6d7c1 | I                                                                                                                                                                                                                                                                                                                                                                                                                                                                                                                                                                                                                                                                                                                                                                                                                                                                                                                                                                                                                                                                                                                                                                                                                                                                                                                                                                                                                                                                                                                                                                                                                                                                                                                                                                                                                                                                                                                                                                                                                                                                                                                                                                                                                                                                                                                                                                                                                                                                                                                                                                                                                                                                                                                                                                                                                                                                                                                                                                                                                                                                                                                                                                                                                                                                                                                                                                                                                                                                                                                                                                                                                                                                                                                                                                                                                                                                                                                                                                                                                                                                                                                                                                                                                                                                                                                                                                        | T  | D  |    | R  |    |    | F  |    | Q   | S   | CDR3     |  |
| 5b4292e250f5f91012e6d7bf | I                                                                                                                                                                                                                                                                                                                                                                                                                                                                                                                                                                                                                                                                                                                                                                                                                                                                                                                                                                                                                                                                                                                                                                                                                                                                                                                                                                                                                                                                                                                                                                                                                                                                                                                                                                                                                                                                                                                                                                                                                                                                                                                                                                                                                                                                                                                                                                                                                                                                                                                                                                                                                                                                                                                                                                                                                                                                                                                                                                                                                                                                                                                                                                                                                                                                                                                                                                                                                                                                                                                                                                                                                                                                                                                                                                                                                                                                                                                                                                                                                                                                                                                                                                                                                                                                                                                                                                        | T  | D  |    | R  |    |    |    |    | Q   | S   | FR4      |  |
| 5b4292e250f5f91012e6d6b9 | I                                                                                                                                                                                                                                                                                                                                                                                                                                                                                                                                                                                                                                                                                                                                                                                                                                                                                                                                                                                                                                                                                                                                                                                                                                                                                                                                                                                                                                                                                                                                                                                                                                                                                                                                                                                                                                                                                                                                                                                                                                                                                                                                                                                                                                                                                                                                                                                                                                                                                                                                                                                                                                                                                                                                                                                                                                                                                                                                                                                                                                                                                                                                                                                                                                                                                                                                                                                                                                                                                                                                                                                                                                                                                                                                                                                                                                                                                                                                                                                                                                                                                                                                                                                                                                                                                                                                                                        | T  | D  |    | R  |    |    |    |    | Q   | S   | FR4      |  |
| 5b4292e250f5f91012e6d7c2 | WG                                                                                                                                                                                                                                                                                                                                                                                                                                                                                                                                                                                                                                                                                                                                                                                                                                                                                                                                                                                                                                                                                                                                                                                                                                                                                                                                                                                                                                                                                                                                                                                                                                                                                                                                                                                                                                                                                                                                                                                                                                                                                                                                                                                                                                                                                                                                                                                                                                                                                                                                                                                                                                                                                                                                                                                                                                                                                                                                                                                                                                                                                                                                                                                                                                                                                                                                                                                                                                                                                                                                                                                                                                                                                                                                                                                                                                                                                                                                                                                                                                                                                                                                                                                                                                                                                                                                                                       | I  | T  | D  |    | R  |    |    |    | Q   | S   | IGLV6-57 |  |
| 5b4292e250f5f91012e6d643 | I                                                                                                                                                                                                                                                                                                                                                                                                                                                                                                                                                                                                                                                                                                                                                                                                                                                                                                                                                                                                                                                                                                                                                                                                                                                                                                                                                                                                                                                                                                                                                                                                                                                                                                                                                                                                                                                                                                                                                                                                                                                                                                                                                                                                                                                                                                                                                                                                                                                                                                                                                                                                                                                                                                                                                                                                                                                                                                                                                                                                                                                                                                                                                                                                                                                                                                                                                                                                                                                                                                                                                                                                                                                                                                                                                                                                                                                                                                                                                                                                                                                                                                                                                                                                                                                                                                                                                                        | T  | L  | D  |    | R  |    |    |    | Q   | S   | IGLV6-57 |  |
| 5b4292e250f5f91012e6d6c5 | I                                                                                                                                                                                                                                                                                                                                                                                                                                                                                                                                                                                                                                                                                                                                                                                                                                                                                                                                                                                                                                                                                                                                                                                                                                                                                                                                                                                                                                                                                                                                                                                                                                                                                                                                                                                                                                                                                                                                                                                                                                                                                                                                                                                                                                                                                                                                                                                                                                                                                                                                                                                                                                                                                                                                                                                                                                                                                                                                                                                                                                                                                                                                                                                                                                                                                                                                                                                                                                                                                                                                                                                                                                                                                                                                                                                                                                                                                                                                                                                                                                                                                                                                                                                                                                                                                                                                                                        | T  | D  |    | R  |    |    |    |    | Q   | S   | IGLV6-57 |  |
| 5b4292e250f5f91012e6d650 | I                                                                                                                                                                                                                                                                                                                                                                                                                                                                                                                                                                                                                                                                                                                                                                                                                                                                                                                                                                                                                                                                                                                                                                                                                                                                                                                                                                                                                                                                                                                                                                                                                                                                                                                                                                                                                                                                                                                                                                                                                                                                                                                                                                                                                                                                                                                                                                                                                                                                                                                                                                                                                                                                                                                                                                                                                                                                                                                                                                                                                                                                                                                                                                                                                                                                                                                                                                                                                                                                                                                                                                                                                                                                                                                                                                                                                                                                                                                                                                                                                                                                                                                                                                                                                                                                                                                                                                        | T  | D  |    | R  |    |    |    |    | Q   | S   | IGLV6-57 |  |
| 5b4292e250f5f91012e6d72d | I                                                                                                                                                                                                                                                                                                                                                                                                                                                                                                                                                                                                                                                                                                                                                                                                                                                                                                                                                                                                                                                                                                                                                                                                                                                                                                                                                                                                                                                                                                                                                                                                                                                                                                                                                                                                                                                                                                                                                                                                                                                                                                                                                                                                                                                                                                                                                                                                                                                                                                                                                                                                                                                                                                                                                                                                                                                                                                                                                                                                                                                                                                                                                                                                                                                                                                                                                                                                                                                                                                                                                                                                                                                                                                                                                                                                                                                                                                                                                                                                                                                                                                                                                                                                                                                                                                                                                                        | T  | D  |    | R  |    |    |    |    | Q   | S   | IGLV6-57 |  |
| 5b4292e250f5f91012e6d644 | I                                                                                                                                                                                                                                                                                                                                                                                                                                                                                                                                                                                                                                                                                                                                                                                                                                                                                                                                                                                                                                                                                                                                                                                                                                                                                                                                                                                                                                                                                                                                                                                                                                                                                                                                                                                                                                                                                                                                                                                                                                                                                                                                                                                                                                                                                                                                                                                                                                                                                                                                                                                                                                                                                                                                                                                                                                                                                                                                                                                                                                                                                                                                                                                                                                                                                                                                                                                                                                                                                                                                                                                                                                                                                                                                                                                                                                                                                                                                                                                                                                                                                                                                                                                                                                                                                                                                                                        | T  | D  |    | R  |    |    |    |    | Q   | S   | IGLV6-57 |  |
| 5b4292e250f5f91012e6d642 | I                                                                                                                                                                                                                                                                                                                                                                                                                                                                                                                                                                                                                                                                                                                                                                                                                                                                                                                                                                                                                                                                                                                                                                                                                                                                                                                                                                                                                                                                                                                                                                                                                                                                                                                                                                                                                                                                                                                                                                                                                                                                                                                                                                                                                                                                                                                                                                                                                                                                                                                                                                                                                                                                                                                                                                                                                                                                                                                                                                                                                                                                                                                                                                                                                                                                                                                                                                                                                                                                                                                                                                                                                                                                                                                                                                                                                                                                                                                                                                                                                                                                                                                                                                                                                                                                                                                                                                        | T  | K  | D  |    | R  |    |    |    | Q   | S   | IGLV6-57 |  |
| 5b4292e250f5f91012e6d666 | A                                                                                                                                                                                                                                                                                                                                                                                                                                                                                                                                                                                                                                                                                                                                                                                                                                                                                                                                                                                                                                                                                                                                                                                                                                                                                                                                                                                                                                                                                                                                                                                                                                                                                                                                                                                                                                                                                                                                                                                                                                                                                                                                                                                                                                                                                                                                                                                                                                                                                                                                                                                                                                                                                                                                                                                                                                                                                                                                                                                                                                                                                                                                                                                                                                                                                                                                                                                                                                                                                                                                                                                                                                                                                                                                                                                                                                                                                                                                                                                                                                                                                                                                                                                                                                                                                                                                                                        | I  | T  | D  |    | R  |    |    |    | Q   | S   | IGLV6-57 |  |
| 5b4292e250f5f91012e6d6f5 | I                                                                                                                                                                                                                                                                                                                                                                                                                                                                                                                                                                                                                                                                                                                                                                                                                                                                                                                                                                                                                                                                                                                                                                                                                                                                                                                                                                                                                                                                                                                                                                                                                                                                                                                                                                                                                                                                                                                                                                                                                                                                                                                                                                                                                                                                                                                                                                                                                                                                                                                                                                                                                                                                                                                                                                                                                                                                                                                                                                                                                                                                                                                                                                                                                                                                                                                                                                                                                                                                                                                                                                                                                                                                                                                                                                                                                                                                                                                                                                                                                                                                                                                                                                                                                                                                                                                                                                        | T  | P  | D  |    | R  |    |    |    | Q   | S   | IGLV6-57 |  |
| 5b4292e250f5f91012e6d73b | I                                                                                                                                                                                                                                                                                                                                                                                                                                                                                                                                                                                                                                                                                                                                                                                                                                                                                                                                                                                                                                                                                                                                                                                                                                                                                                                                                                                                                                                                                                                                                                                                                                                                                                                                                                                                                                                                                                                                                                                                                                                                                                                                                                                                                                                                                                                                                                                                                                                                                                                                                                                                                                                                                                                                                                                                                                                                                                                                                                                                                                                                                                                                                                                                                                                                                                                                                                                                                                                                                                                                                                                                                                                                                                                                                                                                                                                                                                                                                                                                                                                                                                                                                                                                                                                                                                                                                                        | T  | D  |    | R  |    |    |    |    | Q   | S   | IGLV6-57 |  |
| 5b4292e250f5f91012e6d71d | I                                                                                                                                                                                                                                                                                                                                                                                                                                                                                                                                                                                                                                                                                                                                                                                                                                                                                                                                                                                                                                                                                                                                                                                                                                                                                                                                                                                                                                                                                                                                                                                                                                                                                                                                                                                                                                                                                                                                                                                                                                                                                                                                                                                                                                                                                                                                                                                                                                                                                                                                                                                                                                                                                                                                                                                                                                                                                                                                                                                                                                                                                                                                                                                                                                                                                                                                                                                                                                                                                                                                                                                                                                                                                                                                                                                                                                                                                                                                                                                                                                                                                                                                                                                                                                                                                                                                                                        | T  | H  | D  |    | R  |    |    |    | Q   | S   | IGLV6-57 |  |
| 5b4292e250f5f91012e6d74e | I                                                                                                                                                                                                                                                                                                                                                                                                                                                                                                                                                                                                                                                                                                                                                                                                                                                                                                                                                                                                                                                                                                                                                                                                                                                                                                                                                                                                                                                                                                                                                                                                                                                                                                                                                                                                                                                                                                                                                                                                                                                                                                                                                                                                                                                                                                                                                                                                                                                                                                                                                                                                                                                                                                                                                                                                                                                                                                                                                                                                                                                                                                                                                                                                                                                                                                                                                                                                                                                                                                                                                                                                                                                                                                                                                                                                                                                                                                                                                                                                                                                                                                                                                                                                                                                                                                                                                                        | R  | T  | D  |    | R  |    |    |    | Q   | S   | IGLV6-57 |  |
| 5b4292e250f5f91012e6d6ee | I                                                                                                                                                                                                                                                                                                                                                                                                                                                                                                                                                                                                                                                                                                                                                                                                                                                                                                                                                                                                                                                                                                                                                                                                                                                                                                                                                                                                                                                                                                                                                                                                                                                                                                                                                                                                                                                                                                                                                                                                                                                                                                                                                                                                                                                                                                                                                                                                                                                                                                                                                                                                                                                                                                                                                                                                                                                                                                                                                                                                                                                                                                                                                                                                                                                                                                                                                                                                                                                                                                                                                                                                                                                                                                                                                                                                                                                                                                                                                                                                                                                                                                                                                                                                                                                                                                                                                                        | T  | D  |    | R  |    |    |    |    | Q   | S   | IGLV6-57 |  |
| 5b4292e250f5f91012e6d63f | I                                                                                                                                                                                                                                                                                                                                                                                                                                                                                                                                                                                                                                                                                                                                                                                                                                                                                                                                                                                                                                                                                                                                                                                                                                                                                                                                                                                                                                                                                                                                                                                                                                                                                                                                                                                                                                                                                                                                                                                                                                                                                                                                                                                                                                                                                                                                                                                                                                                                                                                                                                                                                                                                                                                                                                                                                                                                                                                                                                                                                                                                                                                                                                                                                                                                                                                                                                                                                                                                                                                                                                                                                                                                                                                                                                                                                                                                                                                                                                                                                                                                                                                                                                                                                                                                                                                                                                        | T  | D  |    | R  |    |    |    |    | Q   | S   | IGLV6-57 |  |
| 5b4292e250f5f91012e6d732 | I                                                                                                                                                                                                                                                                                                                                                                                                                                                                                                                                                                                                                                                                                                                                                                                                                                                                                                                                                                                                                                                                                                                                                                                                                                                                                                                                                                                                                                                                                                                                                                                                                                                                                                                                                                                                                                                                                                                                                                                                                                                                                                                                                                                                                                                                                                                                                                                                                                                                                                                                                                                                                                                                                                                                                                                                                                                                                                                                                                                                                                                                                                                                                                                                                                                                                                                                                                                                                                                                                                                                                                                                                                                                                                                                                                                                                                                                                                                                                                                                                                                                                                                                                                                                                                                                                                                                                                        | T  | D  |    | R  |    |    | P  |    | Q   | S   | IGLV6-57 |  |
| 5b4292e250f5f91012e6d676 | I                                                                                                                                                                                                                                                                                                                                                                                                                                                                                                                                                                                                                                                                                                                                                                                                                                                                                                                                                                                                                                                                                                                                                                                                                                                                                                                                                                                                                                                                                                                                                                                                                                                                                                                                                                                                                                                                                                                                                                                                                                                                                                                                                                                                                                                                                                                                                                                                                                                                                                                                                                                                                                                                                                                                                                                                                                                                                                                                                                                                                                                                                                                                                                                                                                                                                                                                                                                                                                                                                                                                                                                                                                                                                                                                                                                                                                                                                                                                                                                                                                                                                                                                                                                                                                                                                                                                                                        | T  | D  |    | R  |    |    |    |    | Q   | S   | IGLV6-57 |  |
| 5b4292e250f5f91012e6d65f | I                                                                                                                                                                                                                                                                                                                                                                                                                                                                                                                                                                                                                                                                                                                                                                                                                                                                                                                                                                                                                                                                                                                                                                                                                                                                                                                                                                                                                                                                                                                                                                                                                                                                                                                                                                                                                                                                                                                                                                                                                                                                                                                                                                                                                                                                                                                                                                                                                                                                                                                                                                                                                                                                                                                                                                                                                                                                                                                                                                                                                                                                                                                                                                                                                                                                                                                                                                                                                                                                                                                                                                                                                                                                                                                                                                                                                                                                                                                                                                                                                                                                                                                                                                                                                                                                                                                                                                        | T  | D  |    | R  |    |    |    |    | Q   | S   | IGLV6-57 |  |
| 5b4292e250f5f91012e6d7d9 | I                                                                                                                                                                                                                                                                                                                                                                                                                                                                                                                                                                                                                                                                                                                                                                                                                                                                                                                                                                                                                                                                                                                                                                                                                                                                                                                                                                                                                                                                                                                                                                                                                                                                                                                                                                                                                                                                                                                                                                                                                                                                                                                                                                                                                                                                                                                                                                                                                                                                                                                                                                                                                                                                                                                                                                                                                                                                                                                                                                                                                                                                                                                                                                                                                                                                                                                                                                                                                                                                                                                                                                                                                                                                                                                                                                                                                                                                                                                                                                                                                                                                                                                                                                                                                                                                                                                                                                        | T  | D  | G  |    | R  |    |    |    | Q   | S   | IGLV6-57 |  |
| 5b4292e250f5f91012e6d6a5 | I                                                                                                                                                                                                                                                                                                                                                                                                                                                                                                                                                                                                                                                                                                                                                                                                                                                                                                                                                                                                                                                                                                                                                                                                                                                                                                                                                                                                                                                                                                                                                                                                                                                                                                                                                                                                                                                                                                                                                                                                                                                                                                                                                                                                                                                                                                                                                                                                                                                                                                                                                                                                                                                                                                                                                                                                                                                                                                                                                                                                                                                                                                                                                                                                                                                                                                                                                                                                                                                                                                                                                                                                                                                                                                                                                                                                                                                                                                                                                                                                                                                                                                                                                                                                                                                                                                                                                                        | T  | D  |    | R  |    |    | Y  |    | Q   | S   | IGLV6-57 |  |
| 5b4292e250f5f91012e6d713 | I                                                                                                                                                                                                                                                                                                                                                                                                                                                                                                                                                                                                                                                                                                                                                                                                                                                                                                                                                                                                                                                                                                                                                                                                                                                                                                                                                                                                                                                                                                                                                                                                                                                                                                                                                                                                                                                                                                                                                                                                                                                                                                                                                                                                                                                                                                                                                                                                                                                                                                                                                                                                                                                                                                                                                                                                                                                                                                                                                                                                                                                                                                                                                                                                                                                                                                                                                                                                                                                                                                                                                                                                                                                                                                                                                                                                                                                                                                                                                                                                                                                                                                                                                                                                                                                                                                                                                                        | TT | D  |    | R  |    |    |    |    | Q   | S   | IGLV6-57 |  |
| 5b4292e250f5f91012e6d6ed | I                                                                                                                                                                                                                                                                                                                                                                                                                                                                                                                                                                                                                                                                                                                                                                                                                                                                                                                                                                                                                                                                                                                                                                                                                                                                                                                                                                                                                                                                                                                                                                                                                                                                                                                                                                                                                                                                                                                                                                                                                                                                                                                                                                                                                                                                                                                                                                                                                                                                                                                                                                                                                                                                                                                                                                                                                                                                                                                                                                                                                                                                                                                                                                                                                                                                                                                                                                                                                                                                                                                                                                                                                                                                                                                                                                                                                                                                                                                                                                                                                                                                                                                                                                                                                                                                                                                                                                        | T  | D  |    | R  |    |    |    |    | Q   | S   | IGLV6-57 |  |
| 5b4292e250f5f91012e6d6a6 | T                                                                                                                                                                                                                                                                                                                                                                                                                                                                                                                                                                                                                                                                                                                                                                                                                                                                                                                                                                                                                                                                                                                                                                                                                                                                                                                                                                                                                                                                                                                                                                                                                                                                                                                                                                                                                                                                                                                                                                                                                                                                                                                                                                                                                                                                                                                                                                                                                                                                                                                                                                                                                                                                                                                                                                                                                                                                                                                                                                                                                                                                                                                                                                                                                                                                                                                                                                                                                                                                                                                                                                                                                                                                                                                                                                                                                                                                                                                                                                                                                                                                                                                                                                                                                                                                                                                                                                        | I  | T  | D  |    | R  |    |    |    | Q   | S   | IGLV6-57 |  |
| 5b4292e250f5f91012e6d703 | I                                                                                                                                                                                                                                                                                                                                                                                                                                                                                                                                                                                                                                                                                                                                                                                                                                                                                                                                                                                                                                                                                                                                                                                                                                                                                                                                                                                                                                                                                                                                                                                                                                                                                                                                                                                                                                                                                                                                                                                                                                                                                                                                                                                                                                                                                                                                                                                                                                                                                                                                                                                                                                                                                                                                                                                                                                                                                                                                                                                                                                                                                                                                                                                                                                                                                                                                                                                                                                                                                                                                                                                                                                                                                                                                                                                                                                                                                                                                                                                                                                                                                                                                                                                                                                                                                                                                                                        | T  | D  |    | R  |    |    |    |    | Q   | S   | IGLV6-57 |  |
| 5b4292e250f5f91012e6d734 | K                                                                                                                                                                                                                                                                                                                                                                                                                                                                                                                                                                                                                                                                                                                                                                                                                                                                                                                                                                                                                                                                                                                                                                                                                                                                                                                                                                                                                                                                                                                                                                                                                                                                                                                                                                                                                                                                                                                                                                                                                                                                                                                                                                                                                                                                                                                                                                                                                                                                                                                                                                                                                                                                                                                                                                                                                                                                                                                                                                                                                                                                                                                                                                                                                                                                                                                                                                                                                                                                                                                                                                                                                                                                                                                                                                                                                                                                                                                                                                                                                                                                                                                                                                                                                                                                                                                                                                        | I  | T  | D  |    | R  |    |    |    | Q   | S   | IGLV6-57 |  |
| 5b4292e250f5f91012e6d782 | I                                                                                                                                                                                                                                                                                                                                                                                                                                                                                                                                                                                                                                                                                                                                                                                                                                                                                                                                                                                                                                                                                                                                                                                                                                                                                                                                                                                                                                                                                                                                                                                                                                                                                                                                                                                                                                                                                                                                                                                                                                                                                                                                                                                                                                                                                                                                                                                                                                                                                                                                                                                                                                                                                                                                                                                                                                                                                                                                                                                                                                                                                                                                                                                                                                                                                                                                                                                                                                                                                                                                                                                                                                                                                                                                                                                                                                                                                                                                                                                                                                                                                                                                                                                                                                                                                                                                                                        | T  | D  |    | R  |    |    | T  |    | Q   | S   | IGLV6-57 |  |
| 5b4292e250f5f91012e6d687 | L                                                                                                                                                                                                                                                                                                                                                                                                                                                                                                                                                                                                                                                                                                                                                                                                                                                                                                                                                                                                                                                                                                                                                                                                                                                                                                                                                                                                                                                                                                                                                                                                                                                                                                                                                                                                                                                                                                                                                                                                                                                                                                                                                                                                                                                                                                                                                                                                                                                                                                                                                                                                                                                                                                                                                                                                                                                                                                                                                                                                                                                                                                                                                                                                                                                                                                                                                                                                                                                                                                                                                                                                                                                                                                                                                                                                                                                                                                                                                                                                                                                                                                                                                                                                                                                                                                                                                                        | I  | T  | D  |    | R  |    |    |    | Q   | S   | IGLV6-57 |  |
| 5b4292e250f5f91012e6d633 | I                                                                                                                                                                                                                                                                                                                                                                                                                                                                                                                                                                                                                                                                                                                                                                                                                                                                                                                                                                                                                                                                                                                                                                                                                                                                                                                                                                                                                                                                                                                                                                                                                                                                                                                                                                                                                                                                                                                                                                                                                                                                                                                                                                                                                                                                                                                                                                                                                                                                                                                                                                                                                                                                                                                                                                                                                                                                                                                                                                                                                                                                                                                                                                                                                                                                                                                                                                                                                                                                                                                                                                                                                                                                                                                                                                                                                                                                                                                                                                                                                                                                                                                                                                                                                                                                                                                                                                        | T  | D  |    | R  |    |    |    |    | Q   | S   | IGLV6-57 |  |
| 5b4292e250f5f91012e6d6ef | I                                                                                                                                                                                                                                                                                                                                                                                                                                                                                                                                                                                                                                                                                                                                                                                                                                                                                                                                                                                                                                                                                                                                                                                                                                                                                                                                                                                                                                                                                                                                                                                                                                                                                                                                                                                                                                                                                                                                                                                                                                                                                                                                                                                                                                                                                                                                                                                                                                                                                                                                                                                                                                                                                                                                                                                                                                                                                                                                                                                                                                                                                                                                                                                                                                                                                                                                                                                                                                                                                                                                                                                                                                                                                                                                                                                                                                                                                                                                                                                                                                                                                                                                                                                                                                                                                                                                                                        | T  | D  |    | R  |    |    | P  |    | Q   | S   | IGLV6-57 |  |
| 5b4292e250f5f91012e6d6b8 | I                                                                                                                                                                                                                                                                                                                                                                                                                                                                                                                                                                                                                                                                                                                                                                                                                                                                                                                                                                                                                                                                                                                                                                                                                                                                                                                                                                                                                                                                                                                                                                                                                                                                                                                                                                                                                                                                                                                                                                                                                                                                                                                                                                                                                                                                                                                                                                                                                                                                                                                                                                                                                                                                                                                                                                                                                                                                                                                                                                                                                                                                                                                                                                                                                                                                                                                                                                                                                                                                                                                                                                                                                                                                                                                                                                                                                                                                                                                                                                                                                                                                                                                                                                                                                                                                                                                                                                        | T  | D  |    | R  |    |    |    |    | Q   | S   | IGLV6-57 |  |
| 5b4292e250f5f91012e6d7cf | I                                                                                                                                                                                                                                                                                                                                                                                                                                                                                                                                                                                                                                                                                                                                                                                                                                                                                                                                                                                                                                                                                                                                                                                                                                                                                                                                                                                                                                                                                                                                                                                                                                                                                                                                                                                                                                                                                                                                                                                                                                                                                                                                                                                                                                                                                                                                                                                                                                                                                                                                                                                                                                                                                                                                                                                                                                                                                                                                                                                                                                                                                                                                                                                                                                                                                                                                                                                                                                                                                                                                                                                                                                                                                                                                                                                                                                                                                                                                                                                                                                                                                                                                                                                                                                                                                                                                                                        | Y  | T  | D  |    | R  |    |    |    | Q   | S   | IGLV6-57 |  |
| 5b4292e250f5f91012e6d5ff | I                                                                                                                                                                                                                                                                                                                                                                                                                                                                                                                                                                                                                                                                                                                                                                                                                                                                                                                                                                                                                                                                                                                                                                                                                                                                                                                                                                                                                                                                                                                                                                                                                                                                                                                                                                                                                                                                                                                                                                                                                                                                                                                                                                                                                                                                                                                                                                                                                                                                                                                                                                                                                                                                                                                                                                                                                                                                                                                                                                                                                                                                                                                                                                                                                                                                                                                                                                                                                                                                                                                                                                                                                                                                                                                                                                                                                                                                                                                                                                                                                                                                                                                                                                                                                                                                                                                                                                        | T  | D  |    | R  |    |    |    |    | Q   | S   | IGLV6-57 |  |
| 5b4292e250f5f91012e6d7cb | I                                                                                                                                                                                                                                                                                                                                                                                                                                                                                                                                                                                                                                                                                                                                                                                                                                                                                                                                                                                                                                                                                                                                                                                                                                                                                                                                                                                                                                                                                                                                                                                                                                                                                                                                                                                                                                                                                                                                                                                                                                                                                                                                                                                                                                                                                                                                                                                                                                                                                                                                                                                                                                                                                                                                                                                                                                                                                                                                                                                                                                                                                                                                                                                                                                                                                                                                                                                                                                                                                                                                                                                                                                                                                                                                                                                                                                                                                                                                                                                                                                                                                                                                                                                                                                                                                                                                                                        | T  | D  |    | R  |    |    | L  |    | Q   | S   | IGLV6-57 |  |
| 5b4292e250f5f91012e6d6c9 | I                                                                                                                                                                                                                                                                                                                                                                                                                                                                                                                                                                                                                                                                                                                                                                                                                                                                                                                                                                                                                                                                                                                                                                                                                                                                                                                                                                                                                                                                                                                                                                                                                                                                                                                                                                                                                                                                                                                                                                                                                                                                                                                                                                                                                                                                                                                                                                                                                                                                                                                                                                                                                                                                                                                                                                                                                                                                                                                                                                                                                                                                                                                                                                                                                                                                                                                                                                                                                                                                                                                                                                                                                                                                                                                                                                                                                                                                                                                                                                                                                                                                                                                                                                                                                                                                                                                                                                        | T  | D  |    | R  |    |    |    |    | Q   | S   | IGLV6-57 |  |
| 5b4292e250f5f91012e6d6d2 | I                                                                                                                                                                                                                                                                                                                                                                                                                                                                                                                                                                                                                                                                                                                                                                                                                                                                                                                                                                                                                                                                                                                                                                                                                                                                                                                                                                                                                                                                                                                                                                                                                                                                                                                                                                                                                                                                                                                                                                                                                                                                                                                                                                                                                                                                                                                                                                                                                                                                                                                                                                                                                                                                                                                                                                                                                                                                                                                                                                                                                                                                                                                                                                                                                                                                                                                                                                                                                                                                                                                                                                                                                                                                                                                                                                                                                                                                                                                                                                                                                                                                                                                                                                                                                                                                                                                                                                        | T  | D  |    | R  |    |    |    |    | Q   | S   | IGLV6-57 |  |
| 5b4292e250f5f91012e6d60f | I                                                                                                                                                                                                                                                                                                                                                                                                                                                                                                                                                                                                                                                                                                                                                                                                                                                                                                                                                                                                                                                                                                                                                                                                                                                                                                                                                                                                                                                                                                                                                                                                                                                                                                                                                                                                                                                                                                                                                                                                                                                                                                                                                                                                                                                                                                                                                                                                                                                                                                                                                                                                                                                                                                                                                                                                                                                                                                                                                                                                                                                                                                                                                                                                                                                                                                                                                                                                                                                                                                                                                                                                                                                                                                                                                                                                                                                                                                                                                                                                                                                                                                                                                                                                                                                                                                                                                                        | T  | D  |    | R  |    |    |    |    | Q   | S   | IGLV6-57 |  |
| 5b4292e250f5f91012e6d610 | I                                                                                                                                                                                                                                                                                                                                                                                                                                                                                                                                                                                                                                                                                                                                                                                                                                                                                                                                                                                                                                                                                                                                                                                                                                                                                                                                                                                                                                                                                                                                                                                                                                                                                                                                                                                                                                                                                                                                                                                                                                                                                                                                                                                                                                                                                                                                                                                                                                                                                                                                                                                                                                                                                                                                                                                                                                                                                                                                                                                                                                                                                                                                                                                                                                                                                                                                                                                                                                                                                                                                                                                                                                                                                                                                                                                                                                                                                                                                                                                                                                                                                                                                                                                                                                                                                                                                                                        | T  | D  |    | R  |    |    | K  |    | Q   | S   | IGLV6-57 |  |
| 5b4292e250f5f91012e6d6f9 | I                                                                                                                                                                                                                                                                                                                                                                                                                                                                                                                                                                                                                                                                                                                                                                                                                                                                                                                                                                                                                                                                                                                                                                                                                                                                                                                                                                                                                                                                                                                                                                                                                                                                                                                                                                                                                                                                                                                                                                                                                                                                                                                                                                                                                                                                                                                                                                                                                                                                                                                                                                                                                                                                                                                                                                                                                                                                                                                                                                                                                                                                                                                                                                                                                                                                                                                                                                                                                                                                                                                                                                                                                                                                                                                                                                                                                                                                                                                                                                                                                                                                                                                                                                                                                                                                                                                                                                        | T  | A  | D  |    | R  |    |    |    | Q   | S   | IGLV6-57 |  |
| 5b4292e250f5f91012e6d62e | S                                                                                                                                                                                                                                                                                                                                                                                                                                                                                                                                                                                                                                                                                                                                                                                                                                                                                                                                                                                                                                                                                                                                                                                                                                                                                                                                                                                                                                                                                                                                                                                                                                                                                                                                                                                                                                                                                                                                                                                                                                                                                                                                                                                                                                                                                                                                                                                                                                                                                                                                                                                                                                                                                                                                                                                                                                                                                                                                                                                                                                                                                                                                                                                                                                                                                                                                                                                                                                                                                                                                                                                                                                                                                                                                                                                                                                                                                                                                                                                                                                                                                                                                                                                                                                                                                                                                                                        | I  | T  | D  |    | R  |    |    |    | Q   | S   | IGLV6-57 |  |
| 5b4292e250f5f91012e6d67c | I                                                                                                                                                                                                                                                                                                                                                                                                                                                                                                                                                                                                                                                                                                                                                                                                                                                                                                                                                                                                                                                                                                                                                                                                                                                                                                                                                                                                                                                                                                                                                                                                                                                                                                                                                                                                                                                                                                                                                                                                                                                                                                                                                                                                                                                                                                                                                                                                                                                                                                                                                                                                                                                                                                                                                                                                                                                                                                                                                                                                                                                                                                                                                                                                                                                                                                                                                                                                                                                                                                                                                                                                                                                                                                                                                                                                                                                                                                                                                                                                                                                                                                                                                                                                                                                                                                                                                                        | T  | D  |    | R  |    |    |    | V  | Q   | S   | IGLV6-57 |  |
| 5b4292e250f5f91012e6d685 | I                                                                                                                                                                                                                                                                                                                                                                                                                                                                                                                                                                                                                                                                                                                                                                                                                                                                                                                                                                                                                                                                                                                                                                                                                                                                                                                                                                                                                                                                                                                                                                                                                                                                                                                                                                                                                                                                                                                                                                                                                                                                                                                                                                                                                                                                                                                                                                                                                                                                                                                                                                                                                                                                                                                                                                                                                                                                                                                                                                                                                                                                                                                                                                                                                                                                                                                                                                                                                                                                                                                                                                                                                                                                                                                                                                                                                                                                                                                                                                                                                                                                                                                                                                                                                                                                                                                                                                        | T  | D  |    | R  |    |    |    |    | Q   | S   | IGLV6-57 |  |
| 5b4292e250f5f91012e6d761 | T                                                                                                                                                                                                                                                                                                                                                                                                                                                                                                                                                                                                                                                                                                                                                                                                                                                                                                                                                                                                                                                                                                                                                                                                                                                                                                                                                                                                                                                                                                                                                                                                                                                                                                                                                                                                                                                                                                                                                                                                                                                                                                                                                                                                                                                                                                                                                                                                                                                                                                                                                                                                                                                                                                                                                                                                                                                                                                                                                                                                                                                                                                                                                                                                                                                                                                                                                                                                                                                                                                                                                                                                                                                                                                                                                                                                                                                                                                                                                                                                                                                                                                                                                                                                                                                                                                                                                                        | I  | T  | D  |    | R  |    |    |    | Q   | S   | IGLV6-57 |  |
| 5b4292e250f5f91012e6d65e | I                                                                                                                                                                                                                                                                                                                                                                                                                                                                                                                                                                                                                                                                                                                                                                                                                                                                                                                                                                                                                                                                                                                                                                                                                                                                                                                                                                                                                                                                                                                                                                                                                                                                                                                                                                                                                                                                                                                                                                                                                                                                                                                                                                                                                                                                                                                                                                                                                                                                                                                                                                                                                                                                                                                                                                                                                                                                                                                                                                                                                                                                                                                                                                                                                                                                                                                                                                                                                                                                                                                                                                                                                                                                                                                                                                                                                                                                                                                                                                                                                                                                                                                                                                                                                                                                                                                                                                        | T  | D  |    | R  |    |    |    |    | Q   | S   | IGLV6-57 |  |
| 5b4292e250f5f91012e6d7bd | I                                                                                                                                                                                                                                                                                                                                                                                                                                                                                                                                                                                                                                                                                                                                                                                                                                                                                                                                                                                                                                                                                                                                                                                                                                                                                                                                                                                                                                                                                                                                                                                                                                                                                                                                                                                                                                                                                                                                                                                                                                                                                                                                                                                                                                                                                                                                                                                                                                                                                                                                                                                                                                                                                                                                                                                                                                                                                                                                                                                                                                                                                                                                                                                                                                                                                                                                                                                                                                                                                                                                                                                                                                                                                                                                                                                                                                                                                                                                                                                                                                                                                                                                                                                                                                                                                                                                                                        | V  | T  | D  |    | R  |    |    |    | Q   | S   | IGLV6-57 |  |
| 5b4292e250f5f91012e6d6df | I                                                                                                                                                                                                                                                                                                                                                                                                                                                                                                                                                                                                                                                                                                                                                                                                                                                                                                                                                                                                                                                                                                                                                                                                                                                                                                                                                                                                                                                                                                                                                                                                                                                                                                                                                                                                                                                                                                                                                                                                                                                                                                                                                                                                                                                                                                                                                                                                                                                                                                                                                                                                                                                                                                                                                                                                                                                                                                                                                                                                                                                                                                                                                                                                                                                                                                                                                                                                                                                                                                                                                                                                                                                                                                                                                                                                                                                                                                                                                                                                                                                                                                                                                                                                                                                                                                                                                                        | T  | D  |    | R  |    |    |    |    | Q   | S   | IGLV6-57 |  |
| 5b4292e250f5f91012e6d7c4 | I                                                                                                                                                                                                                                                                                                                                                                                                                                                                                                                                                                                                                                                                                                                                                                                                                                                                                                                                                                                                                                                                                                                                                                                                                                                                                                                                                                                                                                                                                                                                                                                                                                                                                                                                                                                                                                                                                                                                                                                                                                                                                                                                                                                                                                                                                                                                                                                                                                                                                                                                                                                                                                                                                                                                                                                                                                                                                                                                                                                                                                                                                                                                                                                                                                                                                                                                                                                                                                                                                                                                                                                                                                                                                                                                                                                                                                                                                                                                                                                                                                                                                                                                                                                                                                                                                                                                                                        | T  | DK | D  |    | R  |    |    |    | Q   | S   | IGLV6-57 |  |
| 5b4292e250f5f91012e6d74a | I                                                                                                                                                                                                                                                                                                                                                                                                                                                                                                                                                                                                                                                                                                                                                                                                                                                                                                                                                                                                                                                                                                                                                                                                                                                                                                                                                                                                                                                                                                                                                                                                                                                                                                                                                                                                                                                                                                                                                                                                                                                                                                                                                                                                                                                                                                                                                                                                                                                                                                                                                                                                                                                                                                                                                                                                                                                                                                                                                                                                                                                                                                                                                                                                                                                                                                                                                                                                                                                                                                                                                                                                                                                                                                                                                                                                                                                                                                                                                                                                                                                                                                                                                                                                                                                                                                                                                                        | R  | T  | D  |    | R  |    |    |    | Q   | S   | IGLV6-57 |  |
| 5b4292e250f5f91012e6d768 | I                                                                                                                                                                                                                                                                                                                                                                                                                                                                                                                                                                                                                                                                                                                                                                                                                                                                                                                                                                                                                                                                                                                                                                                                                                                                                                                                                                                                                                                                                                                                                                                                                                                                                                                                                                                                                                                                                                                                                                                                                                                                                                                                                                                                                                                                                                                                                                                                                                                                                                                                                                                                                                                                                                                                                                                                                                                                                                                                                                                                                                                                                                                                                                                                                                                                                                                                                                                                                                                                                                                                                                                                                                                                                                                                                                                                                                                                                                                                                                                                                                                                                                                                                                                                                                                                                                                                                                        | I  | T  | D  |    | R  |    |    |    | Q   | S   | IGLV6-57 |  |
| 5b4292e250f5f91012e6d6e1 | T                                                                                                                                                                                                                                                                                                                                                                                                                                                                                                                                                                                                                                                                                                                                                                                                                                                                                                                                                                                                                                                                                                                                                                                                                                                                                                                                                                                                                                                                                                                                                                                                                                                                                                                                                                                                                                                                                                                                                                                                                                                                                                                                                                                                                                                                                                                                                                                                                                                                                                                                                                                                                                                                                                                                                                                                                                                                                                                                                                                                                                                                                                                                                                                                                                                                                                                                                                                                                                                                                                                                                                                                                                                                                                                                                                                                                                                                                                                                                                                                                                                                                                                                                                                                                                                                                                                                                                        | I  | T  | D  |    | R  |    |    |    | Q   | S   | IGLV6-57 |  |
| 5b4292e250f5f91012e6d79c | F                                                                                                                                                                                                                                                                                                                                                                                                                                                                                                                                                                                                                                                                                                                                                                                                                                                                                                                                                                                                                                                                                                                                                                                                                                                                                                                                                                                                                                                                                                                                                                                                                                                                                                                                                                                                                                                                                                                                                                                                                                                                                                                                                                                                                                                                                                                                                                                                                                                                                                                                                                                                                                                                                                                                                                                                                                                                                                                                                                                                                                                                                                                                                                                                                                                                                                                                                                                                                                                                                                                                                                                                                                                                                                                                                                                                                                                                                                                                                                                                                                                                                                                                                                                                                                                                                                                                                                        | I  | T  | D  |    | R  |    |    |    | Q   | S   | IGLV6-57 |  |
| 5b4292e250f5f91012e6d785 | I                                                                                                                                                                                                                                                                                                                                                                                                                                                                                                                                                                                                                                                                                                                                                                                                                                                                                                                                                                                                                                                                                                                                                                                                                                                                                                                                                                                                                                                                                                                                                                                                                                                                                                                                                                                                                                                                                                                                                                                                                                                                                                                                                                                                                                                                                                                                                                                                                                                                                                                                                                                                                                                                                                                                                                                                                                                                                                                                                                                                                                                                                                                                                                                                                                                                                                                                                                                                                                                                                                                                                                                                                                                                                                                                                                                                                                                                                                                                                                                                                                                                                                                                                                                                                                                                                                                                                                        | T  | D  |    | R  |    |    | S  |    | Q   | S   | IGLV6-57 |  |
| 5b4292e250f5f91012e6d649 | T                                                                                                                                                                                                                                                                                                                                                                                                                                                                                                                                                                                                                                                                                                                                                                                                                                                                                                                                                                                                                                                                                                                                                                                                                                                                                                                                                                                                                                                                                                                                                                                                                                                                                                                                                                                                                                                                                                                                                                                                                                                                                                                                                                                                                                                                                                                                                                                                                                                                                                                                                                                                                                                                                                                                                                                                                                                                                                                                                                                                                                                                                                                                                                                                                                                                                                                                                                                                                                                                                                                                                                                                                                                                                                                                                                                                                                                                                                                                                                                                                                                                                                                                                                                                                                                                                                                                                                        | I  | T  | D  |    | R  |    |    |    | Q   | S   | IGLV6-57 |  |
| 5b4292e250f5f91012e6d674 | I                                                                                                                                                                                                                                                                                                                                                                                                                                                                                                                                                                                                                                                                                                                                                                                                                                                                                                                                                                                                                                                                                                                                                                                                                                                                                                                                                                                                                                                                                                                                                                                                                                                                                                                                                                                                                                                                                                                                                                                                                                                                                                                                                                                                                                                                                                                                                                                                                                                                                                                                                                                                                                                                                                                                                                                                                                                                                                                                                                                                                                                                                                                                                                                                                                                                                                                                                                                                                                                                                                                                                                                                                                                                                                                                                                                                                                                                                                                                                                                                                                                                                                                                                                                                                                                                                                                                                                        | T  | D  |    | R  |    |    |    |    | Q   | S   | IGLV6-57 |  |
| 5b4292e250f5f91012e6d6a3 | AI                                                                                                                                                                                                                                                                                                                                                                                                                                                                                                                                                                                                                                                                                                                                                                                                                                                                                                                                                                                                                                                                                                                                                                                                                                                                                                                                                                                                                                                                                                                                                                                                                                                                                                                                                                                                                                                                                                                                                                                                                                                                                                                                                                                                                                                                                                                                                                                                                                                                                                                                                                                                                                                                                                                                                                                                                                                                                                                                                                                                                                                                                                                                                                                                                                                                                                                                                                                                                                                                                                                                                                                                                                                                                                                                                                                                                                                                                                                                                                                                                                                                                                                                                                                                                                                                                                                                                                       | I  | T  | D  |    | R  |    |    | E  | Q   | S   | IGLV6-57 |  |
| 5b4292e250f5f91012e6d606 | L                                                                                                                                                                                                                                                                                                                                                                                                                                                                                                                                                                                                                                                                                                                                                                                                                                                                                                                                                                                                                                                                                                                                                                                                                                                                                                                                                                                                                                                                                                                                                                                                                                                                                                                                                                                                                                                                                                                                                                                                                                                                                                                                                                                                                                                                                                                                                                                                                                                                                                                                                                                                                                                                                                                                                                                                                                                                                                                                                                                                                                                                                                                                                                                                                                                                                                                                                                                                                                                                                                                                                                                                                                                                                                                                                                                                                                                                                                                                                                                                                                                                                                                                                                                                                                                                                                                                                                        | I  | T  | D  |    | R  |    |    |    | Q   | S   | IGLV6-57 |  |
| 5b4292e250f5f91012e6d789 | I                                                                                                                                                                                                                                                                                                                                                                                                                                                                                                                                                                                                                                                                                                                                                                                                                                                                                                                                                                                                                                                                                                                                                                                                                                                                                                                                                                                                                                                                                                                                                                                                                                                                                                                                                                                                                                                                                                                                                                                                                                                                                                                                                                                                                                                                                                                                                                                                                                                                                                                                                                                                                                                                                                                                                                                                                                                                                                                                                                                                                                                                                                                                                                                                                                                                                                                                                                                                                                                                                                                                                                                                                                                                                                                                                                                                                                                                                                                                                                                                                                                                                                                                                                                                                                                                                                                                                                        | T  | T  | D  |    | R  |    |    |    | Q   | S   | IGLV6-57 |  |
| 5b4292e250f5f91012e6d677 | I                                                                                                                                                                                                                                                                                                                                                                                                                                                                                                                                                                                                                                                                                                                                                                                                                                                                                                                                                                                                                                                                                                                                                                                                                                                                                                                                                                                                                                                                                                                                                                                                                                                                                                                                                                                                                                                                                                                                                                                                                                                                                                                                                                                                                                                                                                                                                                                                                                                                                                                                                                                                                                                                                                                                                                                                                                                                                                                                                                                                                                                                                                                                                                                                                                                                                                                                                                                                                                                                                                                                                                                                                                                                                                                                                                                                                                                                                                                                                                                                                                                                                                                                                                                                                                                                                                                                                                        | T  | D  |    | R  |    |    |    |    | Q   | S   | IGLV6-57 |  |
| 5b4292e250f5f91012e6d636 | I                                                                                                                                                                                                                                                                                                                                                                                                                                                                                                                                                                                                                                                                                                                                                                                                                                                                                                                                                                                                                                                                                                                                                                                                                                                                                                                                                                                                                                                                                                                                                                                                                                                                                                                                                                                                                                                                                                                                                                                                                                                                                                                                                                                                                                                                                                                                                                                                                                                                                                                                                                                                                                                                                                                                                                                                                                                                                                                                                                                                                                                                                                                                                                                                                                                                                                                                                                                                                                                                                                                                                                                                                                                                                                                                                                                                                                                                                                                                                                                                                                                                                                                                                                                                                                                                                                                                                                        | T  | D  |    | R  |    |    | P  |    | Q   | S   | IGLV6-57 |  |
| 5b4292e250f5f91012e6d6d8 | I                                                                                                                                                                                                                                                                                                                                                                                                                                                                                                                                                                                                                                                                                                                                                                                                                                                                                                                                                                                                                                                                                                                                                                                                                                                                                                                                                                                                                                                                                                                                                                                                                                                                                                                                                                                                                                                                                                                                                                                                                                                                                                                                                                                                                                                                                                                                                                                                                                                                                                                                                                                                                                                                                                                                                                                                                                                                                                                                                                                                                                                                                                                                                                                                                                                                                                                                                                                                                                                                                                                                                                                                                                                                                                                                                                                                                                                                                                                                                                                                                                                                                                                                                                                                                                                                                                                                                                        | T  | D  |    | R  |    |    |    |    | Q   | S   | IGLV6-57 |  |
| 5b4292e250f5f91012e6d6d4 | I                                                                                                                                                                                                                                                                                                                                                                                                                                                                                                                                                                                                                                                                                                                                                                                                                                                                                                                                                                                                                                                                                                                                                                                                                                                                                                                                                                                                                                                                                                                                                                                                                                                                                                                                                                                                                                                                                                                                                                                                                                                                                                                                                                                                                                                                                                                                                                                                                                                                                                                                                                                                                                                                                                                                                                                                                                                                                                                                                                                                                                                                                                                                                                                                                                                                                                                                                                                                                                                                                                                                                                                                                                                                                                                                                                                                                                                                                                                                                                                                                                                                                                                                                                                                                                                                                                                                                                        | T  | D  |    | R  |    |    |    |    | Q   | S   | IGLV6-57 |  |
| 5b4292e250f5f91012e6d64f | I                                                                                                                                                                                                                                                                                                                                                                                                                                                                                                                                                                                                                                                                                                                                                                                                                                                                                                                                                                                                                                                                                                                                                                                                                                                                                                                                                                                                                                                                                                                                                                                                                                                                                                                                                                                                                                                                                                                                                                                                                                                                                                                                                                                                                                                                                                                                                                                                                                                                                                                                                                                                                                                                                                                                                                                                                                                                                                                                                                                                                                                                                                                                                                                                                                                                                                                                                                                                                                                                                                                                                                                                                                                                                                                                                                                                                                                                                                                                                                                                                                                                                                                                                                                                                                                                                                                                                                        | T  | D  |    | R  |    |    |    |    | Q   | S   | IGLV6-57 |  |
| 5b4292e250f5f91012e6d77e | I                                                                                                                                                                                                                                                                                                                                                                                                                                                                                                                                                                                                                                                                                                                                                                                                                                                                                                                                                                                                                                                                                                                                                                                                                                                                                                                                                                                                                                                                                                                                                                                                                                                                                                                                                                                                                                                                                                                                                                                                                                                                                                                                                                                                                                                                                                                                                                                                                                                                                                                                                                                                                                                                                                                                                                                                                                                                                                                                                                                                                                                                                                                                                                                                                                                                                                                                                                                                                                                                                                                                                                                                                                                                                                                                                                                                                                                                                                                                                                                                                                                                                                                                                                                                                                                                                                                                                                        | T  | D  |    | R  |    |    |    |    | Q   | S   | IGLV6-57 |  |
| 5b4292e250f5f91012e6d6d5 | M                                                                                                                                                                                                                                                                                                                                                                                                                                                                                                                                                                                                                                                                                                                                                                                                                                                                                                                                                                                                                                                                                                                                                                                                                                                                                                                                                                                                                                                                                                                                                                                                                                                                                                                                                                                                                                                                                                                                                                                                                                                                                                                                                                                                                                                                                                                                                                                                                                                                                                                                                                                                                                                                                                                                                                                                                                                                                                                                                                                                                                                                                                                                                                                                                                                                                                                                                                                                                                                                                                                                                                                                                                                                                                                                                                                                                                                                                                                                                                                                                                                                                                                                                                                                                                                                                                                                                                        | I  | T  | D  |    | R  |    |    |    | Q   | S   | IGLV6-57 |  |
| 5b4292e250f5f91012e6d683 | I                                                                                                                                                                                                                                                                                                                                                                                                                                                                                                                                                                                                                                                                                                                                                                                                                                                                                                                                                                                                                                                                                                                                                                                                                                                                                                                                                                                                                                                                                                                                                                                                                                                                                                                                                                                                                                                                                                                                                                                                                                                                                                                                                                                                                                                                                                                                                                                                                                                                                                                                                                                                                                                                                                                                                                                                                                                                                                                                                                                                                                                                                                                                                                                                                                                                                                                                                                                                                                                                                                                                                                                                                                                                                                                                                                                                                                                                                                                                                                                                                                                                                                                                                                                                                                                                                                                                                                        | T  | D  |    | R  |    |    |    | P  | Q   | S   | IGLV6-57 |  |
| 5b4292e250f5f91012e6d7a9 | I                                                                                                                                                                                                                                                                                                                                                                                                                                                                                                                                                                                                                                                                                                                                                                                                                                                                                                                                                                                                                                                                                                                                                                                                                                                                                                                                                                                                                                                                                                                                                                                                                                                                                                                                                                                                                                                                                                                                                                                                                                                                                                                                                                                                                                                                                                                                                                                                                                                                                                                                                                                                                                                                                                                                                                                                                                                                                                                                                                                                                                                                                                                                                                                                                                                                                                                                                                                                                                                                                                                                                                                                                                                                                                                                                                                                                                                                                                                                                                                                                                                                                                                                                                                                                                                                                                                                                                        | T  | D  |    | R  |    |    | N  |    | Q   | S   | IGLV6-57 |  |
| 5b4292e250f5f91012e6d651 | I                                                                                                                                                                                                                                                                                                                                                                                                                                                                                                                                                                                                                                                                                                                                                                                                                                                                                                                                                                                                                                                                                                                                                                                                                                                                                                                                                                                                                                                                                                                                                                                                                                                                                                                                                                                                                                                                                                                                                                                                                                                                                                                                                                                                                                                                                                                                                                                                                                                                                                                                                                                                                                                                                                                                                                                                                                                                                                                                                                                                                                                                                                                                                                                                                                                                                                                                                                                                                                                                                                                                                                                                                                                                                                                                                                                                                                                                                                                                                                                                                                                                                                                                                                                                                                                                                                                                                                        | T  | D  |    | R  |    |    |    |    | Q   | S   | IGLV6-57 |  |
| 5b4292e250f5f91012e6d79a | Y                                                                                                                                                                                                                                                                                                                                                                                                                                                                                                                                                                                                                                                                                                                                                                                                                                                                                                                                                                                                                                                                                                                                                                                                                                                                                                                                                                                                                                                                                                                                                                                                                                                                                                                                                                                                                                                                                                                                                                                                                                                                                                                                                                                                                                                                                                                                                                                                                                                                                                                                                                                                                                                                                                                                                                                                                                                                                                                                                                                                                                                                                                                                                                                                                                                                                                                                                                                                                                                                                                                                                                                                                                                                                                                                                                                                                                                                                                                                                                                                                                                                                                                                                                                                                                                                                                                                                                        | I  | T  | D  |    | R  |    |    |    | Q   | S   | IGLV6-57 |  |
| 5b4292e250f5f91012e6d75b | I                                                                                                                                                                                                                                                                                                                                                                                                                                                                                                                                                                                                                                                                                                                                                                                                                                                                                                                                                                                                                                                                                                                                                                                                                                                                                                                                                                                                                                                                                                                                                                                                                                                                                                                                                                                                                                                                                                                                                                                                                                                                                                                                                                                                                                                                                                                                                                                                                                                                                                                                                                                                                                                                                                                                                                                                                                                                                                                                                                                                                                                                                                                                                                                                                                                                                                                                                                                                                                                                                                                                                                                                                                                                                                                                                                                                                                                                                                                                                                                                                                                                                                                                                                                                                                                                                                                                                                        | L  | T  | D  |    | R  |    |    |    | Q   | S   | IGLV6-57 |  |
| 5b4292e250f5f91012e6d78f | I                                                                                                                                                                                                                                                                                                                                                                                                                                                                                                                                                                                                                                                                                                                                                                                                                                                                                                                                                                                                                                                                                                                                                                                                                                                                                                                                                                                                                                                                                                                                                                                                                                                                                                                                                                                                                                                                                                                                                                                                                                                                                                                                                                                                                                                                                                                                                                                                                                                                                                                                                                                                                                                                                                                                                                                                                                                                                                                                                                                                                                                                                                                                                                                                                                                                                                                                                                                                                                                                                                                                                                                                                                                                                                                                                                                                                                                                                                                                                                                                                                                                                                                                                                                                                                                                                                                                                                        | T  | D  |    | R  |    |    | V  |    | Q   | S   | IGLV6-57 |  |
| 5b4292e250f5f91012e6d791 | I                                                                                                                                                                                                                                                                                                                                                                                                                                                                                                                                                                                                                                                                                                                                                                                                                                                                                                                                                                                                                                                                                                                                                                                                                                                                                                                                                                                                                                                                                                                                                                                                                                                                                                                                                                                                                                                                                                                                                                                                                                                                                                                                                                                                                                                                                                                                                                                                                                                                                                                                                                                                                                                                                                                                                                                                                                                                                                                                                                                                                                                                                                                                                                                                                                                                                                                                                                                                                                                                                                                                                                                                                                                                                                                                                                                                                                                                                                                                                                                                                                                                                                                                                                                                                                                                                                                                                                        | T  | D  |    | R  |    |    |    |    | Q   | S   | IGLV6-57 |  |
| 5b4292e250f5f91012e6d6e9 | I                                                                                                                                                                                                                                                                                                                                                                                                                                                                                                                                                                                                                                                                                                                                                                                                                                                                                                                                                                                                                                                                                                                                                                                                                                                                                                                                                                                                                                                                                                                                                                                                                                                                                                                                                                                                                                                                                                                                                                                                                                                                                                                                                                                                                                                                                                                                                                                                                                                                                                                                                                                                                                                                                                                                                                                                                                                                                                                                                                                                                                                                                                                                                                                                                                                                                                                                                                                                                                                                                                                                                                                                                                                                                                                                                                                                                                                                                                                                                                                                                                                                                                                                                                                                                                                                                                                                                                        | T  | D  |    | R  |    |    |    |    | Q   | S   | IGLV6-57 |  |
| 5b4292e250f5f91012e6d661 | I                                                                                                                                                                                                                                                                                                                                                                                                                                                                                                                                                                                                                                                                                                                                                                                                                                                                                                                                                                                                                                                                                                                                                                                                                                                                                                                                                                                                                                                                                                                                                                                                                                                                                                                                                                                                                                                                                                                                                                                                                                                                                                                                                                                                                                                                                                                                                                                                                                                                                                                                                                                                                                                                                                                                                                                                                                                                                                                                                                                                                                                                                                                                                                                                                                                                                                                                                                                                                                                                                                                                                                                                                                                                                                                                                                                                                                                                                                                                                                                                                                                                                                                                                                                                                                                                                                                                                                        | T  | D  |    | R  |    |    | Y  |    | Q   | S   | IGLV6-57 |  |
| 5b4292e250f5f91012e6d680 | I                                                                                                                                                                                                                                                                                                                                                                                                                                                                                                                                                                                                                                                                                                                                                                                                                                                                                                                                                                                                                                                                                                                                                                                                                                                                                                                                                                                                                                                                                                                                                                                                                                                                                                                                                                                                                                                                                                                                                                                                                                                                                                                                                                                                                                                                                                                                                                                                                                                                                                                                                                                                                                                                                                                                                                                                                                                                                                                                                                                                                                                                                                                                                                                                                                                                                                                                                                                                                                                                                                                                                                                                                                                                                                                                                                                                                                                                                                                                                                                                                                                                                                                                                                                                                                                                                                                                                                        | T  | D  |    | R  |    |    |    |    | Q   | S   | IGLV6-57 |  |
| 5b4292e250f5f91012e6d728 | M                                                                                                                                                                                                                                                                                                                                                                                                                                                                                                                                                                                                                                                                                                                                                                                                                                                                                                                                                                                                                                                                                                                                                                                                                                                                                                                                                                                                                                                                                                                                                                                                                                                                                                                                                                                                                                                                                                                                                                                                                                                                                                                                                                                                                                                                                                                                                                                                                                                                                                                                                                                                                                                                                                                                                                                                                                                                                                                                                                                                                                                                                                                                                                                                                                                                                                                                                                                                                                                                                                                                                                                                                                                                                                                                                                                                                                                                                                                                                                                                                                                                                                                                                                                                                                                                                                                                                                        | I  | T  | D  |    | R  |    |    |    | Q   | S   | IGLV6-57 |  |
| 5b4292e250f5f91012e6d609 | I                                                                                                                                                                                                                                                                                                                                                                                                                                                                                                                                                                                                                                                                                                                                                                                                                                                                                                                                                                                                                                                                                                                                                                                                                                                                                                                                                                                                                                                                                                                                                                                                                                                                                                                                                                                                                                                                                                                                                                                                                                                                                                                                                                                                                                                                                                                                                                                                                                                                                                                                                                                                                                                                                                                                                                                                                                                                                                                                                                                                                                                                                                                                                                                                                                                                                                                                                                                                                                                                                                                                                                                                                                                                                                                                                                                                                                                                                                                                                                                                                                                                                                                                                                                                                                                                                                                                                                        | T  | D  |    | R  |    |    |    |    | Q   | S   | IGLV6-57 |  |
| 5b4292e250f5f91012e6d68e | I                                                                                                                                                                                                                                                                                                                                                                                                                                                                                                                                                                                                                                                                                                                                                                                                                                                                                                                                                                                                                                                                                                                                                                                                                                                                                                                                                                                                                                                                                                                                                                                                                                                                                                                                                                                                                                                                                                                                                                                                                                                                                                                                                                                                                                                                                                                                                                                                                                                                                                                                                                                                                                                                                                                                                                                                                                                                                                                                                                                                                                                                                                                                                                                                                                                                                                                                                                                                                                                                                                                                                                                                                                                                                                                                                                                                                                                                                                                                                                                                                                                                                                                                                                                                                                                                                                                                                                        | T  | D  |    | R  |    |    |    | V  | Q   | S   | IGLV6-57 |  |
| 5b4292e250f5f91012e6d5fd | I                                                                                                                                                                                                                                                                                                                                                                                                                                                                                                                                                                                                                                                                                                                                                                                                                                                                                                                                                                                                                                                                                                                                                                                                                                                                                                                                                                                                                                                                                                                                                                                                                                                                                                                                                                                                                                                                                                                                                                                                                                                                                                                                                                                                                                                                                                                                                                                                                                                                                                                                                                                                                                                                                                                                                                                                                                                                                                                                                                                                                                                                                                                                                                                                                                                                                                                                                                                                                                                                                                                                                                                                                                                                                                                                                                                                                                                                                                                                                                                                                                                                                                                                                                                                                                                                                                                                                                        | T  | D  |    | R  |    |    |    |    | Q   | S   | IGLV6-57 |  |
| 5b4292e250f5f91012e6d615 | I                                                                                                                                                                                                                                                                                                                                                                                                                                                                                                                                                                                                                                                                                                                                                                                                                                                                                                                                                                                                                                                                                                                                                                                                                                                                                                                                                                                                                                                                                                                                                                                                                                                                                                                                                                                                                                                                                                                                                                                                                                                                                                                                                                                                                                                                                                                                                                                                                                                                                                                                                                                                                                                                                                                                                                                                                                                                                                                                                                                                                                                                                                                                                                                                                                                                                                                                                                                                                                                                                                                                                                                                                                                                                                                                                                                                                                                                                                                                                                                                                                                                                                                                                                                                                                                                                                                                                                        | T  | D  |    | R  |    |    |    |    | Q   | S   | IGLV6-57 |  |
| 5b4292e250f5f91012e6d70a | I                                                                                                                                                                                                                                                                                                                                                                                                                                                                                                                                                                                                                                                                                                                                                                                                                                                                                                                                                                                                                                                                                                                                                                                                                                                                                                                                                                                                                                                                                                                                                                                                                                                                                                                                                                                                                                                                                                                                                                                                                                                                                                                                                                                                                                                                                                                                                                                                                                                                                                                                                                                                                                                                                                                                                                                                                                                                                                                                                                                                                                                                                                                                                                                                                                                                                                                                                                                                                                                                                                                                                                                                                                                                                                                                                                                                                                                                                                                                                                                                                                                                                                                                                                                                                                                                                                                                                                        | T  | D  |    | R  |    |    |    | I  | Q   | S   | IGLV6-57 |  |
| 5b4292e250f5f91012e6d7ac | I                                                                                                                                                                                                                                                                                                                                                                                                                                                                                                                                                                                                                                                                                                                                                                                                                                                                                                                                                                                                                                                                                                                                                                                                                                                                                                                                                                                                                                                                                                                                                                                                                                                                                                                                                                                                                                                                                                                                                                                                                                                                                                                                                                                                                                                                                                                                                                                                                                                                                                                                                                                                                                                                                                                                                                                                                                                                                                                                                                                                                                                                                                                                                                                                                                                                                                                                                                                                                                                                                                                                                                                                                                                                                                                                                                                                                                                                                                                                                                                                                                                                                                                                                                                                                                                                                                                                                                        | V  | T  | D  |    | R  |    |    |    | Q   | S   | IGLV6-57 |  |
| 5b4292e250f5f91012e6d6d3 | I                                                                                                                                                                                                                                                                                                                                                                                                                                                                                                                                                                                                                                                                                                                                                                                                                                                                                                                                                                                                                                                                                                                                                                                                                                                                                                                                                                                                                                                                                                                                                                                                                                                                                                                                                                                                                                                                                                                                                                                                                                                                                                                                                                                                                                                                                                                                                                                                                                                                                                                                                                                                                                                                                                                                                                                                                                                                                                                                                                                                                                                                                                                                                                                                                                                                                                                                                                                                                                                                                                                                                                                                                                                                                                                                                                                                                                                                                                                                                                                                                                                                                                                                                                                                                                                                                                                                                                        | T  | D  |    | R  |    |    | L  |    | Q   | S   | IGLV6-57 |  |
| 5b4292e250f5f91012e6d62f | I                                                                                                                                                                                                                                                                                                                                                                                                                                                                                                                                                                                                                                                                                                                                                                                                                                                                                                                                                                                                                                                                                                                                                                                                                                                                                                                                                                                                                                                                                                                                                                                                                                                                                                                                                                                                                                                                                                                                                                                                                                                                                                                                                                                                                                                                                                                                                                                                                                                                                                                                                                                                                                                                                                                                                                                                                                                                                                                                                                                                                                                                                                                                                                                                                                                                                                                                                                                                                                                                                                                                                                                                                                                                                                                                                                                                                                                                                                                                                                                                                                                                                                                                                                                                                                                                                                                                                                        | T  | D  |    | R  |    |    |    |    | Q   | S   | IGLV6-57 |  |
| 5b4292e250f5f91012e6d637 | L                                                                                                                                                                                                                                                                                                                                                                                                                                                                                                                                                                                                                                                                                                                                                                                                                                                                                                                                                                                                                                                                                                                                                                                                                                                                                                                                                                                                                                                                                                                                                                                                                                                                                                                                                                                                                                                                                                                                                                                                                                                                                                                                                                                                                                                                                                                                                                                                                                                                                                                                                                                                                                                                                                                                                                                                                                                                                                                                                                                                                                                                                                                                                                                                                                                                                                                                                                                                                                                                                                                                                                                                                                                                                                                                                                                                                                                                                                                                                                                                                                                                                                                                                                                                                                                                                                                                                                        | E  | I  | D  |    | R  |    |    |    | Q   | S   | IGLV6-57 |  |
| 5b4292e250f5f91012e6d63b | I                                                                                                                                                                                                                                                                                                                                                                                                                                                                                                                                                                                                                                                                                                                                                                                                                                                                                                                                                                                                                                                                                                                                                                                                                                                                                                                                                                                                                                                                                                                                                                                                                                                                                                                                                                                                                                                                                                                                                                                                                                                                                                                                                                                                                                                                                                                                                                                                                                                                                                                                                                                                                                                                                                                                                                                                                                                                                                                                                                                                                                                                                                                                                                                                                                                                                                                                                                                                                                                                                                                                                                                                                                                                                                                                                                                                                                                                                                                                                                                                                                                                                                                                                                                                                                                                                                                                                                        | T  | D  |    | R  |    |    |    |    | Q   | S   | IGLV6-57 |  |
| 5b4292e250f5f91012e6d66b | I                                                                                                                                                                                                                                                                                                                                                                                                                                                                                                                                                                                                                                                                                                                                                                                                                                                                                                                                                                                                                                                                                                                                                                                                                                                                                                                                                                                                                                                                                                                                                                                                                                                                                                                                                                                                                                                                                                                                                                                                                                                                                                                                                                                                                                                                                                                                                                                                                                                                                                                                                                                                                                                                                                                                                                                                                                                                                                                                                                                                                                                                                                                                                                                                                                                                                                                                                                                                                                                                                                                                                                                                                                                                                                                                                                                                                                                                                                                                                                                                                                                                                                                                                                                                                                                                                                                                                                        | T  | D  |    | R  |    |    |    | Y  | Q   | S   | IGLV6-57 |  |
| 5b4292e250f5f91012e6d6de | I                                                                                                                                                                                                                                                                                                                                                                                                                                                                                                                                                                                                                                                                                                                                                                                                                                                                                                                                                                                                                                                                                                                                                                                                                                                                                                                                                                                                                                                                                                                                                                                                                                                                                                                                                                                                                                                                                                                                                                                                                                                                                                                                                                                                                                                                                                                                                                                                                                                                                                                                                                                                                                                                                                                                                                                                                                                                                                                                                                                                                                                                                                                                                                                                                                                                                                                                                                                                                                                                                                                                                                                                                                                                                                                                                                                                                                                                                                                                                                                                                                                                                                                                                                                                                                                                                                                                                                        | T  | D  |    | R  |    |    |    |    | Q   | S   | IGLV6-57 |  |
| 5b4292e250f5f91012e6d6be | I                                                                                                                                                                                                                                                                                                                                                                                                                                                                                                                                                                                                                                                                                                                                                                                                                                                                                                                                                                                                                                                                                                                                                                                                                                                                                                                                                                                                                                                                                                                                                                                                                                                                                                                                                                                                                                                                                                                                                                                                                                                                                                                                                                                                                                                                                                                                                                                                                                                                                                                                                                                                                                                                                                                                                                                                                                                                                                                                                                                                                                                                                                                                                                                                                                                                                                                                                                                                                                                                                                                                                                                                                                                                                                                                                                                                                                                                                                                                                                                                                                                                                                                                                                                                                                                                                                                                                                        | T  | R  | D  |    | R  |    |    |    | Q   | S   | IGLV6-57 |  |
| 5b4292e250f5f91012e6d795 | I                                                                                                                                                                                                                                                                                                                                                                                                                                                                                                                                                                                                                                                                                                                                                                                                                                                                                                                                                                                                                                                                                                                                                                                                                                                                                                                                                                                                                                                                                                                                                                                                                                                                                                                                                                                                                                                                                                                                                                                                                                                                                                                                                                                                                                                                                                                                                                                                                                                                                                                                                                                                                                                                                                                                                                                                                                                                                                                                                                                                                                                                                                                                                                                                                                                                                                                                                                                                                                                                                                                                                                                                                                                                                                                                                                                                                                                                                                                                                                                                                                                                                                                                                                                                                                                                                                                                                                        | T  | D  |    | R  |    |    |    |    | Q   | S   | IGLV6-57 |  |
| 5b4292e250f5f91012e6d710 | I                                                                                                                                                                                                                                                                                                                                                                                                                                                                                                                                                                                                                                                                                                                                                                                                                                                                                                                                                                                                                                                                                                                                                                                                                                                                                                                                                                                                                                                                                                                                                                                                                                                                                                                                                                                                                                                                                                                                                                                                                                                                                                                                                                                                                                                                                                                                                                                                                                                                                                                                                                                                                                                                                                                                                                                                                                                                                                                                                                                                                                                                                                                                                                                                                                                                                                                                                                                                                                                                                                                                                                                                                                                                                                                                                                                                                                                                                                                                                                                                                                                                                                                                                                                                                                                                                                                                                                        | T  | D  |    | R  |    |    |    |    | Q   | S   | IGLV6-57 |  |
| 5b4292e250f5f91012e6d777 | I                                                                                                                                                                                                                                                                                                                                                                                                                                                                                                                                                                                                                                                                                                                                                                                                                                                                                                                                                                                                                                                                                                                                                                                                                                                                                                                                                                                                                                                                                                                                                                                                                                                                                                                                                                                                                                                                                                                                                                                                                                                                                                                                                                                                                                                                                                                                                                                                                                                                                                                                                                                                                                                                                                                                                                                                                                                                                                                                                                                                                                                                                                                                                                                                                                                                                                                                                                                                                                                                                                                                                                                                                                                                                                                                                                                                                                                                                                                                                                                                                                                                                                                                                                                                                                                                                                                                                                        | T  | D  |    | R  |    |    | Y  |    | Q   | S   | IGLV6-57 |  |
| 5b4292e250f5f91012e6d71e | I                                                                                                                                                                                                                                                                                                                                                                                                                                                                                                                                                                                                                                                                                                                                                                                                                                                                                                                                                                                                                                                                                                                                                                                                                                                                                                                                                                                                                                                                                                                                                                                                                                                                                                                                                                                                                                                                                                                                                                                                                                                                                                                                                                                                                                                                                                                                                                                                                                                                                                                                                                                                                                                                                                                                                                                                                                                                                                                                                                                                                                                                                                                                                                                                                                                                                                                                                                                                                                                                                                                                                                                                                                                                                                                                                                                                                                                                                                                                                                                                                                                                                                                                                                                                                                                                                                                                                                        | T  | D  |    | R  |    |    |    | W  | Q   | S   | IGLV6-57 |  |
| 5b4292e250f5f91012e6d740 | I                                                                                                                                                                                                                                                                                                                                                                                                                                                                                                                                                                                                                                                                                                                                                                                                                                                                                                                                                                                                                                                                                                                                                                                                                                                                                                                                                                                                                                                                                                                                                                                                                                                                                                                                                                                                                                                                                                                                                                                                                                                                                                                                                                                                                                                                                                                                                                                                                                                                                                                                                                                                                                                                                                                                                                                                                                                                                                                                                                                                                                                                                                                                                                                                                                                                                                                                                                                                                                                                                                                                                                                                                                                                                                                                                                                                                                                                                                                                                                                                                                                                                                                                                                                                                                                                                                                                                                        | T  | D  |    | R  |    |    |    | Y  | Q   | S   | IGLV6-57 |  |

|                          |     |   |   |   |    |    |   |         |
|--------------------------|-----|---|---|---|----|----|---|---------|
| 5b4292e250f5f91012e6d753 | I   | T |   | D |    | R  |   | QG.S.G. |
| 5b4292e250f5f91012e6d5f9 | I   | T |   | D |    | RA |   | QG.S.G. |
| 5b4292e250f5f91012e6d738 | I   | T |   | D |    | R  |   | QG.S.G. |
| 5b4292e250f5f91012e6d758 | I   | T |   | D |    | R  |   | QG.S.G. |
| 5b4292e250f5f91012e6d762 | I   | T |   | D | I  | R  |   | QG.S.G. |
| 5b4292e250f5f91012e6d645 | I   | T |   | D |    | R  | E | QG.S.G. |
| 5b4292e250f5f91012e6d6b2 | I   | T |   | D |    | R  |   | QG.S.G. |
| 5b4292e250f5f91012e6d669 | I   | T |   | D |    | R  |   | QG.S.G. |
| 5b4292e250f5f91012e6d79b | I   | T |   | D |    | R  |   | QG.S.G. |
| 5b4292e250f5f91012e6d626 | I   | T |   | D |    | W  |   | QG.S.G. |
| 5b4292e250f5f91012e6d77c | I   | T |   | D |    | R  |   | QG.S.G. |
| 5b4292e250f5f91012e6d74d | IL  | T |   | D |    | R  |   | QG.S.G. |
| 5b4292e250f5f91012e6d613 | I   | T |   | D |    | R  |   | QG.S.G. |
| 5b4292e250f5f91012e6d63d | I   | T |   | D | D  | R  |   | QG.S.G. |
| 5b4292e250f5f91012e6d705 | G   | I |   | D |    | R  |   | QG.S.G. |
| 5b4292e250f5f91012e6d6a2 | I   | C | T | D |    | R  |   | QG.S.G. |
| 5b4292e250f5f91012e6d691 | I   | T |   | D |    | R  |   | QG.S.G. |
| 5b4292e250f5f91012e6d6c3 | I   | T |   | D | P  | R  |   | QG.S.G. |
| 5b4292e250f5f91012e6d67f | I   | T |   | D |    | R  | F | QG.S.G. |
| 5b4292e250f5f91012e6d78b | I   | T |   | D |    | R  |   | QG.S.G. |
| 5b4292e250f5f91012e6d73d | R   | I |   | D |    | R  | D | QG.S.G. |
| 5b4292e250f5f91012e6d665 | I   | T |   | D | Y  | R  |   | QG.S.G. |
| 5b4292e250f5f91012e6d6d6 | I   | T |   | D |    | F  | R | QG.S.G. |
| 5b4292e250f5f91012e6d750 | I   | T |   | D |    | R  |   | QG.S.G. |
| 5b4292e250f5f91012e6d64c | I   | T |   | D |    | R  |   | QG.S.G. |
| 5b4292e250f5f91012e6d60c | HLP | I |   | D |    | R  |   | QG.S.G. |
| 5b4292e250f5f91012e6d6b7 | I   | T | S | D |    | R  |   | QG.S.G. |
| 5b4292e250f5f91012e6d67a | I   | T |   | D |    | R  |   | QG.S.G. |
| 5b4292e250f5f91012e6d64d | I   | T |   | D |    | R  |   | QG.S.G. |
| 5b4292e250f5f91012e6d70e | I   | T | A | D |    | R  |   | QG.S.G. |
| 5b4292e250f5f91012e6d7c3 | I   | T |   | D |    | R  |   | QG.S.G. |
| 5b4292e250f5f91012e6d73f | I   | T |   | D |    | R  |   | QG.S.G. |
| 5b4292e250f5f91012e6d668 | I   | T |   | D |    | Y  | R | QG.S.G. |
| 5b4292e250f5f91012e6d770 | Y   | I |   | D |    | R  |   | QG.S.G. |
| 5b4292e250f5f91012e6d778 | I   | Y | T | D |    | R  | S | QG.S.G. |
| 5b4292e250f5f91012e6d7d3 | F   | I |   | D |    | R  |   | QG.S.G. |
| 5b4292e250f5f91012e6d682 | I   | T |   | D | D  | R  |   | QG.S.G. |
| 5b4292e250f5f91012e6d764 | I   | T |   | D |    | R  |   | QG.S.G. |
| 5b4292e250f5f91012e6d69e | H   | I |   | D |    | R  |   | QG.S.G. |
| 5b4292e250f5f91012e6d605 | I   | T |   | D |    | R  |   | QG.S.G. |
| 5b4292e250f5f91012e6d6fe | I   | T |   | D |    | R  |   | QG.S.G. |
| 5b4292e250f5f91012e6d5fc | I   | T | H | D |    | R  |   | QG.S.G. |
| 5b4292e250f5f91012e6d771 | I   | T |   | D | H  | R  |   | QG.S.G. |
| 5b4292e250f5f91012e6d726 | V   | I | Y | D |    | R  |   | QG.S.G. |
| 5b4292e250f5f91012e6d716 | I   | T |   | D |    | R  |   | QG.S.G. |
| 5b4292e250f5f91012e6d616 | I   | T | R | D |    | R  |   | QG.S.G. |
| 5b4292e250f5f91012e6d7d0 | I   | T |   | D |    | R  |   | QG.S.G. |
| 5b4292e250f5f91012e6d744 | I   | T |   | D |    | R  |   | QG.S.G. |
| 5b4292e250f5f91012e6d663 | I   | T |   | D |    | R  | Y | QG.S.G. |
| 5b4292e250f5f91012e6d61b | F   | I |   | D |    | R  |   | QG.S.G. |
| 5b4292e250f5f91012e6d6ab | I   | T |   | D |    | R  |   | QG.S.G. |
| 5b4292e250f5f91012e6d6af | I   | T |   | D |    | R  | H | QG.S.G. |
| 5b4292e250f5f91012e6d765 | I   | T |   | D | E  | R  |   | QG.S.G. |
| 5b4292e250f5f91012e6d655 | I   | T |   | D |    | R  |   | QG.S.G. |
| 5b4292e250f5f91012e6d76d | I   | T |   | D |    | R  |   | QG.S.G. |
| 5b4292e250f5f91012e6d756 | I   | T |   | D |    | R  | M | QG.S.G. |
| 5b4292e250f5f91012e6d731 | I   | T |   | D | S  | R  |   | QG.S.G. |
| 5b4292e250f5f91012e6d6e2 | I   | T |   | D |    | RY |   | QG.S.G. |
| 5b4292e250f5f91012e6d6e3 | I   | T |   | D |    | R  | T | QG.S.G. |
| 5b4292e250f5f91012e6d6cb | I   | T |   | D | N  | R  |   | QG.S.G. |
| 5b4292e250f5f91012e6d7b0 | I   | R | T | R | D  | R  |   | QG.S.G. |
| 5b4292e250f5f91012e6d631 | I   | T | L | D |    | R  |   | QG.S.G. |
| 5b4292e250f5f91012e6d7d1 | I   | T |   | D |    | R  |   | QG.S.G. |
| 5b4292e250f5f91012e6d62c | I   | T |   | D |    | R  |   | QG.S.G. |
| 5b4292e250f5f91012e6d6dc | I   | T | S | D |    | R  |   | QG.S.G. |
| 5b4292e250f5f91012e6d64b | N   | I |   | D |    | R  |   | QG.S.G. |
| 5b4292e250f5f91012e6d623 | I   | T |   | D |    | R  |   | QG.S.G. |
| 5b4292e250f5f91012e6d7c7 | I   | T | A | D |    | R  |   | QG.S.G. |
| 5b4292e250f5f91012e6d617 | Y   | I |   | D | DK | R  |   | QG.S.G. |
| 5b4292e250f5f91012e6d75d | I   | T |   | D |    | R  |   | QG.S.G. |
| 5b4292e250f5f91012e6d743 | I   | T | K | D |    | R  |   | QG.S.G. |
| 5b4292e250f5f91012e6d61d | I   | T |   | D |    | R  | I | QG.S.G. |
| 5b4292e250f5f91012e6d745 | I   | T |   | D |    | R  |   | QG.S.G. |
| 5b4292e250f5f91012e6d65d | I   | T | Q | D |    | R  |   | QG.S.G. |
| 5b4292e250f5f91012e6d638 | I   | T |   | D | E  | R  |   | QG.S.G. |
| 5b4292e250f5f91012e6d79f | I   | T |   | D | Y  | R  |   | QG.S.G. |
| 5b4292e250f5f91012e6d6c0 | I   | T |   | D |    | R  |   | QG.S.G. |
| 5b4292e250f5f91012e6d629 | I   | T |   | D |    | R  | P | QG.S.G. |
| 5b4292e250f5f91012e6d662 | I   | T | F | D |    | R  |   | QG.S.G. |
| 5b4292e250f5f91012e6d709 | I   | T |   | D |    | R  |   | QG.S.G. |
| 5b4292e250f5f91012e6d6c1 | I   | T |   | D | Q  | R  |   | QG.S.G. |
| 5b4292e250f5f91012e6d6e7 | I   | T |   | D |    | R  |   | QG.S.G. |
| 5b4292e250f5f91012e6d6e8 | I   | T |   | D |    | R  | H | QG.S.G. |
| 5b4292e250f5f91012e6d692 | I   | Y | T | D |    | R  |   | QG.S.G. |
| 5b4292e250f5f91012e6d6ec | I   | T |   | D |    | R  |   | QG.S.G. |
| 5b4292e250f5f91012e6d67d | Q   | I |   | D |    | R  |   | QG.S.G. |
| 5b4292e250f5f91012e6d6e0 | I   | T |   | D |    | R  |   | QG.S.G. |
| 5b4292e250f5f91012e6d67e | I   | T |   | D | P  | R  |   | QG.S.G. |
| 5b4292e250f5f91012e6d678 | I   | T |   | D | D  | R  |   | QG.S.G. |
| 5b4292e250f5f91012e6d6bc | I   | T |   | D |    | R  | I | QG.S.G. |
| 5b4292e250f5f91012e6d664 | I   | T |   | D | P  | R  |   | QG.S.G. |
| 5b4292e250f5f91012e6d64a | I   | T |   | D |    | R  |   | QG.S.G. |
| 5b4292e250f5f91012e6d699 | I   | T |   | D | H  | R  |   | QG.S.G. |
| 5b4292e250f5f91012e6d6b3 | I   | T |   | D |    | R  |   | QG.S.G. |
| 5b4292e250f5f91012e6d6c8 | I   | T |   | D |    | R  | N | QG.S.G. |
| 5b4292e250f5f91012e6d7c8 | I   | T |   | D |    | R  |   | QG.S.G. |
| 5b4292e250f5f91012e6d7c0 | K   | I |   | D |    | R  |   | QG.S.G. |
| 5b4292e250f5f91012e6d624 | I   | T |   | D |    | R  |   | QG.S.G. |
| 5b4292e250f5f91012e6d704 | I   | T |   | D |    | R  | Y | QG.S.G. |
| 5b4292e250f5f91012e6d620 | I   | T |   | D |    | R  |   | QG.S.G. |
| 5b4292e250f5f91012e6d6b1 | I   | T |   | D |    | R  | V | QG.S.G. |
| 5b4292e250f5f91012e6d688 | I   | T |   | D |    | R  |   | QG.S.G. |
| 5b4292e250f5f91012e6d6bf | I   | T |   | D | G  | R  |   | QG.S.G. |
| 5b4292e250f5f91012e6d6d9 | I   | T |   | D |    | T  | R | QG.S.G. |
| 5b4292e250f5f91012e6d7c5 | I   | T |   | D |    | R  |   | QG.S.G. |
| 5b4292e250f5f91012e6d5f8 | I   | T |   | D |    | R  | N | QG.S.G. |

|                          |   |    |    |   |           |         |
|--------------------------|---|----|----|---|-----------|---------|
| 5b4292e250f5f91012e6d679 | I | N  | D  | R | QG.S.G.   |         |
| 5b4292e250f5f91012e6d7a5 | T |    | D  | R | QG.S.G.   |         |
| 5b4292e250f5f91012e6d68f | I | T  | D  | R | QG.S.G.   |         |
| 5b4292e250f5f91012e6d69c | I | T  | D  | R | QG.S.G.   |         |
| 5b4292e250f5f91012e6d6cc | I | DT | D  | R | QG.S.G.   |         |
| 5b4292e250f5f91012e6d62b | I | T  | ED | R | QG.S.G.   |         |
| 5b4292e250f5f91012e6d77b | C | I  | D  | R | QG.S.G.   |         |
| 5b4292e250f5f91012e6d6a1 | I | T  | D  | R | QG.S.G.   |         |
| 5b4292e250f5f91012e6d712 | I | T  | D  | R | QG.S.G.   |         |
| 5b4292e250f5f91012e6d751 | N | I  | T  | R | QG.S.G.   |         |
| 5b4292e250f5f91012e6d65a | I | T  | M  | R | QG.S.G. I |         |
| 5b4292e250f5f91012e6d701 | I | T  | D  | R | QG.S.G.   |         |
| 5b4292e250f5f91012e6d70d | I | T  | D  | F | R         | QG.S.G. |
| 5b4292e250f5f91012e6d711 | I | S  | T  | D | R         | QG.S.G. |
| 5b4292e250f5f91012e6d659 | I | T  | D  | R | QG.S.G.   |         |
| 5b4292e250f5f91012e6d6c2 | P | I  | T  | D | R         | QG.S.G. |
| 5b4292e250f5f91012e6d73e |   | G  | T  | D | R         | QG.S.G. |
| 5b4292e250f5f91012e6d6fb | L | I  | T  | D | R         | QG.S.G. |
